# Supplementary material for: Diborane heterolysis and P(v) reduction by Ph3PO coordination to magnesium
Source: Royal Society of Chemistry journal article supplement (doi:10.1039/c9cc04294f), 2019-01-01
Supplement: c9cc04294f1.pdf [file c9cc04294f1.pdf]

Supplementary Information for

## Diborane Heterolysis and P(V) Reduction by Ph<sub>3</sub>P=O Coordination to Magnesium

Anne-Frédérique Pécharman, Nasir A. Rajabi, Michael S. Hill,\* Claire L. McMullin\* and Mary F. Mahon

*Department of Chemistry, University of Bath, Claverton Down, Bath, BA2 7AY UK*

### Supplementary Methods

#### General considerations and starting materials.

All manipulations were carried out using standard Schlenk line and glovebox techniques under an inert atmosphere of argon. NMR experiments were conducted in J Young tap NMR tubes made up and sealed in a glovebox. NMR spectra were recorded on an Agilent ProPulse spectrometer operating at 500 MHz (<sup>1</sup>H), 126 MHz (<sup>13</sup>C), 160.4 MHz (<sup>11</sup>B). The spectra were referenced relative to residual solvent resonances or an external BF<sub>3</sub>.OEt<sub>2</sub> standard (<sup>11</sup>B). Solvents (toluene, hexane) were dried by passage through a commercially available (Innovative Technologies) solvent purification system, under argon and stored in ampoules over molecular sieves. *d*<sub>8</sub>-Toluene was purchased from Fluorochem Ltd. and Sigma-Aldrich Ltd. and dried over molten potassium before distilling under argon and storing over molecular sieves. Di-*n*-butylmagnesium (1.0 M solution in *n*-heptane) and B<sub>2</sub>pin<sub>2</sub> were purchased from Sigma-Aldrich Ltd. [(BDI)Mg*n*-Bu] (BDI = HC{(Me)CNDipp}<sub>2</sub>; Dipp = 2,6-*i*-Pr<sub>2</sub>C<sub>6</sub>H<sub>3</sub>) was synthesised by a literature procedure.<sup>1</sup> Elemental analysis was carried out Mr Stephen Boyer of London Metropolitan Enterprises.

#### Synthesis of compound 11

Toluene-*d*<sub>8</sub> (0.5 mL) was added to a mixture of [(BDI)Mg*n*-Bu] (50 mg, 0.1 mmol) and bis(pinacolato)diboron (25.4 mg, 0.1 mmol) in a NMR tube fitted with J. Young tap. After 2 h, 1 equivalent of triphenylphosphine oxide (27.8 mg, 0.1 mmol) was added. After a further 1 h at RT, NMR spectra were recorded, which showed the formation of [(BDI)Mg(Bpin)(OPPh<sub>3</sub>)] (**11**) and *n*-BuBpin. Colourless crystals of compound **11** suitable for X-ray diffraction analysis were obtained during the removal of toluene under reduced pressure. <sup>1</sup>H NMR (500 MHz, toluene-*d*<sub>8</sub>) δ 7.19 - 6.98 (m, 21H, CH ar), 4.91 (s, 1H, NC(CH<sub>3</sub>)CH), 4.14 (hept, 2H, *J*<sub>HH</sub> = 6.8 Hz, CH(CH<sub>3</sub>)<sub>2</sub>), 3.48 (hept, 2H, *J*<sub>HH</sub> = 6.8 Hz, CH(CH<sub>3</sub>)<sub>2</sub>), 1.74 (s, 6H, NC(CH<sub>3</sub>)CH), 1.46 (d, 6H, *J*<sub>HH</sub> = 6.8 Hz, CH(CH<sub>3</sub>)<sub>2</sub>), 1.28 (s, 12H, B(OC(CH<sub>3</sub>)<sub>2</sub>)<sub>2</sub>), 1.22 (d, 6H, *J*<sub>HH</sub> = 6.8 Hz, CH(CH<sub>3</sub>)<sub>2</sub>), 1.13 (d, 6H, *J*<sub>HH</sub> = 6.8 Hz, CH(CH<sub>3</sub>)<sub>2</sub>), 1.07 (d,

6H,  $J_{HH} = 6.8$  Hz,  $\text{CH}(\text{CH}_3)_2$ ), 1.03 (*n*-BuBpin), 0.92 (*n*-BuBpin), 0.86 (d, 6H,  $J_{HH} = 6.8$  Hz,  $\text{CH}(\text{CH}_3)_2$ ) ppm.  $^{31}\text{P}\{^1\text{H}\}$  NMR (202 MHz, toluene)  $\delta$  36.35 (LMg(OBpin)(OPPh<sub>3</sub>)), 35.21 (LMg(Bpin)(OPPh<sub>3</sub>)), -5.26 (PPh<sub>3</sub>) ppm. Due to the extreme air- and moisture-sensitivity of compound **11**, an accurate microanalysis could not be obtained.

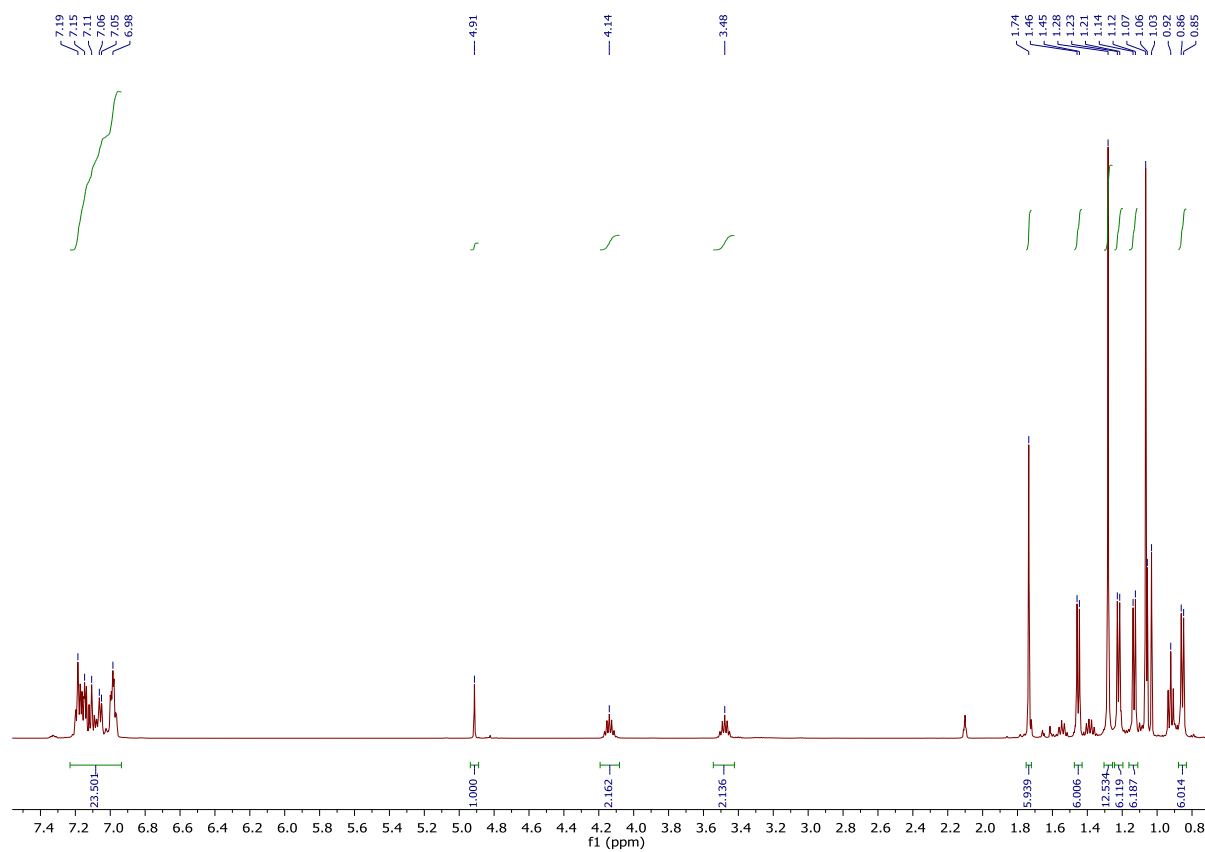

**Figure S1:**  $^1\text{H}$  NMR spectrum of compound **11** recorded in the presence of *n*-BuBpin side-product.

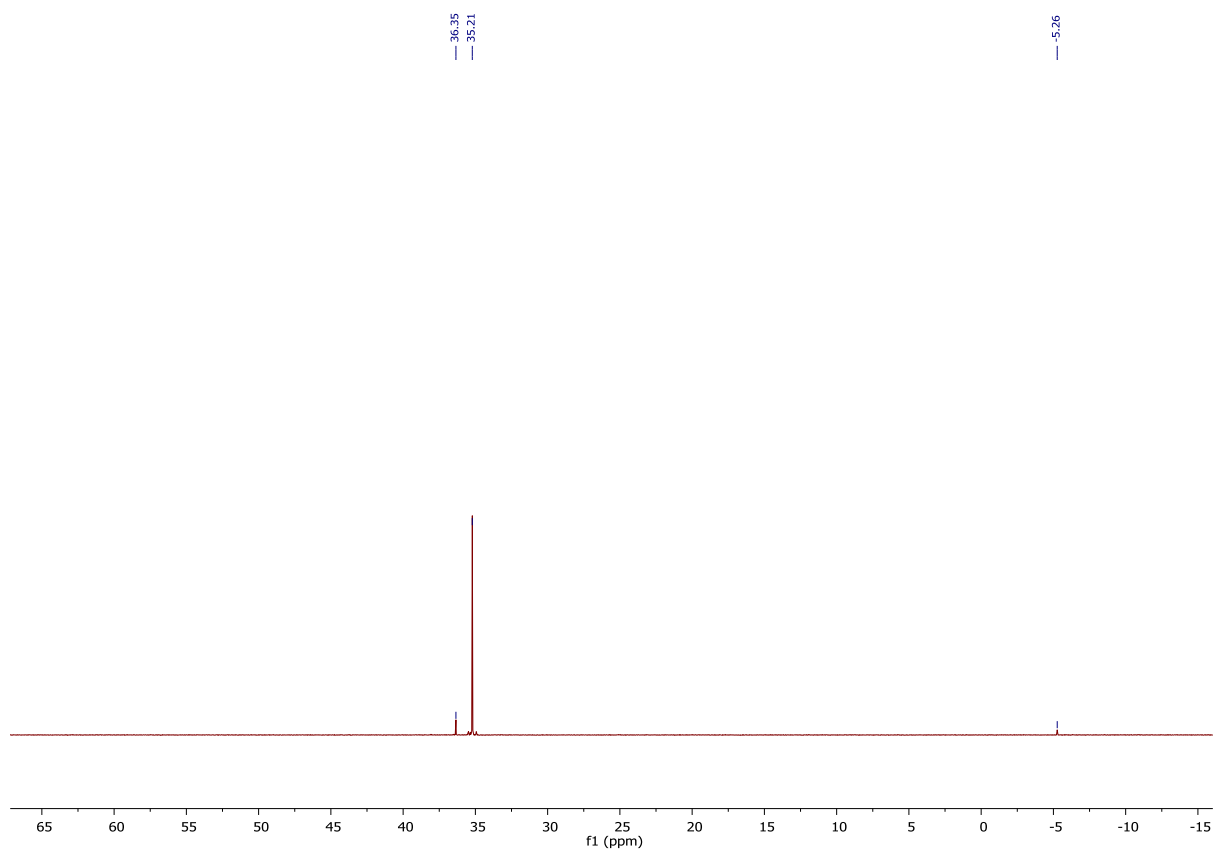

**Figure S2:**  $^{31}\text{P}\{^1\text{H}\}$  NMR spectrum of compound **11**. [ $\delta$  36.35 (LMg(OBpin)(OPPh<sub>3</sub>)), -5.26 (PPh<sub>3</sub>) ppm].

s2pul\_01  
test

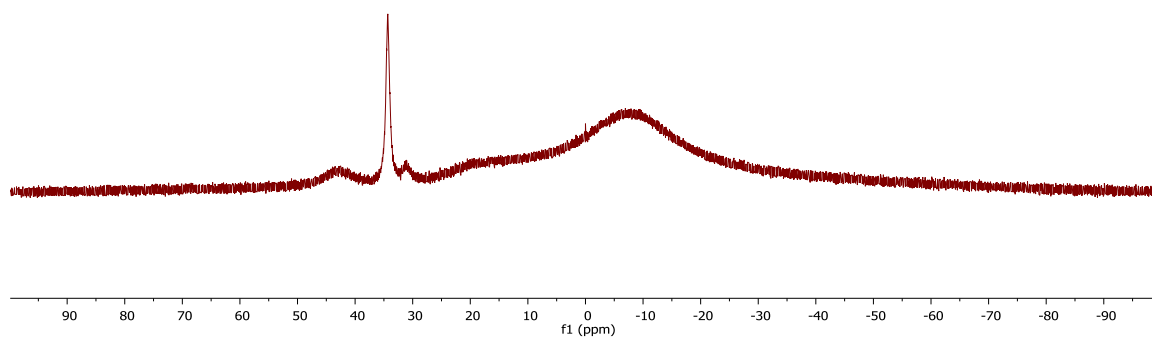

**Figure S3:**  $^{11}\text{B}\{^1\text{H}\}$  NMR spectrum of compound **11** showing the formation of *n*-BuBpin.

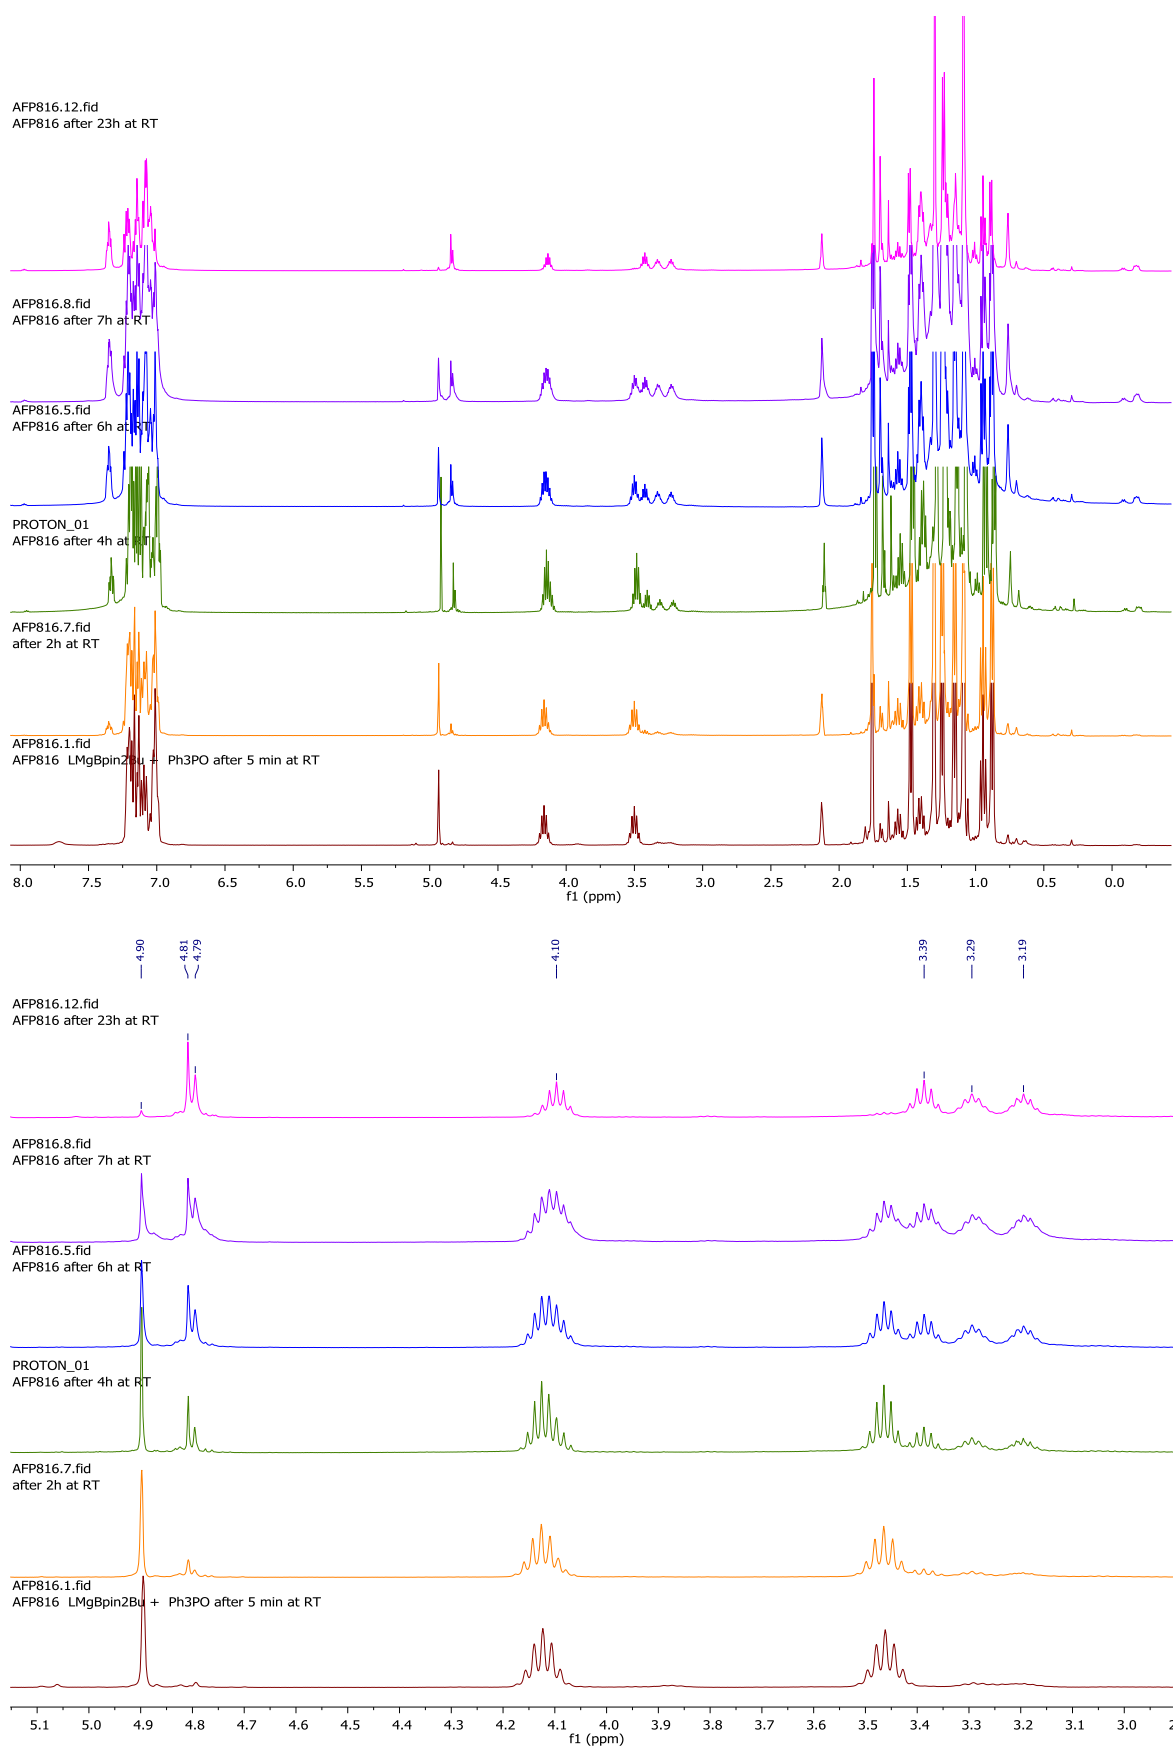

**Figure S4:** Stacked spectra at the various times indicated demonstrating the conversion of compound **11** to compound **12** over 23 hours.

## Synthesis of compound 12

Toluene-*d*<sub>8</sub> (0.5 mL) was added to a mixture of [(BDI)MgBu] (50 mg, 0.1 mmol) and bis(pinacolato)diboron (25.4 mg, 0.1 mmol) in a NMR tube fitted with J. Young tap. After 2 h, 2 equivalents of triphenylphosphine oxide (55.7 mg, 0.2 mmol) were added. After 1 day at RT, the solvent was removed under reduced pressure and the solid was washed with hexane to yield [(BDI)Mg(OBpin)(OPPh<sub>3</sub>)] (**12**) (50 mg, 58%). Colourless crystals suitable for X-ray diffraction studies were obtained from a saturated toluene solution of at RT. <sup>1</sup>H NMR (500 MHz, toluene) δ 7.22-7.18 (m, 8H, CH ar), 7.08-7.01 (m, 13H, CH ar), 4.83 (s, 1H, NC(CH<sub>3</sub>)CH), 4.12 (hept, 2H, *J*<sub>HH</sub> = 6.8 Hz, CH(CH<sub>3</sub>)<sub>2</sub>), 3.41 (hept, 2H, *J*<sub>HH</sub> = 6.8 Hz, CH(CH<sub>3</sub>)<sub>2</sub>), 1.73 (s, 6H, NC(CH<sub>3</sub>)CH), 1.47 (d, 6H, *J*<sub>HH</sub> = 6.8 Hz, CH(CH<sub>3</sub>)<sub>2</sub>), 1.28 (s, 12H, B(OC(CH<sub>3</sub>)<sub>2</sub>)<sub>2</sub>), 1.22 (d, 12H, *J*<sub>HH</sub> = 6.8 Hz, CH(CH<sub>3</sub>)<sub>2</sub>), 0.88 (d, 6H, *J*<sub>HH</sub> = 6.8 Hz, CH(CH<sub>3</sub>)<sub>2</sub>) ppm. <sup>13</sup>C{<sup>1</sup>H} NMR (126 MHz, toluene) δ 167.61 (NC(CH<sub>3</sub>)CH), 146.65, 144.30, 141.96, 132.35 (CH ar), 132.26 (CH ar), 131.95 (CH ar), 128.66 (CH ar), 128.56 (CH ar), 123.93 (CH ar), 123.77 (CH ar), 122.92 (CH ar), 94.68 (NC(CH<sub>3</sub>)CH), 77.92 (B(OC(CH<sub>3</sub>)<sub>2</sub>)<sub>2</sub>), 27.69 (CH(CH<sub>3</sub>)<sub>2</sub>), 27.21 (CH(CH<sub>3</sub>)<sub>2</sub>), 25.78 (B(OC(CH<sub>3</sub>)<sub>2</sub>)<sub>2</sub>), 25.32 (CH(CH<sub>3</sub>)<sub>2</sub>), 24.61 (CH(CH<sub>3</sub>)<sub>2</sub>), 24.45 (CH(CH<sub>3</sub>)<sub>2</sub>), 24.03 (CH(CH<sub>3</sub>)<sub>2</sub>), 23.75 (NC(CH<sub>3</sub>)CH) ppm. <sup>11</sup>B{<sup>1</sup>H} NMR (160 MHz, toluene) δ 20.12 ppm. <sup>31</sup>P{<sup>1</sup>H} NMR (202 MHz, toluene) δ 36.35 ppm. Elemental analysis: Found C, 73.61; H, 8.06 N, 3.34 %. C<sub>53</sub>H<sub>68</sub>BMgN<sub>2</sub>O<sub>4</sub>P requires: C, 73.74; H, 7.94; N, 3.25 %.

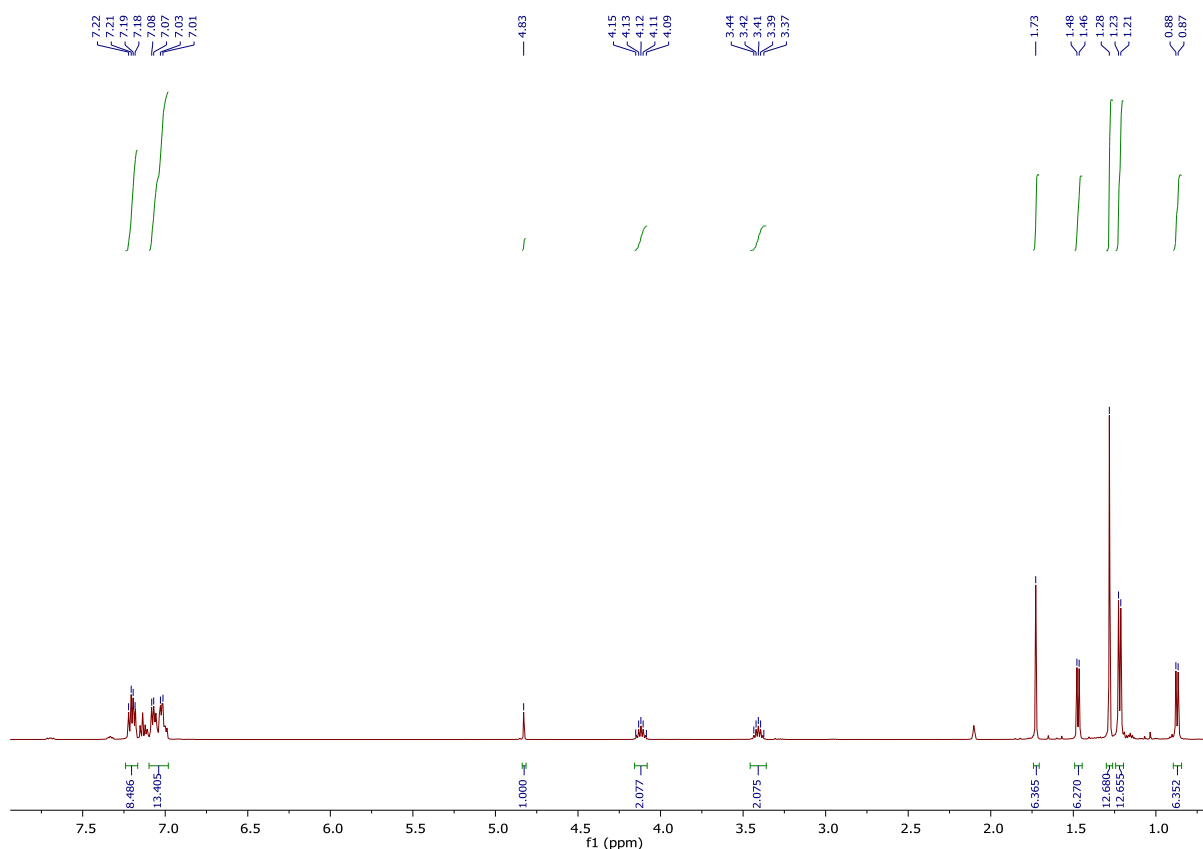

Figure S5: <sup>1</sup>H NMR spectrum of compound 12.

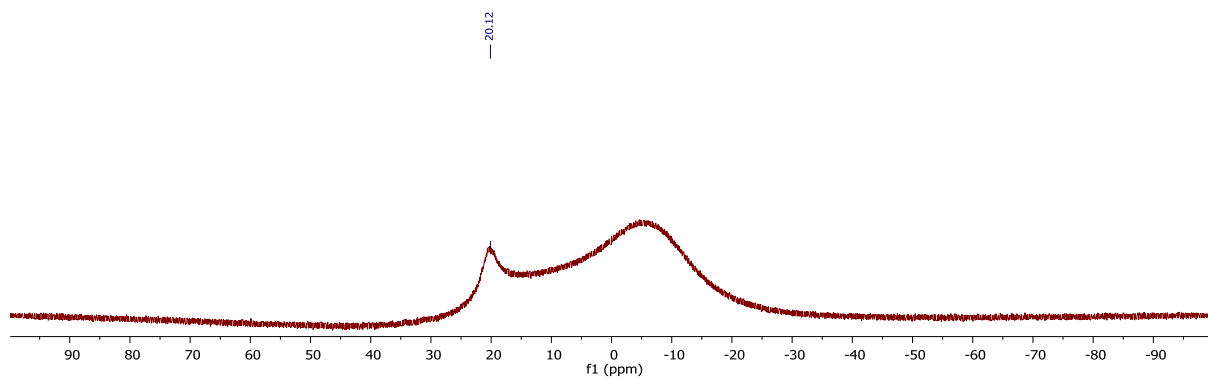

**Figure S6:**  $^{11}\text{B}\{^1\text{H}\}$  of compound **12**.

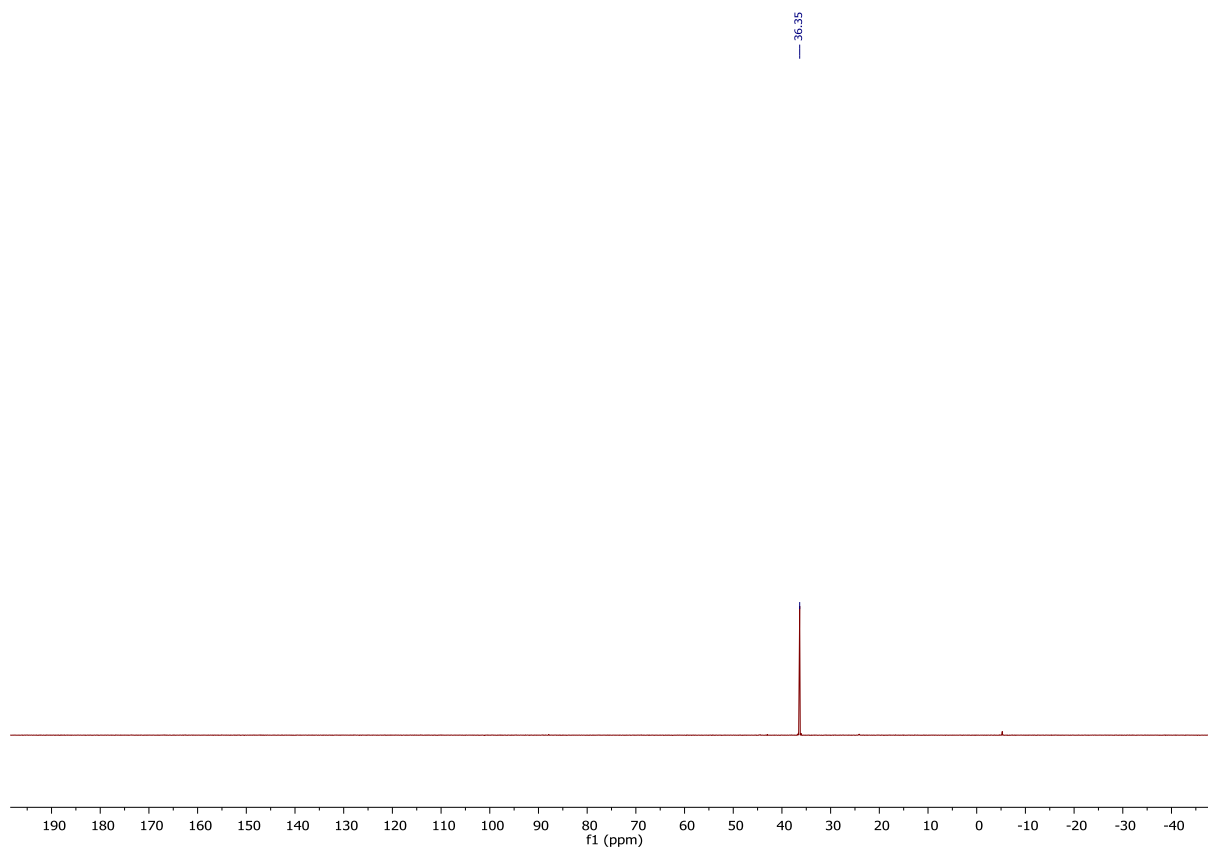

**Figure S7:**  $^{31}\text{P}\{^1\text{H}\}$  NMR spectrum of compound **12**.

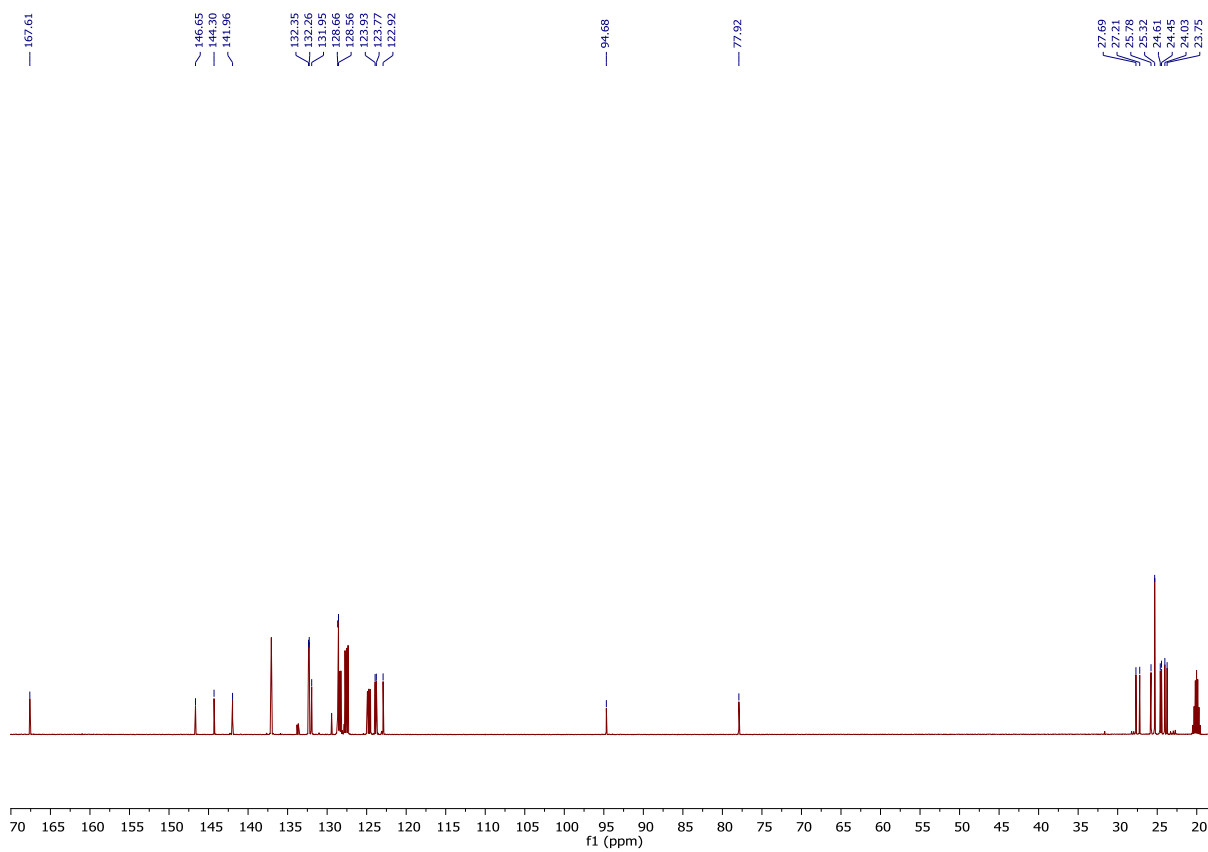

**Figure S8:**  $^{13}\text{C}\{^1\text{H}\}$  NMR spectrum of compound **12**.

## Reaction of compound **10** and Ph<sub>3</sub>PO

Toluene-*d*<sub>8</sub> (0.5 mL) was added to a mixture of [(BDI)MgBpin(DMAP)] (**10**) (20 mg, 0.03 mmol) and triphenylphosphine oxide (8.0 mg, 0.03 mmol) in a NMR tube fitted with a J. Young tap. The reaction was monitored by NMR over 24 h. The NMR spectra showed the formation of [(BDI)Mg(Bpin)(OPPh<sub>3</sub>)] (**11**), [(BDI)Mg(OBpin)(OPPh<sub>3</sub>)] (**12**) and unreacted compound **10**.

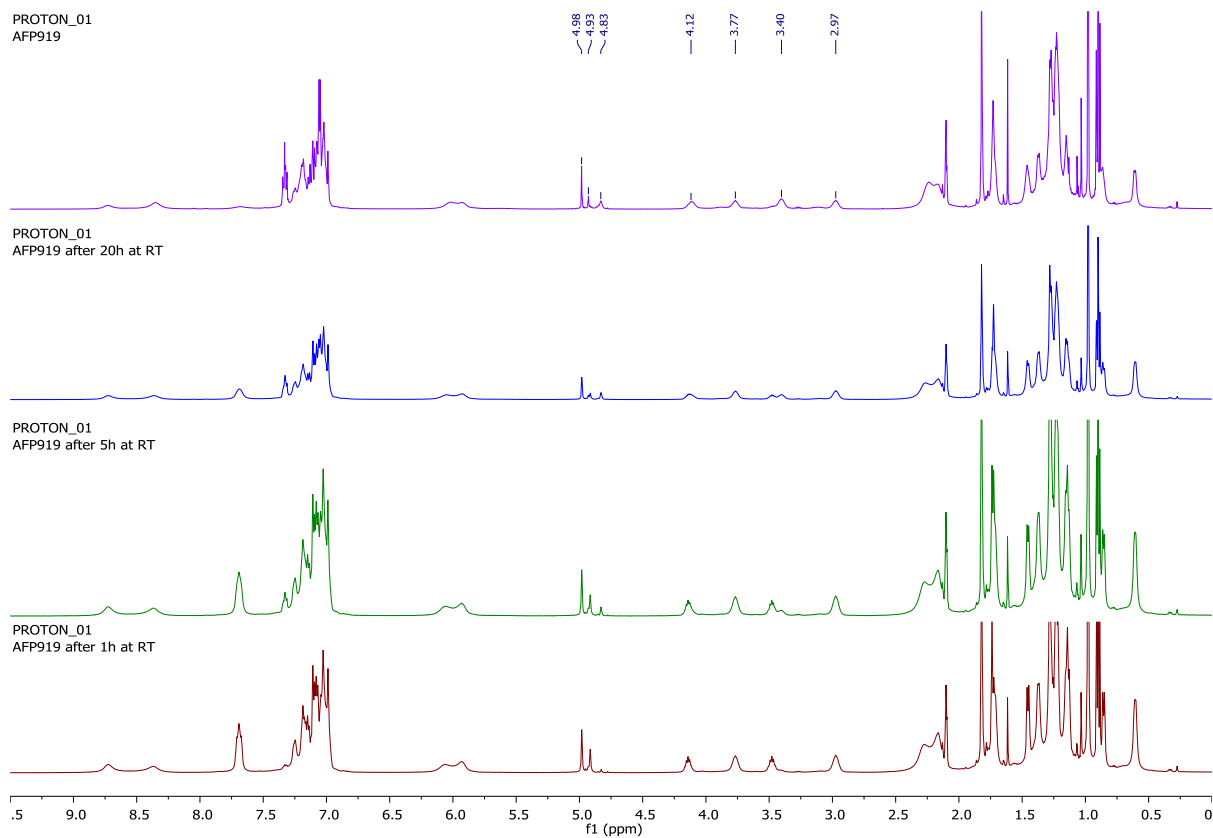

**Figure S9:** Stacked <sup>1</sup>H NMR spectra recorded at the times indicated of the reaction of compound **10** and Ph<sub>3</sub>PO.



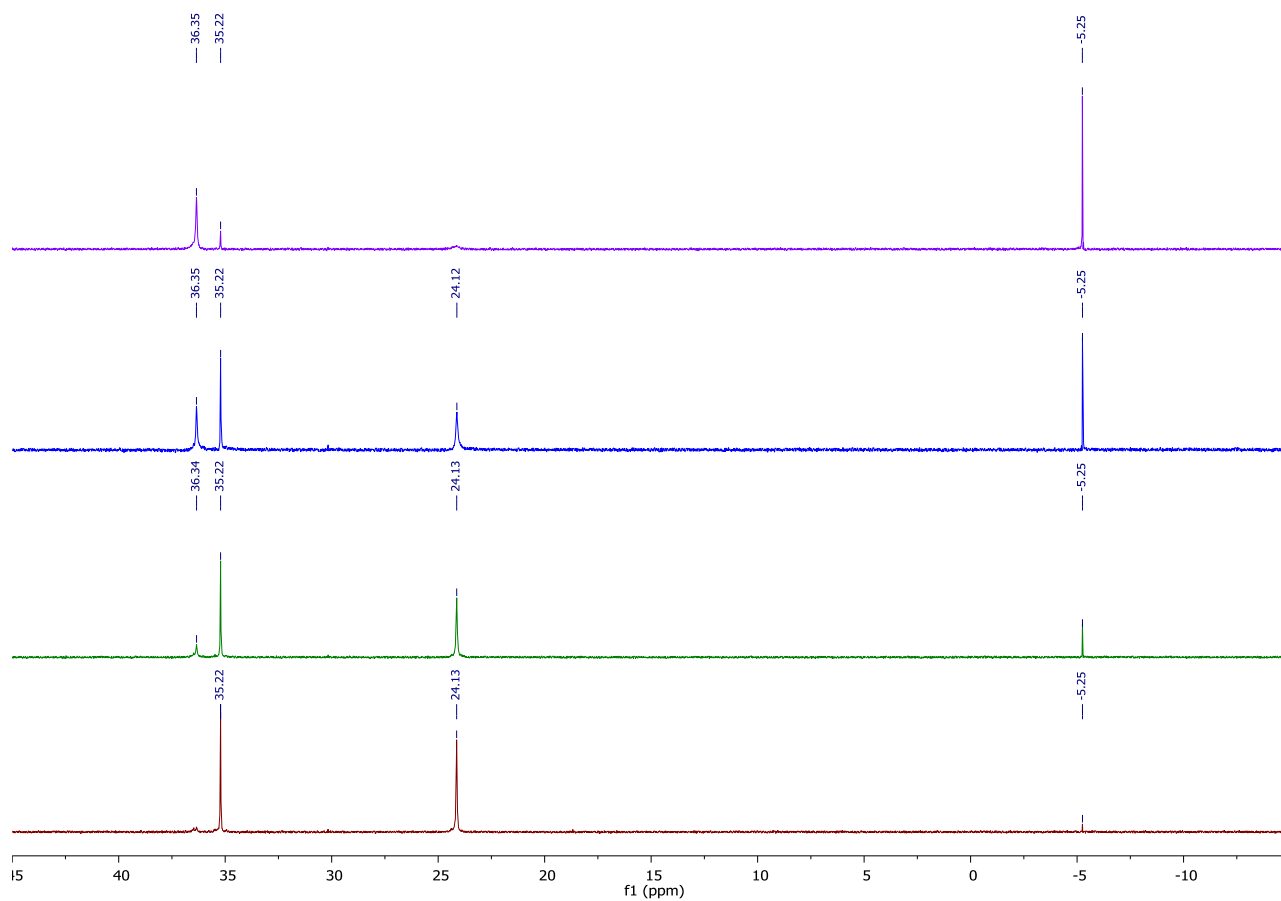

**Figure S10:** Stacked  $^{31}\text{P}\{^1\text{H}\}$  NMR spectra recorded over the same time period as the data shown in Figure S9 of the reaction of compound **10** and  $\text{Ph}_3\text{PO}$ .

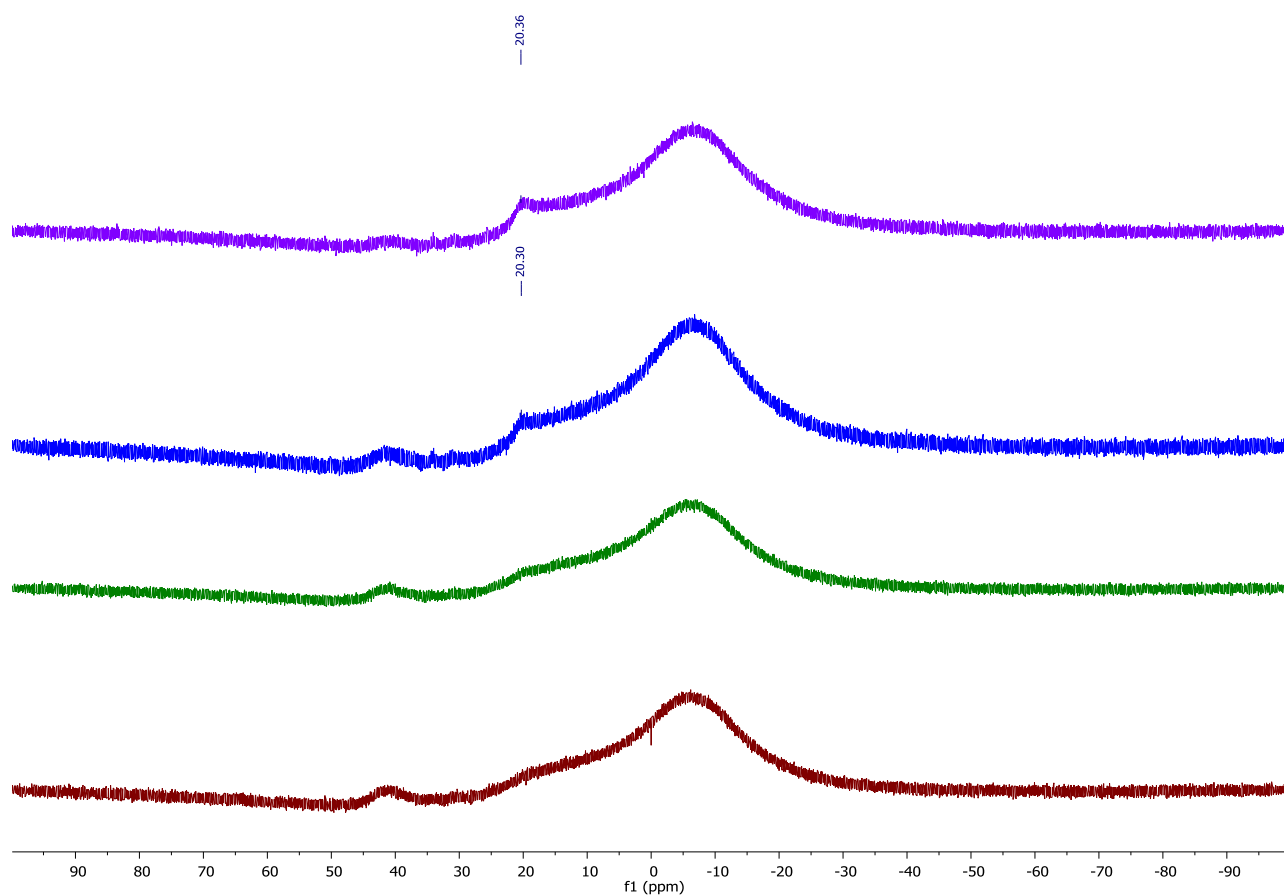

**Figure S11:** Stacked  $^{11}\text{B}\{^1\text{H}\}$  NMR spectra recorded over the same time period as the data shown in Figure S9 of the reaction of compound **10** and  $\text{Ph}_3\text{PO}$ .

### Single Crystal X-ray Diffraction analysis.

Single Crystal X-ray diffraction data for compounds **11** and **12** were collected using CuK $\alpha$  ( $\lambda = 1.54184$  Å) radiation on a SuperNova, Dual Cu at zero, EosS2 diffractometer. The crystals were kept at 150(2) K during data collections. The structures were solved using Olex2,<sup>2</sup> and refined with the ShelXL<sup>3</sup> refinement package using Least Squares minimisation.

The asymmetric unit in **11** comprises 2 molecules. The data were integrated for this structure in a manner that takes account of 54% sample twinning by virtue of a 180° rotation about the 1 0 0 reciprocal direction. However, raw data frames were not as clean as one might hope with some smearing of electron density in evidence. Both molecules in the asymmetric unit have similar compositions, but the highest residual electron density peak is located at 1.62 Å from Mg2, and close to B2, and has resulted in distortion of the ADPs pertaining to the latter atom. Indeed, analysis of the ADPs pinacolato ligand based on B2 suggested (since they are larger than those for the corresponding ligand containing B1) that there might be some ligand disorder involving the moiety based on B2 – possibly with a hydroxide moiety based on the highest residual electron density peak. However, efforts to model such a disorder suggested that it would be, at best, in the region of 6%. As such these were abandoned due to a lack of credibility. On balance, given the quality of the data, it appears that the residual electron density is, in fact, spurious.

The asymmetric unit of compound **12** comprises 2 molecules.

**Table S1:** Single Crystal X-ray Data Parameters for compounds **11** and **12**.

| Compound                                                      | <b>11</b>                                                                     | <b>12</b>                                                                                                     |
|---------------------------------------------------------------|-------------------------------------------------------------------------------|---------------------------------------------------------------------------------------------------------------|
| Empirical formula                                             | C <sub>53</sub> H <sub>68</sub> BMgN <sub>2</sub> O <sub>3</sub> P            | C <sub>106</sub> H <sub>136</sub> B <sub>2</sub> Mg <sub>2</sub> N <sub>4</sub> O <sub>3</sub> P <sub>2</sub> |
| Formula weight                                                | 847.18                                                                        | 1726.36                                                                                                       |
| Temperature/K                                                 | 150.00(10)                                                                    | 149.9(5)                                                                                                      |
| Crystal system                                                | monoclinic                                                                    | monoclinic                                                                                                    |
| Space group                                                   | <i>P2<sub>1</sub>/c</i>                                                       | <i>P2<sub>1</sub>/c</i>                                                                                       |
| <i>a</i> /Å                                                   | 35.0861(6)                                                                    | 35.0559(10)                                                                                                   |
| <i>b</i> /Å                                                   | 13.1244(2)                                                                    | 13.3465(2)                                                                                                    |
| <i>c</i> /Å                                                   | 22.2626(4)                                                                    | 22.2186(7)                                                                                                    |
| $\alpha$ /°                                                   | 90                                                                            | 90                                                                                                            |
| $\beta$ /°                                                    | 100.785(2)                                                                    | 100.589(3)                                                                                                    |
| $\gamma$ /°                                                   | 90                                                                            | 90                                                                                                            |
| Volume/Å <sup>3</sup>                                         | 10070.5(3)                                                                    | 10218.5(5)                                                                                                    |
| <i>Z</i>                                                      | 8                                                                             | 4                                                                                                             |
| $\rho_{\text{calc}}$ g/cm <sup>3</sup>                        | 1.118                                                                         | 1.122                                                                                                         |
| $\mu$ /mm <sup>-1</sup>                                       | 0.921                                                                         | 0.932                                                                                                         |
| F(000)                                                        | 3648.0                                                                        | 3712.0                                                                                                        |
| Crystal size/mm <sup>3</sup>                                  | 0.296 × 0.137 × 0.095                                                         | 0.096 × 0.065 × 0.035                                                                                         |
| Radiation                                                     | CuK $\alpha$ ( $\lambda$ = 1.54184 Å)                                         | CuK $\alpha$ ( $\lambda$ = 1.54184 Å)                                                                         |
| 2 $\Theta$ range for data collection/°                        | 7.208 to 147.52                                                               | 5.13 to 145.054                                                                                               |
| Index ranges                                                  | -42 ≤ <i>h</i> ≤ 43, -16 ≤ <i>k</i> ≤ 16, -27 ≤ <i>l</i> ≤ 27                 | -43 ≤ <i>h</i> ≤ 42, -12 ≤ <i>k</i> ≤ 16, -26 ≤ <i>l</i> ≤ 27                                                 |
| Reflections collected                                         | 22453                                                                         | 67342                                                                                                         |
| Independent reflections                                       | 22453 [ <i>R</i> <sub>int</sub> = 0.0971, <i>R</i> <sub>sigma</sub> = 0.0922] | 19993 [ <i>R</i> <sub>int</sub> = 0.0589, <i>R</i> <sub>sigma</sub> = 0.0619]                                 |
| Data/restraints/parameters                                    | 22453/1/1128                                                                  | 19993/0/1145                                                                                                  |
| Goodness-of-fit on F <sup>2</sup>                             | 1.079                                                                         | 1.014                                                                                                         |
| Final <i>R</i> indexes [ <i>I</i> >= 2 $\sigma$ ( <i>I</i> )] | <i>R</i> <sub>1</sub> = 0.0856, <i>wR</i> <sub>2</sub> = 0.1973               | <i>R</i> <sub>1</sub> = 0.0535, <i>wR</i> <sub>2</sub> = 0.1226                                               |
| Final <i>R</i> indexes [all data]                             | <i>R</i> <sub>1</sub> = 0.0951, <i>wR</i> <sub>2</sub> = 0.2025               | <i>R</i> <sub>1</sub> = 0.0897, <i>wR</i> <sub>2</sub> = 0.1410                                               |
| Largest diff. peak/hole / e Å <sup>-3</sup>                   | 0.68/-0.39                                                                    | 0.47/-0.30                                                                                                    |

## Computational Details / Methodology

DFT calculations were run with Gaussian 09 (Revision D.01).<sup>4</sup> The Mg and P centers were described with the Stuttgart RECPs and associated basis sets,<sup>5</sup> and 6-31G\*\* basis sets were used for all other atoms (BS1).<sup>6</sup> A polarisation function was also added to P ( $\zeta_d = 0.387$ ). Initial BP86<sup>7</sup> optimisations were performed using the ‘grid = ultrafine’ option, with all stationary points being fully characterized via analytical frequency calculations as either minima (all positive eigenvalues) or transition states (one negative eigenvalue). IRC calculations and subsequent geometry optimizations were used to confirm the minima linked by each transition state. All energies were recomputed with a larger basis set featuring 6-311++G\*\* basis sets on all atoms (BS2). Corrections for the effect of toluene ( $\epsilon = 2.3741$ ) solvent were run using the polarizable continuum model and BS1.<sup>8</sup> Single-point dispersion corrections to the BP86 results employed Grimme’s D3 parameter set with Becke-Johnson damping as implemented in Gaussian.<sup>9</sup> The BP86-optimised geometries of **A** and **G** were used for the NBO (Natural Bonding Orbital) studies (see Table S2) to generate molecular orbital pictures.

### Breakdown of Energy Contributions

The following tables detail the evolution of the relative energies as the successive corrections to the initial SCF energy are included. Terms used are:

|                         |                                                                                   |
|-------------------------|-----------------------------------------------------------------------------------|
| $\Delta E_{BS1}$        | SCF energy computed with the BP86 functional with BS1                             |
| $\Delta H_{BS1}$        | Enthalpy at 0 K with BS1                                                          |
| $\Delta G_{BS1}$        | Free energy at 298.15 K and 1 atm with BS1                                        |
| $\Delta G_{BS1/tol}$    | Free energy corrected for toluene solvent with BS1                                |
| $\Delta G_{BS1/tol+D3}$ | Free energy corrected for toluene and dispersion effects with BS1                 |
| $\Delta E_{BS2}$        | SCF energy computed with the BP86 functional with BS2                             |
| $\Delta G_{tol}$        | Free energy corrected for basis set (BS2), dispersion effects and toluene solvent |

In each case the final data used in the main article are highlighted in bold.

**Table S2** – Relative energies (kcal/mol) for computed structures. Data in bold are those used in the main text. All energies are quoted relative to **9** at 0.0 kcal/mol.

|                  | $\Delta E_{BS1}$ | $\Delta H_{BS1}$ | $\Delta G_{BS1}$ | $\Delta G_{BS1/tol}$ | $\Delta G_{BS1/tol+D3}$ | $\Delta E_{BS2}$ | $\Delta G_{tol}$ |
|------------------|------------------|------------------|------------------|----------------------|-------------------------|------------------|------------------|
| <b>9</b>         | 0.0              | 0.0              | 0.0              | 0.0                  | 0.0                     | 0.0              | <b>0.0</b>       |
| <b>A</b>         | +1.8             | +2.4             | +17.0            | +18.9                | -8.3                    | +4.3             | <b>-5.7</b>      |
| <b>TS(A-11)</b>  | +21.7            | +22.3            | +37.9            | +41.3                | +10.4                   | +25.8            | <b>+14.5</b>     |
| <b>11</b>        | -10.9            | -11.8            | -16.5            | -13.5                | -5.3                    | -12.0            | <b>-6.5</b>      |
| <b>B</b>         | -8.7             | -9.0             | -1.8             | +1.2                 | +3.5                    | -8.9             | <b>+3.2</b>      |
| <b>TS(B-C)</b>   | +19.8            | +18.4            | +31.6            | +36.2                | +12.3                   | +23.0            | <b>+15.4</b>     |
| <b>C</b>         | -82.0            | -81.5            | -75.7            | -71.9                | -70.9                   | -77.0            | <b>-65.9</b>     |
| <b>12</b>        | -87.9            | -88.2            | -93.4            | -89.3                | -79.3                   | -83.6            | <b>-75.0</b>     |
| <b>TS(9-D)</b>   | +15.3            | +14.8            | +13.5            | +14.9                | +18.4                   | +16.2            | <b>+19.4</b>     |
| <b>D</b>         | +6.8             | +6.1             | +1.8             | +2.7                 | +11.4                   | +6.6             | <b>+11.2</b>     |
| <b>E</b>         | +1.0             | -0.4             | -21.2            | -22.2                | +16.5                   | -2.6             | <b>+12.9</b>     |
| <b>TS(11-F)</b>  | +23.7            | +21.5            | +18.9            | +20.6                | +25.8                   | +25.5            | <b>+27.7</b>     |
| <b>F</b>         | -67.9            | -68.4            | -80.6            | -81.0                | -45.5                   | -65.7            | <b>-43.3</b>     |
| <b>G</b>         | -3.8             | -3.4             | +7.4             | +9.0                 | -0.7                    | -1.6             | <b>+1.5</b>      |
| <b>TS(G-H)</b>   | +25.6            | +25.9            | +42.7            | +46.0                | +17.3+                  | 33.1             | <b>24.7</b>      |
| <b>H</b>         | -67.8            | -67.4            | -69.5            | -67.8                | -61.1                   | -61.0            | <b>-54.3</b>     |
| <b>TS(H-I)</b>   | -62.6            | -62.6            | -64.3            | -62.5                | -55.9                   | -56.9            | <b>-50.1</b>     |
| <b>I</b>         | -69.2            | -69.4            | -75.3            | -72.6                | -61.7                   | -64.8            | <b>-57.3</b>     |
| <b>J</b>         | -66.1            | -66.8            | -49.2            | -87.9                | -49.2                   | -64.4            | <b>-47.5</b>     |
| <b>A'</b>        | +18.8            | +19.1            | +34.5            | +35.2                | +6.5                    | +20.6            | <b>+8.4</b>      |
| <b>TS(A'-11)</b> | +25.8            | +26.6            | +43.2            | +46.7                | +13.5                   | +29.2            | <b>+16.8</b>     |

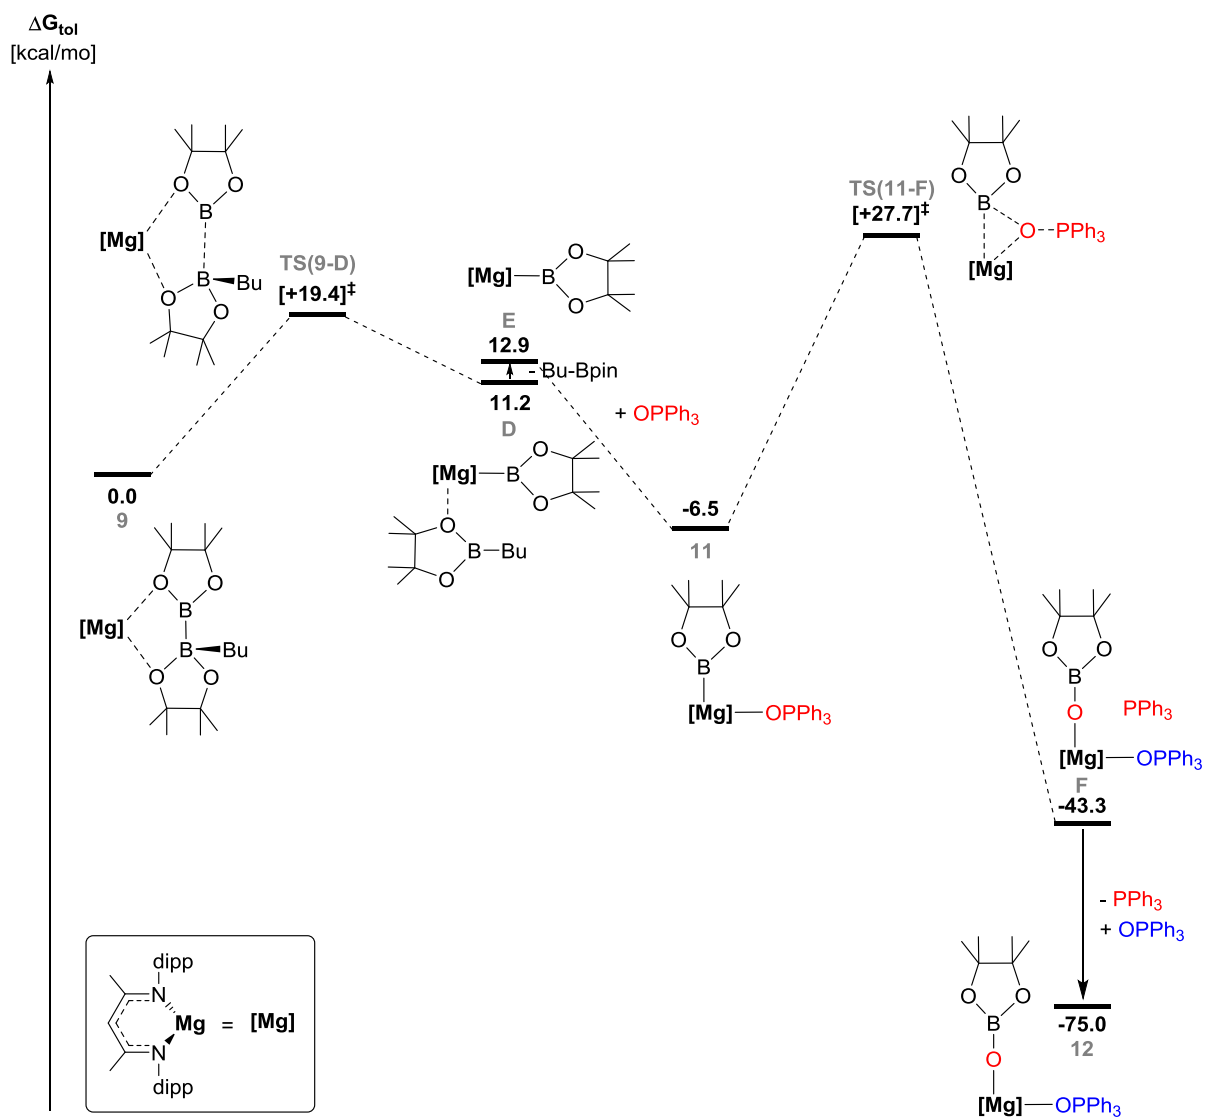

**Figure S12:** DFT calculated free energy (kcal mol<sup>-1</sup>) profile for the reaction of **9** with OPPh<sub>3</sub> (Pathway **II**), relative to **9** + OPPh<sub>3</sub>.

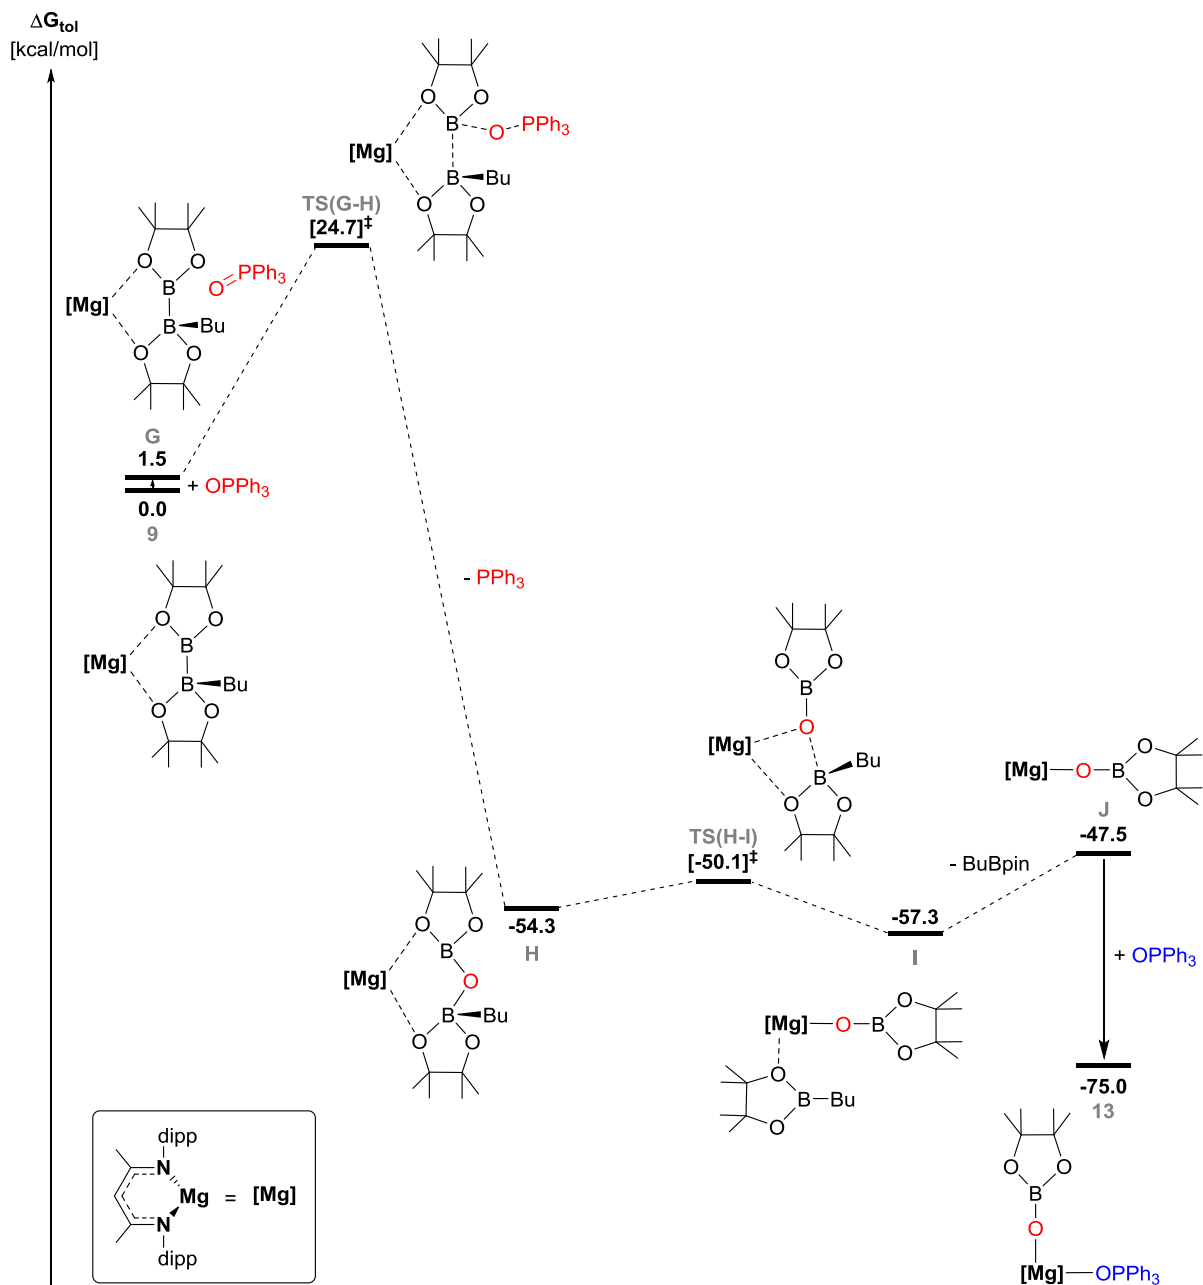

**Figure S13:** – DFT calculated free energy (kcal mol<sup>-1</sup>) profile for the reaction of **9** with OPPh<sub>3</sub> (Pathway **III**), relative to **9** + OPPh<sub>3</sub>.



**Table S3:** Energies (eV) of the frontier molecular orbitals computed for **A**, **A'** and **G**.

| Structure                                                                                       | HOMO  | LUMO  | LUMO+11 |
|-------------------------------------------------------------------------------------------------|-------|-------|---------|
| 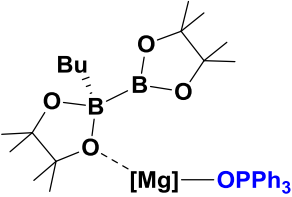<br><b>A</b>   | -3.39 | -2.44 | +0.19   |
| <br><b>A'</b> | -2.97 | -2.42 | -0.06   |
| <br><b>G</b> | -3.92 | -2.15 | -1.06   |

DFT- computed geometries for the reaction of **9** with  $\text{OPPh}_3$ , relative to **9** and the free substrates. Bond lengths given in Ångstroms.

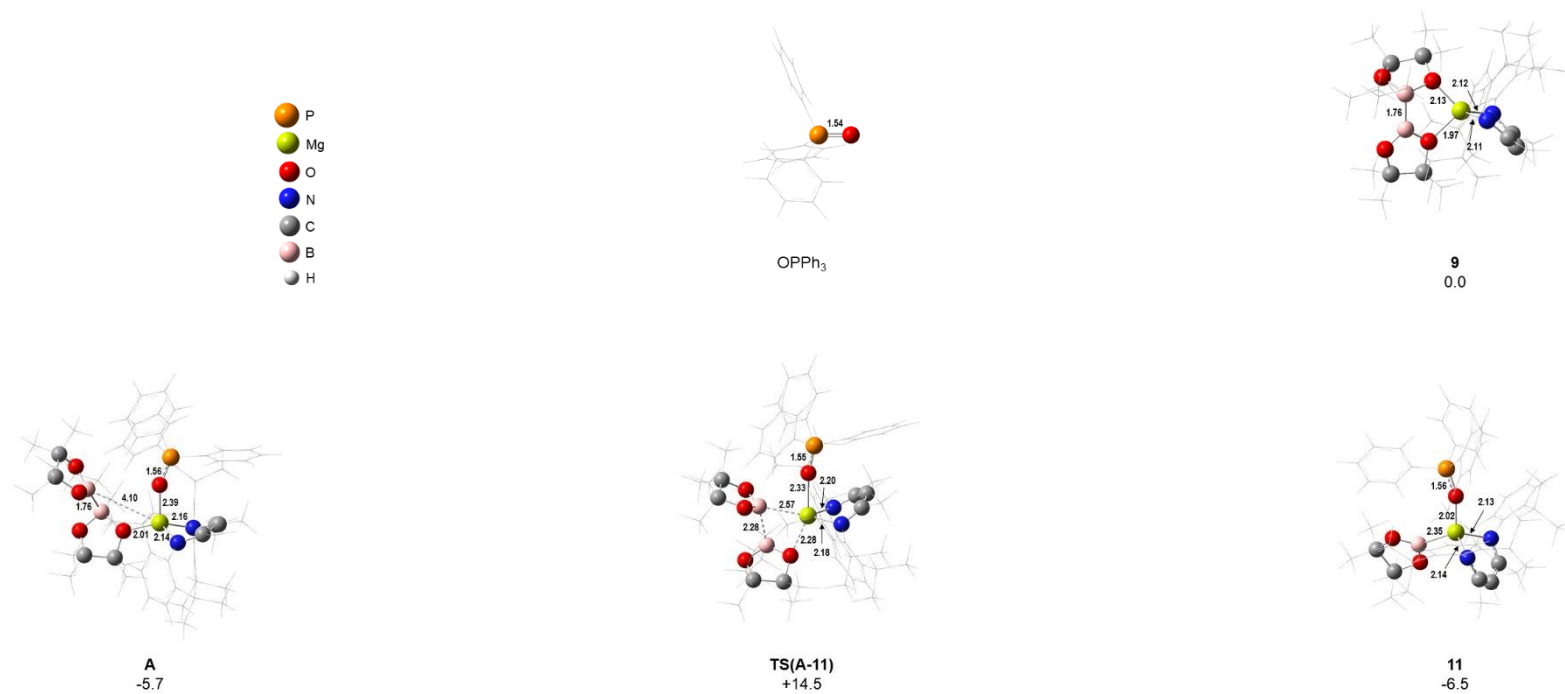

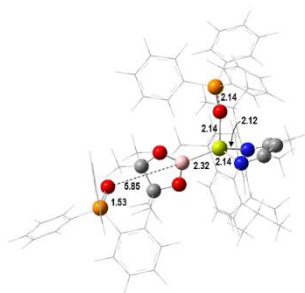

**B**  
+3.2

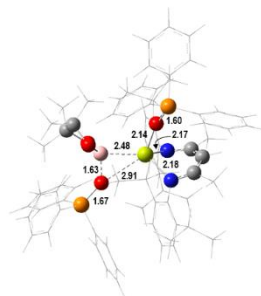

**TS(B-C)**  
+15.4

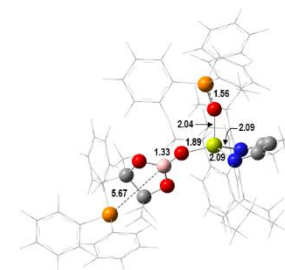

**C**  
-65.9

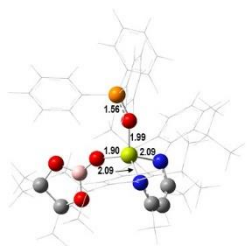

**12**  
-75.0

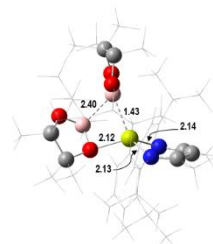

**TS(9-D)**  
+19.4

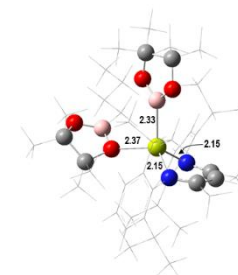

**D**  
+11.1

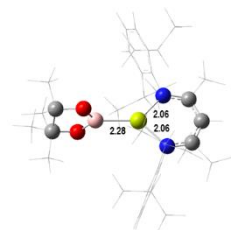

**E**  
+12.9

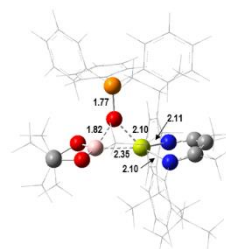

**TS(11-F)**  
+27.7

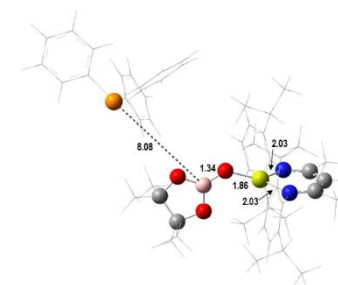

**F**  
-43.3

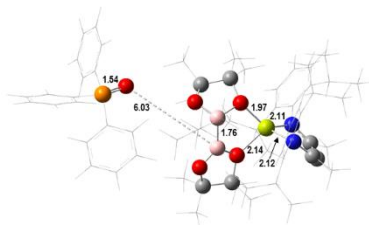

**G**  
+1.5

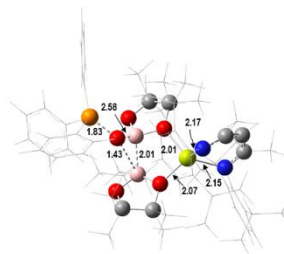

**TS(G-H)**  
+24.7

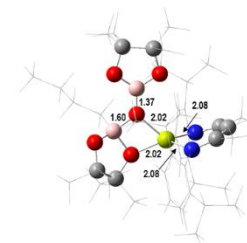

**H**  
-54.3

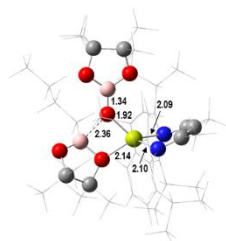

**TS(H-I)**  
-50.1

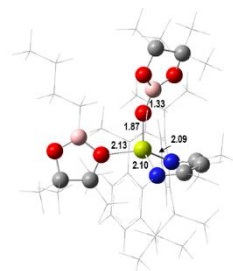

**I**  
-57.3

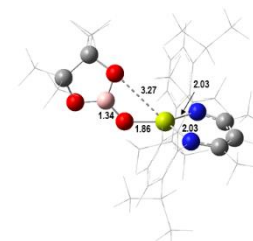

**J**  
-47.5

**Cartesian Coordinates and Computed Energies (in Hartrees)**

**OPPh3**

SCF (BP86) Energy = -776.746378277  
Enthalpy 0K = -776.476359  
Energy 298K = -776.458922  
Free Energy 298K = -776.524191  
Lowest Frequency = 14.8482 cm<sup>-1</sup>  
Second Frequency = 33.8839 cm<sup>-1</sup>  
SCF (BP86-D3BJ) Energy = -776.830662556  
SCF (Toluene) Energy = -776.7518488  
SCF (BS2) Energy = -1111.774142

|   |          |          |          |
|---|----------|----------|----------|
| P | 0.01177  | -0.02685 | 0.93614  |
| C | -0.33727 | 1.66995  | 0.28447  |
| C | 0.69542  | 2.49879  | -0.19919 |
| C | -1.65011 | 2.18103  | 0.38068  |
| C | 0.41694  | 3.81889  | -0.58819 |
| H | 1.71633  | 2.11095  | -0.27195 |
| C | -1.92427 | 3.49993  | -0.00909 |
| H | -2.45614 | 1.54495  | 0.76148  |
| C | -0.89138 | 4.31969  | -0.49521 |
| H | 1.22398  | 4.45631  | -0.96453 |
| H | -2.94515 | 3.88881  | 0.06663  |
| H | -1.10699 | 5.34924  | -0.79991 |
| C | 1.61361  | -0.54824 | 0.16476  |
| C | 2.67604  | -0.81986 | 1.04850  |
| C | 1.79903  | -0.70021 | -1.22445 |
| C | 3.91945  | -1.23451 | 0.54442  |
| H | 2.50299  | -0.70774 | 2.12401  |
| C | 3.04292  | -1.11480 | -1.72371 |
| H | 0.97425  | -0.50434 | -1.91768 |
| C | 4.10358  | -1.38068 | -0.83997 |
| H | 4.74374  | -1.44581 | 1.23378  |
| H | 3.18447  | -1.23425 | -2.80312 |
| H | 5.07273  | -1.70615 | -1.23279 |
| C | -1.29017 | -1.10896 | 0.18819  |
| C | -1.74903 | -2.18257 | 0.97720  |
| C | -1.81162 | -0.91894 | -1.10806 |
| C | -2.70985 | -3.06879 | 0.46632  |
| H | -1.35248 | -2.29757 | 1.99141  |
| C | -2.77128 | -1.80907 | -1.61573 |
| H | -1.48712 | -0.06535 | -1.71308 |
| C | -3.21781 | -2.88540 | -0.83067 |
| H | -3.06626 | -3.90064 | 1.08299  |
| H | -3.17694 | -1.65725 | -2.62164 |
| H | -3.96861 | -3.57674 | -1.22788 |
| O | 0.05994  | -0.14365 | 2.46606  |

**PPh3**

SCF (BP86) Energy = -701.502630498  
Enthalpy 0K = -701.237091  
Energy 298K = -701.220600  
Free Energy 298K = -701.284016  
Lowest Frequency = 23.5594 cm<sup>-1</sup>  
Second Frequency = 24.5927 cm<sup>-1</sup>  
SCF (BP86-D3BJ) Energy = -701.583032914  
SCF (Toluene) Energy = -701.5053263  
SCF (BS2) Energy = -1036.4965495

|   |          |          |          |
|---|----------|----------|----------|
| P | -0.00005 | 0.00008  | -1.25095 |
| C | -1.48732 | 0.77415  | -0.41579 |
| C | -2.09251 | 0.27954  | 0.75880  |
| C | -2.04470 | 1.91145  | -1.04201 |
| C | -3.22314 | 0.91529  | 1.29858  |
| H | -1.67956 | -0.60836 | 1.24837  |

|   |          |          |          |
|---|----------|----------|----------|
| C | -3.16715 | 2.55214  | -0.49585 |
| H | -1.59593 | 2.29325  | -1.96667 |
| C | -3.76068 | 2.05326  | 0.67574  |
| H | -3.68463 | 0.51894  | 2.20973  |
| H | -3.58512 | 3.43503  | -0.99140 |
| H | -4.64304 | 2.54601  | 1.09771  |
| C | 0.07314  | -1.67506 | -0.41594 |
| C | -0.63792 | -2.72490 | -1.03931 |
| C | 0.80867  | -1.95358 | 0.75533  |
| C | -0.63183 | -4.01739 | -0.49341 |
| H | -1.19654 | -2.52587 | -1.96153 |
| C | 0.82316  | -3.25078 | 1.29477  |
| H | 1.37498  | -1.15327 | 1.24254  |
| C | 0.10156  | -4.28368 | 0.67495  |
| H | -1.19128 | -4.81957 | -0.98667 |
| H | 1.40078  | -3.45360 | 2.20334  |
| H | 0.11574  | -5.29430 | 1.09671  |
| C | 1.41421  | 0.90093  | -0.41604 |
| C | 2.67860  | 0.81110  | -1.04024 |
| C | 1.28795  | 1.67639  | 0.75577  |
| C | 3.79488  | 1.46286  | -0.49459 |
| H | 2.78530  | 0.22842  | -1.96288 |
| C | 2.40409  | 2.33778  | 1.29495  |
| H | 0.31197  | 1.76580  | 1.24367  |
| C | 3.65909  | 2.23036  | 0.67431  |
| H | 4.76905  | 1.38027  | -0.98850 |
| H | 2.29116  | 2.93882  | 2.20395  |
| H | 4.52719  | 2.74817  | 1.09584  |

**pinBBu**

SCF (BP86) Energy = -569.123611712  
Enthalpy 0K = -568.827988  
Energy 298K = -568.812028  
Free Energy 298K = -568.871243  
Lowest Frequency = 17.1704 cm<sup>-1</sup>  
Second Frequency = 53.5444 cm<sup>-1</sup>  
SCF (BP86-D3BJ) Energy = -569.174139919  
SCF (Toluene) Energy = -569.1253858  
SCF (BS2) Energy = -569.2678874

|   |          |          |          |
|---|----------|----------|----------|
| O | -0.18305 | 0.73253  | -0.38834 |
| O | -0.86951 | -1.32347 | 0.42112  |
| C | -2.09599 | -0.61210 | 0.04700  |
| C | -3.15582 | -0.87889 | 1.12040  |
| H | -3.40478 | -1.95269 | 1.13677  |
| H | -4.08207 | -0.31829 | 0.90599  |
| H | -2.79911 | -0.59817 | 2.12257  |
| C | -2.54735 | -1.19515 | -1.30416 |
| H | -1.79553 | -1.01106 | -2.08925 |
| H | -3.50914 | -0.76724 | -1.63327 |
| H | -2.67043 | -2.28533 | -1.19994 |
| C | -1.60239 | 0.88915  | -0.05321 |
| C | -2.26940 | 1.72271  | -1.15177 |
| H | -1.83383 | 2.73533  | -1.16517 |
| H | -3.35299 | 1.82110  | -0.96653 |
| H | -2.12221 | 1.27698  | -2.14680 |
| C | -1.65437 | 1.63823  | 1.29025  |
| H | -1.17970 | 1.05048  | 2.09310  |
| H | -2.69058 | 1.86818  | 1.58994  |
| H | -1.10320 | 2.58745  | 1.19199  |
| B | 0.19900  | -0.53545 | 0.02071  |
| C | 1.69301  | -1.04253 | 0.01354  |
| H | 1.83638  | -1.74504 | 0.85777  |
| H | 1.83299  | -1.66832 | -0.89336 |
| C | 2.76817  | 0.06373  | 0.04105  |
| H | 2.59358  | 0.76699  | -0.79542 |
| H | 2.65519  | 0.66794  | 0.96249  |

C 4.20766 -0.47434 -0.03506  
H 4.32236 -1.07274 -0.96046  
H 4.37762 -1.17954 0.80230  
C 5.27348 0.63191 -0.00156  
H 6.29435 0.21687 -0.05980  
H 5.14848 1.33229 -0.84657  
H 5.20603 1.22336 0.92902

**9**

SCF (BP86) Energy = -2220.57991976  
Enthalpy 0K = -2219.487760  
Enthalpy 298K = -2219.422702  
Free Energy 298K = -2219.583101  
Lowest Frequency = 18.9735 cm<sup>-1</sup>  
Second Frequency = 26.5885 cm<sup>-1</sup>  
SCF (BP86-D3BJ) Energy = -2220.90416121  
SCF (Toluene) Energy = -2220.58694528  
SCF (BS2) Energy = -2420.36376068

Mg -0.34476 0.01378 -0.18714  
O 1.54140 -2.22807 2.66404  
O 0.23112 -0.49946 1.62808  
O 2.35893 -3.05123 -0.58702  
O 0.47307 -1.78737 -0.98025  
N 0.51453 1.72437 -1.09139  
N -2.31856 0.35138 -0.85786  
C 0.52128 3.21091 -3.10961  
H 1.23137 3.83727 -2.55179  
H -0.27347 3.84981 -3.52516  
H 1.06303 2.76611 -3.96307  
C -0.07685 2.11136 -2.23709  
C -1.29747 1.57224 -2.73842  
H -1.55178 1.93263 -3.74029  
C -2.37621 0.92362 -2.08493  
C -3.68846 0.97689 -2.86537  
H -4.44482 0.28346 -2.47490  
H -3.49885 0.74795 -3.92734  
H -4.11693 1.99339 -2.83081  
C -3.58012 0.07622 -0.19956  
C -4.27991 1.13606 0.45445  
C -5.50795 0.85688 1.08681  
H -6.04588 1.67243 1.58322  
C -6.05569 -0.42852 1.09327  
H -7.01385 -0.62228 1.58673  
C -5.36109 -1.46468 0.46179  
H -5.78584 -2.47393 0.46235  
C -4.12896 -1.24233 -0.18402  
C -3.45154 -2.41490 -0.89197  
H -2.39781 -2.12895 -1.05143  
C -4.08901 -2.67981 -2.27744  
H -5.16444 -2.90677 -2.16873  
H -3.61217 -3.54568 -2.76980  
H -3.99583 -1.81357 -2.95154  
C -3.47321 -3.71728 -0.06284  
H -4.49158 -4.13664 0.01548  
H -3.09036 -3.56385 0.95815  
H -2.84912 -4.48910 -0.54735  
C -3.75936 2.57485 0.51098  
H -2.77726 2.60376 0.00859  
C -4.69983 3.55854 -0.22462  
H -5.68564 3.61324 0.27025  
H -4.87252 3.26009 -1.27138  
H -4.27065 4.57572 -0.22645  
C -3.56264 3.03956 1.97213  
H -4.51365 3.02218 2.53234  
H -3.18275 4.07550 2.00169  
H -2.84709 2.39704 2.51180

C 1.66127 2.46199 -0.59421  
C 1.46942 3.35241 0.50686  
C 2.58182 4.02219 1.04927  
H 2.43604 4.70200 1.89370  
C 3.86843 3.84311 0.53151  
H 4.72197 4.36877 0.97182  
C 4.04690 2.99050 -0.55883  
H 5.05064 2.85487 -0.97631  
C 2.96910 2.29261 -1.14167  
C 0.07563 3.66519 1.05162  
H -0.55049 2.76348 0.91397  
C -0.57072 4.80491 0.22652  
H 0.04535 5.71953 0.28797  
H -1.57765 5.04808 0.60918  
H -0.66802 4.53353 -0.83720  
C 0.06676 4.02383 2.55137  
H 0.61356 3.27809 3.15151  
H -0.96954 4.07474 2.92381  
H 0.52274 5.01173 2.74049  
C 3.28221 1.39866 -2.34317  
H 2.32990 0.97938 -2.70761  
C 4.20878 0.22372 -1.95175  
H 4.44417 -0.39762 -2.83533  
H 3.76039 -0.42235 -1.18001  
H 5.16769 0.59505 -1.55095  
C 3.92666 2.19470 -3.50432  
H 3.32408 3.07013 -3.79544  
H 4.04744 1.54914 -4.39225  
H 4.93023 2.56185 -3.22754  
C 0.71923 -2.53986 -2.25600  
C 1.30645 -1.54898 -3.26490  
H 1.45104 -2.03087 -4.24660  
H 2.27400 -1.15597 -2.92583  
H 0.60746 -0.70550 -3.40091  
C -0.60019 -3.08965 -2.79294  
H -1.26580 -2.26321 -3.08956  
H -1.12198 -3.71574 -2.05601  
H -0.40765 -3.70185 -3.69148  
C 1.73639 -3.64723 -1.76936  
C 2.84369 -3.97658 -2.77714  
H 3.44517 -3.08997 -3.02619  
H 2.42159 -4.39293 -3.70824  
H 3.51793 -4.73147 -2.34178  
C 1.05731 -4.94472 -1.29309  
H 0.62269 -5.51401 -2.13197  
H 0.26546 -4.73848 -0.55488  
H 1.81513 -5.57543 -0.80189  
C -0.37602 -0.86951 2.90607  
C -1.90023 -0.81125 2.79138  
H -2.24597 0.22419 2.62952  
H -2.37059 -1.17054 3.72328  
H -2.28208 -1.42729 1.96252  
C 0.10443 0.12876 3.97487  
H 1.19142 0.04849 4.12432  
H -0.40125 -0.04188 4.94089  
H -0.12774 1.15469 3.64460  
C 0.20857 -2.32100 3.14062  
C 0.25527 -2.73479 4.62236  
H 0.66183 -3.75681 4.70278  
H -0.75003 -2.73021 5.08018  
H 0.91376 -2.06703 5.19770  
C -0.55993 -3.40135 2.34292  
H -0.67724 -3.10688 1.28621  
H -1.56111 -3.60756 2.76108  
H 0.02589 -4.33463 2.37468  
B 1.63895 -1.29504 1.51821  
B 1.53973 -2.08466 -0.04812

|   |         |          |         |
|---|---------|----------|---------|
| C | 2.92915 | -0.32134 | 1.71530 |
| H | 3.02134 | 0.42936  | 0.90451 |
| H | 2.79079 | 0.27020  | 2.64468 |
| C | 4.25417 | -1.10467 | 1.82956 |
| H | 4.15187 | -1.86253 | 2.63028 |
| H | 4.43212 | -1.68159 | 0.89849 |
| C | 5.48588 | -0.22655 | 2.11659 |
| H | 5.31879 | 0.33207  | 3.05884 |
| H | 5.57591 | 0.54480  | 1.32605 |
| C | 6.79762 | -1.02175 | 2.21680 |
| H | 7.66256 | -0.36830 | 2.42856 |
| H | 6.74423 | -1.77660 | 3.02190 |
| H | 7.00958 | -1.56239 | 1.27647 |

**A**

SCF (BP86) Energy = -2997.32343099  
 Enthalpy 0K = -2995.960224  
 Enthalpy 298K = -2995.875874  
 Free Energy 298K = -2996.080151  
 Lowest Frequency = 13.6199 cm<sup>-1</sup>  
 Second Frequency = 13.9911 cm<sup>-1</sup>  
 SCF (BP86-D3BJ) Energy = -2997.77532189  
 SCF (Toluene) Energy = -2997.33289136  
 SCF (BS2) Energy = -3532.13099936

|    |          |          |          |
|----|----------|----------|----------|
| Mg | 0.94572  | 0.06075  | -0.22484 |
| O  | -1.30795 | 2.59791  | -3.01397 |
| O  | 0.08827  | 1.17191  | -1.66353 |
| O  | -2.98650 | -0.26480 | -2.55906 |
| O  | -3.99223 | 1.39045  | -1.31779 |
| N  | 2.32678  | 0.89739  | 1.21606  |
| N  | 2.21519  | -1.60140 | -0.66827 |
| C  | 3.66605  | 0.29601  | 3.25617  |
| H  | 3.83105  | 1.37525  | 3.37263  |
| H  | 4.63966  | -0.21981 | 3.28325  |
| H  | 3.08892  | -0.06822 | 4.12424  |
| C  | 2.91138  | -0.04981 | 1.97363  |
| C  | 2.89837  | -1.44474 | 1.68506  |
| H  | 3.27038  | -2.06282 | 2.50693  |
| C  | 2.69828  | -2.14805 | 0.47554  |
| C  | 3.05401  | -3.63223 | 0.51549  |
| H  | 3.64059  | -3.94088 | -0.36250 |
| H  | 2.12608  | -4.23246 | 0.49688  |
| H  | 3.61294  | -3.89081 | 1.42705  |
| C  | 2.53080  | -2.29868 | -1.89529 |
| C  | 3.83878  | -2.14723 | -2.46211 |
| C  | 4.15053  | -2.82147 | -3.65787 |
| H  | 5.15399  | -2.71201 | -4.08354 |
| C  | 3.21239  | -3.62394 | -4.31516 |
| H  | 3.47400  | -4.13669 | -5.24687 |
| C  | 1.93784  | -3.76282 | -3.76182 |
| H  | 1.20115  | -4.39949 | -4.26452 |
| C  | 1.57658  | -3.12368 | -2.55759 |
| C  | 0.18366  | -3.40534 | -1.99547 |
| H  | 0.06118  | -2.80229 | -1.07721 |
| C  | 0.03522  | -4.89751 | -1.60998 |
| H  | 0.09529  | -5.54427 | -2.50335 |
| H  | -0.94184 | -5.07896 | -1.12960 |
| H  | 0.82798  | -5.22491 | -0.91618 |
| C  | -0.92297 | -3.00633 | -2.99543 |
| H  | -0.79505 | -3.52738 | -3.96042 |
| H  | -0.93405 | -1.92345 | -3.18878 |
| H  | -1.91835 | -3.27974 | -2.60788 |
| C  | 4.93138  | -1.29473 | -1.80819 |
| H  | 4.44926  | -0.67680 | -1.03107 |
| C  | 6.00445  | -2.16850 | -1.11439 |
| H  | 6.49621  | -2.83776 | -1.84307 |

|   |          |          |          |
|---|----------|----------|----------|
| H | 5.57573  | -2.79496 | -0.31655 |
| H | 6.78537  | -1.53349 | -0.65966 |
| C | 5.61725  | -0.34768 | -2.81867 |
| H | 6.18211  | -0.90580 | -3.58579 |
| H | 6.34113  | 0.30360  | -2.29869 |
| H | 4.88773  | 0.29327  | -3.33965 |
| C | 2.58723  | 2.28999  | 1.53078  |
| C | 3.64985  | 2.96942  | 0.85410  |
| C | 3.86941  | 4.33408  | 1.12340  |
| H | 4.67844  | 4.85549  | 0.60322  |
| C | 3.08055  | 5.03771  | 2.03871  |
| H | 3.26460  | 6.10044  | 2.22831  |
| C | 2.06053  | 4.36393  | 2.71268  |
| H | 1.44973  | 4.90593  | 3.44286  |
| C | 1.79594  | 2.99763  | 2.48575  |
| C | 4.59718  | 2.24492  | -0.10646 |
| H | 4.02864  | 1.41366  | -0.56317 |
| C | 5.79330  | 1.62646  | 0.65773  |
| H | 6.35637  | 2.41262  | 1.19179  |
| H | 6.48759  | 1.13056  | -0.04358 |
| H | 5.47037  | 0.87808  | 1.39680  |
| C | 5.13161  | 3.14454  | -1.24164 |
| H | 4.32297  | 3.69159  | -1.75112 |
| H | 5.65582  | 2.53026  | -1.99219 |
| H | 5.86120  | 3.88450  | -0.86724 |
| C | 0.70292  | 2.34202  | 3.33421  |
| H | 0.55871  | 1.31368  | 2.95579  |
| C | -0.64518 | 3.08783  | 3.23724  |
| H | -1.43070 | 2.53560  | 3.78152  |
| H | -0.96700 | 3.21026  | 2.19290  |
| H | -0.57797 | 4.09300  | 3.68968  |
| C | 1.12491  | 2.26795  | 4.82331  |
| H | 2.06013  | 1.70665  | 4.97342  |
| H | 0.33195  | 1.79373  | 5.43083  |
| H | 1.27822  | 3.28294  | 5.23025  |
| C | -5.08592 | 0.55750  | -1.81374 |
| C | -6.22793 | 1.48312  | -2.25398 |
| H | -7.05666 | 0.90751  | -2.70321 |
| H | -5.88195 | 2.23132  | -2.98219 |
| H | -6.62633 | 2.02242  | -1.37833 |
| C | -5.55832 | -0.33200 | -0.65038 |
| H | -5.84089 | 0.30784  | 0.20145  |
| H | -4.75935 | -1.01053 | -0.31068 |
| H | -6.43738 | -0.93827 | -0.93014 |
| C | -4.39142 | -0.24507 | -2.98087 |
| C | -4.43396 | 0.49694  | -4.33052 |
| H | -4.03599 | 1.51957  | -4.22761 |
| H | -5.45742 | 0.54688  | -4.73984 |
| H | -3.79800 | -0.03932 | -5.05348 |
| C | -4.88281 | -1.68364 | -3.16436 |
| H | -5.93899 | -1.69940 | -3.48652 |
| H | -4.79890 | -2.26528 | -2.23430 |
| H | -4.28366 | -2.18405 | -3.94325 |
| C | 0.86973  | 1.77315  | -2.75990 |
| C | 1.91210  | 0.76436  | -3.24264 |
| H | 2.69249  | 0.60017  | -2.47777 |
| H | 2.42123  | 1.14381  | -4.14606 |
| H | 1.46227  | -0.20980 | -3.48544 |
| C | 1.56010  | 3.04902  | -2.24492 |
| H | 0.82328  | 3.83821  | -2.03705 |
| H | 2.28694  | 3.43038  | -2.98319 |
| H | 2.10147  | 2.83610  | -1.30900 |
| C | -0.24106 | 2.11606  | -3.81882 |
| C | 0.16677  | 3.23677  | -4.79524 |
| H | -0.66435 | 3.42218  | -5.49608 |
| H | 1.05514  | 2.95699  | -5.38985 |
| H | 0.37307  | 4.17875  | -4.26557 |

|   |          |          |          |   |          |          |          |
|---|----------|----------|----------|---|----------|----------|----------|
| C | -0.67872 | 0.88266  | -4.64098 | O | 2.99497  | 1.31349  | -2.81231 |
| H | -1.00302 | 0.06285  | -3.98396 | O | 2.54464  | -0.32449 | -1.19746 |
| H | 0.12000  | 0.52219  | -5.31301 | O | -0.21290 | 1.47338  | -3.02374 |
| H | -1.54252 | 1.16902  | -5.26321 | O | 0.13676  | 3.01696  | -1.36459 |
| B | -1.34202 | 1.91675  | -1.67635 | N | 1.06653  | -0.02370 | 2.07132  |
| B | -2.76111 | 0.88430  | -1.77433 | N | 0.13704  | -2.38150 | 0.23086  |
| C | -1.42959 | 3.04891  | -0.49221 | C | 0.25849  | -0.41380 | 4.40386  |
| H | -1.74529 | 2.58611  | 0.46539  | H | 1.26832  | -0.25882 | 4.81345  |
| H | -0.42357 | 3.47545  | -0.29133 | H | -0.23303 | -1.21665 | 4.97330  |
| C | -2.39492 | 4.21183  | -0.81091 | H | -0.29685 | 0.52405  | 4.57782  |
| H | -2.09597 | 4.65838  | -1.77857 | C | 0.29474  | -0.74179 | 2.91197  |
| H | -3.41218 | 3.80598  | -0.97097 | C | -0.53300 | -1.83127 | 2.53144  |
| C | -2.45318 | 5.31437  | 0.26196  | H | -1.17528 | -2.20064 | 3.33355  |
| H | -1.43346 | 5.71321  | 0.43366  | C | -0.55043 | -2.63650 | 1.36980  |
| H | -2.76681 | 4.87178  | 1.22930  | C | -1.44025 | -3.87395 | 1.45432  |
| C | -3.40095 | 6.47018  | -0.09971 | H | -0.90499 | -4.79818 | 1.19141  |
| H | -3.42700 | 7.24765  | 0.68470  | H | -2.26823 | -3.77808 | 0.73083  |
| H | -3.09094 | 6.95632  | -1.04224 | H | -1.87649 | -3.98819 | 2.45723  |
| H | -4.43451 | 6.10697  | -0.24578 | C | 0.33936  | -3.52405 | -0.62660 |
| P | -1.30507 | -1.46185 | 2.03995  | C | 1.32660  | -4.50230 | -0.26912 |
| C | -2.50178 | -0.29869 | 2.80703  | C | 1.51250  | -5.62253 | -1.10148 |
| C | -2.94891 | -0.42843 | 4.14024  | H | 2.25919  | -6.37433 | -0.82153 |
| C | -3.07614 | 0.67058  | 1.96062  | C | 0.77434  | -5.79704 | -2.27740 |
| C | -3.94548 | 0.43160  | 4.62592  | H | 0.93927  | -6.67383 | -2.91276 |
| H | -2.52297 | -1.19108 | 4.79965  | C | -0.18036 | -4.83780 | -2.62433 |
| C | -4.07661 | 1.52226  | 2.45364  | H | -0.77095 | -4.97423 | -3.53768 |
| H | -2.75319 | 0.76462  | 0.91952  | C | -0.42369 | -3.70762 | -1.81673 |
| C | -4.50773 | 1.40789  | 3.78469  | C | -1.54328 | -2.75495 | -2.23896 |
| H | -4.28334 | 0.33746  | 5.66312  | H | -1.57792 | -1.92881 | -1.50564 |
| H | -4.50651 | 2.27220  | 1.78333  | C | -2.91786 | -3.46586 | -2.22208 |
| H | -5.28500 | 2.07659  | 4.16903  | H | -2.95468 | -4.27716 | -2.97084 |
| C | -2.32814 | -2.89204 | 1.49240  | H | -3.72426 | -2.75141 | -2.46562 |
| C | -2.72878 | -2.97419 | 0.14508  | H | -3.13528 | -3.91668 | -1.23923 |
| C | -2.79479 | -3.84133 | 2.42792  | C | -1.29029 | -2.15598 | -3.63943 |
| C | -3.56921 | -4.02483 | -0.26248 | H | -1.20819 | -2.94757 | -4.40509 |
| H | -2.39450 | -2.22126 | -0.57664 | H | -0.36475 | -1.56125 | -3.66759 |
| C | -3.63736 | -4.88181 | 2.01201  | H | -2.12286 | -1.49588 | -3.93530 |
| H | -2.49610 | -3.77548 | 3.47889  | C | 2.19207  | -4.39066 | 0.99360  |
| C | -4.02093 | -4.97756 | 0.66404  | H | 2.03542  | -3.38439 | 1.41672  |
| H | -3.86946 | -4.09690 | -1.31235 | C | 1.79020  | -5.42811 | 2.07029  |
| H | -3.99111 | -5.61855 | 2.74044  | H | 1.89555  | -6.45817 | 1.68455  |
| H | -4.67485 | -5.79246 | 0.33698  | H | 0.75042  | -5.29770 | 2.40744  |
| C | -0.19524 | -2.11859 | 3.35697  | H | 2.44233  | -5.33357 | 2.95651  |
| C | 0.31725  | -3.42969 | 3.24887  | C | 3.69865  | -4.54965 | 0.68454  |
| C | 0.19624  | -1.30735 | 4.44229  | H | 3.93356  | -5.55432 | 0.29103  |
| C | 1.19447  | -3.92579 | 4.22427  | H | 4.29242  | -4.41634 | 1.60566  |
| H | 0.02491  | -4.06482 | 2.40743  | H | 4.04958  | -3.81127 | -0.05446 |
| C | 1.07231  | -1.80968 | 5.41734  | C | 2.03685  | 0.84842  | 2.70258  |
| H | -0.18567 | -0.28677 | 4.53102  | C | 3.35174  | 0.34070  | 2.94967  |
| C | 1.56966  | -3.11881 | 5.31119  | C | 4.29063  | 1.15948  | 3.60547  |
| H | 1.58282  | -4.94537 | 4.13567  | H | 5.29311  | 0.76812  | 3.80457  |
| H | 1.36141  | -1.17609 | 6.26193  | C | 3.97105  | 2.45927  | 4.01345  |
| H | 2.24894  | -3.51031 | 6.07548  | H | 4.71407  | 3.07840  | 4.52739  |
| O | -0.57577 | -0.79602 | 0.82827  | C | 2.69333  | 2.95686  | 3.74865  |

#### TS (A-11)

SCF (BP86) Energy = -2997.29166573  
 Enthalpy 0K = -2995.928514  
 Enthalpy 298K = -2995.844527  
 Free Energy 298K = -2996.046934  
 Lowest Frequency = -127.5229 cm<sup>-1</sup>  
 Second Frequency = 13.2120 cm<sup>-1</sup>  
 SCF (BP86-D3BJ) Energy = -2997.74938088  
 SCF (Toluene) Energy = -2997.29873156  
 SCF (BS2) Energy = -3532.09684168077

Mg 0.57610 -0.26050 -0.05632



|   |          |          |          |
|---|----------|----------|----------|
| H | -0.31214 | 2.07152  | 2.39646  |
| C | 0.46849  | 4.02798  | 1.89121  |
| H | -0.49442 | 4.56373  | 1.82214  |
| H | 0.75477  | 3.71427  | 0.87638  |
| H | 1.21679  | 4.75232  | 2.25819  |
| C | -0.31023 | 3.30247  | 4.17988  |
| H | -0.35517 | 2.50592  | 4.94151  |
| H | -1.33940 | 3.65309  | 3.98928  |
| H | 0.25002  | 4.14500  | 4.62279  |
| C | -0.52441 | 3.76822  | -2.43823 |
| C | 0.23511  | 5.09141  | -2.61061 |
| H | -0.19922 | 5.69705  | -3.42558 |
| H | 1.30000  | 4.92239  | -2.82776 |
| H | 0.16654  | 5.67763  | -1.67924 |
| C | -1.96446 | 4.06353  | -1.98919 |
| H | -1.94076 | 4.64108  | -1.05099 |
| H | -2.53231 | 3.13744  | -1.80708 |
| H | -2.50668 | 4.66293  | -2.74078 |
| C | -0.43358 | 2.78046  | -3.67010 |
| C | 0.77402  | 3.04941  | -4.58564 |
| H | 1.72353  | 2.97683  | -4.03351 |
| H | 0.69784  | 4.03982  | -5.06603 |
| H | 0.79514  | 2.28904  | -5.38330 |
| C | -1.70140 | 2.69959  | -4.52816 |
| H | -1.87805 | 3.65499  | -5.05327 |
| H | -2.59593 | 2.46190  | -3.93534 |
| H | -1.57335 | 1.91584  | -5.29377 |
| C | 3.39062  | -0.96218 | -2.22848 |
| C | 2.87067  | -2.35627 | -2.56379 |
| H | 2.95152  | -3.02480 | -1.69575 |
| H | 3.47310  | -2.79193 | -3.38029 |
| H | 1.81851  | -2.34637 | -2.88012 |
| C | 4.80657  | -1.07032 | -1.63651 |
| H | 5.22553  | -0.08019 | -1.39935 |
| H | 5.49511  | -1.58771 | -2.32620 |
| H | 4.75789  | -1.65008 | -0.70141 |
| C | 3.29760  | 0.04928  | -3.44803 |
| C | 4.62264  | 0.22257  | -4.21005 |
| H | 4.48585  | 0.96658  | -5.01201 |
| H | 4.93794  | -0.72656 | -4.67798 |
| H | 5.43032  | 0.57805  | -3.55316 |
| C | 2.18171  | -0.28346 | -4.45342 |
| H | 1.19394  | -0.26376 | -3.97086 |
| H | 2.34416  | -1.26043 | -4.93793 |
| H | 2.17454  | 0.48703  | -5.24104 |
| B | 2.50975  | 1.11352  | -1.49825 |
| B | 0.31618  | 1.67515  | -1.73315 |
| C | 2.95929  | 2.25815  | -0.46418 |
| H | 2.53089  | 3.21184  | -0.82169 |
| H | 2.53716  | 2.10358  | 0.54337  |
| C | 4.49519  | 2.41988  | -0.35713 |
| H | 4.93064  | 1.54281  | 0.16174  |
| H | 4.93313  | 2.43235  | -1.37462 |
| C | 4.92964  | 3.69489  | 0.38931  |
| H | 4.48314  | 3.69140  | 1.40115  |
| H | 4.50707  | 4.57658  | -0.13194 |
| C | 6.45539  | 3.84382  | 0.49867  |
| H | 6.74000  | 4.77152  | 1.02574  |
| H | 6.89912  | 2.99700  | 1.05253  |
| H | 6.92884  | 3.86859  | -0.49967 |
| P | -3.21638 | 0.25229  | 0.52275  |
| C | -3.69981 | 1.80105  | 1.40786  |
| C | -4.89841 | 1.88965  | 2.14932  |
| C | -2.89969 | 2.94583  | 1.23076  |
| C | -5.29453 | 3.11612  | 2.70277  |
| H | -5.51697 | 1.00100  | 2.30852  |
| C | -3.30794 | 4.17208  | 1.78168  |

|   |          |          |          |
|---|----------|----------|----------|
| H | -1.96698 | 2.87131  | 0.66299  |
| C | -4.50208 | 4.26035  | 2.51471  |
| H | -6.22163 | 3.17649  | 3.28224  |
| H | -2.68905 | 5.06320  | 1.63620  |
| H | -4.81348 | 5.21918  | 2.94201  |
| C | -4.23902 | 0.26712  | -1.01786 |
| C | -3.58684 | 0.33681  | -2.26315 |
| C | -5.64986 | 0.25238  | -0.96179 |
| C | -4.34927 | 0.36345  | -3.44522 |
| H | -2.49261 | 0.38076  | -2.30488 |
| C | -6.40196 | 0.28394  | -2.14434 |
| H | -6.16472 | 0.21202  | 0.00336  |
| C | -5.75099 | 0.33317  | -3.38901 |
| H | -3.83983 | 0.41112  | -4.41261 |
| H | -7.49560 | 0.26852  | -2.09394 |
| H | -6.33756 | 0.35303  | -4.31342 |
| C | -3.92627 | -1.10426 | 1.56609  |
| C | -4.63897 | -2.17671 | 0.99070  |
| C | -3.75492 | -1.06002 | 2.96745  |
| C | -5.18495 | -3.18181 | 1.80623  |
| H | -4.77712 | -2.22400 | -0.09314 |
| C | -4.30422 | -2.06414 | 3.77833  |
| H | -3.20229 | -0.23354 | 3.42387  |
| C | -5.02180 | -3.12497 | 3.19897  |
| H | -5.74025 | -4.00753 | 1.34975  |
| H | -4.17396 | -2.01633 | 4.86437  |
| H | -5.45416 | -3.90511 | 3.83417  |
| O | -1.69907 | 0.19621  | 0.19016  |

#### A'

SCF (BP86) Energy = -2997.29640791  
 Enthalpy 0K = -2995.933628  
 Energy 298K = -2995.850452  
 Free Energy 298K = -2996.052370  
 Lowest Frequency = 8.9201 cm<sup>-1</sup>  
 Second Frequency = 19.1772 cm<sup>-1</sup>  
 SCF (BP86-D3BJ) Energy = -2997.75065538  
 SCF (Toluene) Energy = -2997.30767729  
 SCF (BS2) Energy = -3532.10506432

|    |          |          |          |
|----|----------|----------|----------|
| Mg | 0.92781  | 0.18294  | 0.03875  |
| O  | -0.76270 | 3.79037  | -1.64403 |
| O  | 0.32881  | 2.11030  | -0.49581 |
| O  | -3.37616 | 1.08062  | -0.94884 |
| O  | -3.48141 | 3.43514  | -0.68283 |
| N  | 1.94916  | -0.23504 | 1.89140  |
| N  | 2.51122  | -0.59386 | -1.14362 |
| C  | 3.14835  | -2.04540 | 3.15175  |
| H  | 3.02090  | -1.40334 | 4.03330  |
| H  | 4.21709  | -2.29180 | 3.03884  |
| H  | 2.61973  | -2.99833 | 3.32870  |
| C  | 2.61610  | -1.40383 | 1.87414  |
| C  | 2.89850  | -2.16074 | 0.70111  |
| H  | 3.27913  | -3.16479 | 0.90720  |
| C  | 2.94799  | -1.78446 | -0.65748 |
| C  | 3.51761  | -2.82699 | -1.61549 |
| H  | 4.23887  | -2.39358 | -2.32361 |
| H  | 2.69655  | -3.24654 | -2.22459 |
| H  | 3.99966  | -3.65446 | -1.07420 |
| C  | 3.07372  | -0.17675 | -2.40537 |
| C  | 4.41569  | 0.33247  | -2.43434 |
| C  | 4.96231  | 0.73873  | -3.66660 |
| H  | 5.98849  | 1.12110  | -3.69312 |
| C  | 4.22578  | 0.67181  | -4.85501 |
| H  | 4.66995  | 0.99710  | -5.80171 |
| C  | 2.91756  | 0.18283  | -4.81724 |
| H  | 2.34132  | 0.11693  | -5.74700 |

|   |          |          |          |   |          |          |          |
|---|----------|----------|----------|---|----------|----------|----------|
| C | 2.32474  | -0.25498 | -3.61461 | H | -5.05751 | -0.32278 | -2.57498 |
| C | 0.92224  | -0.85967 | -3.67989 | C | 1.24175  | 3.31738  | -0.50592 |
| H | 0.61376  | -1.11634 | -2.65002 | C | 2.68395  | 2.88620  | -0.71132 |
| C | 0.91817  | -2.16741 | -4.50844 | H | 3.03895  | 2.27249  | 0.13171  |
| H | 1.16201  | -1.96731 | -5.56697 | H | 3.32758  | 3.78241  | -0.75253 |
| H | -0.07881 | -2.63992 | -4.47707 | H | 2.82453  | 2.31833  | -1.64131 |
| H | 1.66021  | -2.89314 | -4.13399 | C | 1.05304  | 3.99818  | 0.85737  |
| C | -0.10883 | 0.13154  | -4.25901 | H | 0.01393  | 4.33578  | 0.99548  |
| H | 0.19548  | 0.49578  | -5.25573 | H | 1.71998  | 4.87147  | 0.95640  |
| H | -0.24834 | 1.00828  | -3.60644 | H | 1.29114  | 3.28962  | 1.66768  |
| H | -1.08879 | -0.35877 | -4.37191 | C | 0.64782  | 4.14329  | -1.69489 |
| C | 5.28402  | 0.44636  | -1.17403 | C | 0.75877  | 5.66469  | -1.52242 |
| H | 4.60803  | 0.36821  | -0.30451 | H | 0.30327  | 6.16246  | -2.39378 |
| C | 6.32104  | -0.69874 | -1.06689 | H | 1.81443  | 5.98348  | -1.46135 |
| H | 6.98093  | -0.71137 | -1.95288 | H | 0.22798  | 6.01050  | -0.62347 |
| H | 5.84626  | -1.68760 | -0.98216 | C | 1.19169  | 3.73547  | -3.07481 |
| H | 6.95772  | -0.55633 | -0.17574 | H | 1.19277  | 2.64292  | -3.21142 |
| C | 6.02959  | 1.79803  | -1.08483 | H | 2.21871  | 4.10506  | -3.23570 |
| H | 6.82870  | 1.87493  | -1.84317 | H | 0.54239  | 4.17563  | -3.84873 |
| H | 6.51499  | 1.89638  | -0.09799 | B | -0.99306 | 2.61538  | -0.95492 |
| H | 5.35378  | 2.65619  | -1.22351 | B | -2.62871 | 2.25363  | -0.34772 |
| C | 1.83700  | 0.49178  | 3.14227  | C | -2.39495 | 2.15411  | 1.29465  |
| C | 2.79614  | 1.50510  | 3.45836  | H | -1.93083 | 1.17340  | 1.53846  |
| C | 2.60574  | 2.28632  | 4.61535  | H | -1.62149 | 2.89946  | 1.58106  |
| H | 3.33427  | 3.06759  | 4.85551  | C | -3.62437 | 2.42756  | 2.18630  |
| C | 1.51720  | 2.07862  | 5.46834  | H | -4.21774 | 3.22401  | 1.70117  |
| H | 1.38037  | 2.70532  | 6.35572  | H | -4.28165 | 1.53453  | 2.22138  |
| C | 0.62274  | 1.04219  | 5.18906  | C | -3.30934 | 2.87564  | 3.62715  |
| H | -0.20661 | 0.84829  | 5.87773  | H | -2.69539 | 3.79715  | 3.58246  |
| C | 0.76431  | 0.22644  | 4.04831  | H | -2.67734 | 2.12228  | 4.13449  |
| C | 4.07794  | 1.69988  | 2.64344  | C | -4.56653 | 3.14171  | 4.47160  |
| H | 3.90914  | 1.25074  | 1.64817  | H | -4.31627 | 3.48828  | 5.49028  |
| C | 5.25964  | 0.93945  | 3.29541  | H | -5.20350 | 3.91309  | 4.00259  |
| H | 5.46234  | 1.33614  | 4.30615  | H | -5.18096 | 2.22830  | 4.57236  |
| H | 6.17805  | 1.05965  | 2.69361  | P | -1.30936 | -2.52161 | -0.05942 |
| H | 5.05551  | -0.13764 | 3.39343  | C | -2.01299 | -2.94664 | -1.70533 |
| C | 4.47516  | 3.17977  | 2.45348  | C | -2.50496 | -1.88434 | -2.49114 |
| H | 3.64178  | 3.78809  | 2.06924  | C | -2.21904 | -4.28366 | -2.11104 |
| H | 5.31518  | 3.25814  | 1.74217  | C | -3.15867 | -2.17112 | -3.70151 |
| H | 4.81319  | 3.63400  | 3.40137  | H | -2.42162 | -0.84851 | -2.13391 |
| C | -0.18348 | -0.96845 | 3.90021  | C | -2.86769 | -4.55544 | -3.32474 |
| H | 0.00392  | -1.42062 | 2.90999  | H | -1.88174 | -5.11385 | -1.48354 |
| C | -1.67437 | -0.58310 | 3.97506  | C | -3.33041 | -3.49872 | -4.12553 |
| H | -2.30816 | -1.47368 | 3.82459  | H | -3.54454 | -1.34692 | -4.30989 |
| H | -1.94292 | 0.16017  | 3.21069  | H | -3.01574 | -5.59349 | -3.63971 |
| H | -1.93086 | -0.16251 | 4.96327  | H | -3.83928 | -3.71031 | -5.07166 |
| C | 0.10872  | -2.02962 | 4.99234  | C | -0.18798 | -3.90024 | 0.44148  |
| H | 1.15399  | -2.37491 | 4.98440  | C | 0.01255  | -4.19844 | 1.80693  |
| H | -0.54865 | -2.90935 | 4.86482  | C | 0.54219  | -4.61398 | -0.53297 |
| H | -0.09644 | -1.61540 | 5.99514  | C | 0.89885  | -5.21817 | 2.18629  |
| C | -4.62965 | 3.03615  | -1.42293 | H | -0.52683 | -3.63936 | 2.57631  |
| C | -4.90646 | 4.09738  | -2.50785 | C | 1.42784  | -5.63268 | -0.14918 |
| H | -5.73925 | 3.80350  | -3.17329 | H | 0.41632  | -4.37813 | -1.59364 |
| H | -4.00952 | 4.28503  | -3.11716 | C | 1.60217  | -5.94180 | 1.20924  |
| H | -5.18256 | 5.04908  | -2.02191 | H | 1.03373  | -5.44972 | 3.24780  |
| C | -5.86196 | 2.96821  | -0.48747 | H | 1.98084  | -6.18560 | -0.91517 |
| H | -5.95926 | 3.93289  | 0.03877  | H | 2.28677  | -6.74291 | 1.50649  |
| H | -5.74055 | 2.17971  | 0.27191  | C | -2.78420 | -2.52809 | 1.03772  |
| H | -6.80065 | 2.78416  | -1.04180 | C | -3.62231 | -1.39080 | 1.00040  |
| C | -4.22940 | 1.60838  | -1.98105 | C | -3.17085 | -3.67442 | 1.76722  |
| C | -3.43571 | 1.73618  | -3.30217 | C | -4.82115 | -1.40428 | 1.73124  |
| H | -2.59764 | 2.44187  | -3.18721 | H | -3.38230 | -0.50976 | 0.38416  |
| H | -4.07162 | 2.08321  | -4.13545 | C | -4.36818 | -3.66617 | 2.49911  |
| H | -3.01852 | 0.75496  | -3.58275 | H | -2.55069 | -4.57532 | 1.76309  |
| C | -5.41166 | 0.64787  | -2.18697 | C | -5.19068 | -2.52800 | 2.48774  |
| H | -6.13618 | 1.05755  | -2.91351 | H | -5.46811 | -0.52225 | 1.69895  |
| H | -5.93952 | 0.45572  | -1.24021 | H | -4.65844 | -4.55308 | 3.07194  |

H -6.12597 -2.52346 3.05743  
O -0.59301 -1.12613 -0.08955

**TS (A' -11)**

SCF (BP86) Energy = -2997.28511710  
Enthalpy 0K = -2995.921705  
Energy 298K = -2995.839369  
Free Energy 298K = -2996.038387  
Lowest Frequency = -45.6116 cm<sup>-1</sup>  
Second Frequency = 13.5158 cm<sup>-1</sup>  
SCF (BP86-D3BJ) Energy = -2997.74665393  
SCF (Toluene) Energy = -2997.29201775  
SCF (BS2) Energy = -3532.09139033

Mg 0.58659 -0.21162 0.30726  
O 2.22612 2.36570 -1.94712  
O 2.41819 1.59468 0.21500  
O -1.26112 2.68181 -1.32895  
O 0.41425 4.10199 -0.47247  
N 0.37962 -1.04188 2.31511  
N 1.70962 -1.89605 -0.39828  
C -0.02253 -3.16273 3.61777  
H -0.08663 -2.52563 4.50858  
H 0.77305 -3.91029 3.77538  
H -0.96750 -3.72295 3.51257  
C 0.26155 -2.38213 2.33395  
C 0.42370 -3.23461 1.20477  
H 0.07987 -4.25796 1.37929  
C 1.15467 -3.06526 0.01110  
C 1.33648 -4.32739 -0.82932  
H 2.39915 -4.57289 -0.98157  
H 0.90656 -4.17829 -1.83399  
H 0.84057 -5.18987 -0.36034  
C 2.78693 -2.04361 -1.34866  
C 4.09792 -2.36736 -0.85903  
C 5.13328 -2.58429 -1.78906  
H 6.13446 -2.83470 -1.42444  
C 4.91457 -2.49061 -3.16920  
H 5.73475 -2.67039 -3.87257  
C 3.64179 -2.15539 -3.63550  
H 3.46826 -2.07141 -4.71435  
C 2.56645 -1.92528 -2.75211  
C 1.20859 -1.56271 -3.35642  
H 0.49481 -1.42462 -2.52431  
C 0.65923 -2.67847 -4.27720  
H 1.30520 -2.81986 -5.16207  
H -0.34826 -2.41143 -4.64109  
H 0.59332 -3.65374 -3.76457  
C 1.29249 -0.23723 -4.14637  
H 2.01556 -0.31894 -4.97789  
H 1.60330 0.60029 -3.50298  
H 0.31175 0.00861 -4.58607  
C 4.40503 -2.50331 0.64056  
H 3.71011 -1.82738 1.17228  
C 4.16304 -3.93608 1.18135  
H 4.73697 -4.67504 0.59340  
H 3.10075 -4.21870 1.16208  
H 4.50384 -4.00471 2.22983  
C 5.85390 -2.10314 1.00389  
H 6.57986 -2.87043 0.67997  
H 5.95329 -2.01686 2.09983  
H 6.15798 -1.14366 0.55742  
C 0.20155 -0.33632 3.56680  
C 1.34506 0.20710 4.22741  
C 1.16976 0.89631 5.44270  
H 2.04346 1.31297 5.95211  
C -0.09302 1.04595 6.02529

H -0.20612 1.58036 6.97436  
C -1.20611 0.50215 5.38095  
H -2.19744 0.61426 5.83447  
C -1.09279 -0.18485 4.15511  
C 2.75930 -0.03540 3.69742  
H 2.70544 -0.05523 2.59302  
C 3.27852 -1.41485 4.17033  
H 3.30715 -1.45833 5.27380  
H 4.30200 -1.59586 3.79661  
H 2.63791 -2.23619 3.81344  
C 3.76452 1.06089 4.10098  
H 3.40761 2.06725 3.82544  
H 4.73317 0.88793 3.60184  
H 3.96761 1.05633 5.18668  
C -2.38003 -0.74440 3.53972  
H -2.10497 -1.27738 2.61312  
C -3.37243 0.37966 3.16691  
H -4.27990 -0.03974 2.69767  
H -2.92945 1.09963 2.46345  
H -3.69135 0.93727 4.06524  
C -3.09025 -1.74352 4.48617  
H -2.43201 -2.56573 4.80659  
H -3.97483 -2.18360 3.99037  
H -3.45376 -1.23465 5.39611  
C -0.25289 4.85144 -1.50879  
C 0.80588 5.53302 -2.39476  
H 0.33854 6.11366 -3.21016  
H 1.49482 4.79627 -2.82992  
H 1.39465 6.23545 -1.77960  
C -1.08469 5.95545 -0.81813  
H -0.41529 6.55555 -0.17904  
H -1.87288 5.53341 -0.17649  
H -1.55502 6.63267 -1.55305  
C -1.15008 3.77084 -2.26892  
C -0.49189 3.26690 -3.57204  
H 0.51004 2.85462 -3.38476  
H -0.40872 4.07234 -4.32265  
H -1.12289 2.47564 -4.00915  
C -2.57575 4.24881 -2.60001  
H -2.56374 5.10416 -3.29839  
H -3.12617 4.54599 -1.69425  
H -3.13384 3.42754 -3.08155  
C 3.72843 2.24027 -0.09074  
C 4.85877 1.34014 0.39312  
H 4.80649 1.22227 1.48642  
H 5.83936 1.78506 0.14766  
H 4.80015 0.34604 -0.07086  
C 3.70358 3.56740 0.68577  
H 2.83366 4.17619 0.38912  
H 4.62971 4.14589 0.52732  
H 3.61666 3.35024 1.76291  
C 3.66560 2.42028 -1.66005  
C 4.19822 3.77239 -2.15546  
H 4.08386 3.83233 -3.25062  
H 5.27273 3.87795 -1.92333  
H 3.65551 4.61655 -1.70734  
C 4.33916 1.28972 -2.45092  
H 3.97959 0.29750 -2.14244  
H 5.43632 1.31823 -2.33760  
H 4.10518 1.41557 -3.52054  
B 1.51859 1.94857 -0.81938  
B -0.15666 2.73868 -0.35940  
C -0.54259 2.41145 1.19934  
H -1.07395 1.43768 1.30526  
H 0.39824 2.31681 1.77986  
C -1.39119 3.52650 1.86097  
H -1.00982 4.49216 1.48520

|   |          |          |          |   |          |          |          |
|---|----------|----------|----------|---|----------|----------|----------|
| H | -2.44249 | 3.45653  | 1.51341  | H | -1.52372 | -1.57797 | -5.26162 |
| C | -1.36259 | 3.57855  | 3.39793  | C | 0.98691  | -2.05329 | -2.40017 |
| H | -0.31059 | 3.67245  | 3.73045  | C | 2.27310  | -1.83972 | -2.98854 |
| H | -1.72048 | 2.62552  | 3.82379  | C | 3.23874  | -2.86354 | -2.91108 |
| C | -2.18774 | 4.74153  | 3.97268  | H | 4.22251  | -2.69924 | -3.36676 |
| H | -2.13740 | 4.77498  | 5.07535  | C | 2.97102  | -4.07952 | -2.27189 |
| H | -1.82796 | 5.71465  | 3.59202  | H | 3.73405  | -4.86448 | -2.22780 |
| H | -3.25329 | 4.65443  | 3.69110  | C | 1.70846  | -4.28525 | -1.70128 |
| P | -2.60866 | -1.21652 | -0.93963 | H | 1.48799  | -5.24028 | -1.21258 |
| C | -2.81722 | -1.18557 | -2.76769 | C | 0.70487  | -3.29842 | -1.75479 |
| C | -2.25224 | -0.09249 | -3.45500 | C | -0.68207 | -3.60863 | -1.19263 |
| C | -3.64039 | -2.10543 | -3.45139 | H | -1.19314 | -2.64694 | -0.99453 |
| C | -2.49711 | 0.05922  | -4.82936 | C | -1.53627 | -4.36887 | -2.23495 |
| H | -1.64852 | 0.64051  | -2.90583 | H | -1.66287 | -3.78618 | -3.16193 |
| C | -3.86961 | -1.94946 | -4.82686 | H | -2.54141 | -4.58412 | -1.83013 |
| H | -4.10262 | -2.94088 | -2.91669 | H | -1.06515 | -5.33248 | -2.50125 |
| C | -3.29659 | -0.86861 | -5.51696 | C | -0.64738 | -4.38572 | 0.13810  |
| H | -2.06043 | 0.90907  | -5.36416 | H | -0.32370 | -5.43363 | 0.00107  |
| H | -4.49972 | -2.67084 | -5.35730 | H | -1.65581 | -4.40038 | 0.58292  |
| H | -3.47995 | -0.74511 | -6.58937 | H | 0.02988  | -3.91170 | 0.86713  |
| C | -2.80633 | -2.96527 | -0.39150 | C | 2.65984  | -0.52829 | -3.67717 |
| C | -3.37604 | -3.26885 | 0.86342  | H | 1.76984  | 0.12272  | -3.69673 |
| C | -2.29072 | -4.00972 | -1.18868 | C | 3.75726  | 0.21185  | -2.88061 |
| C | -3.44917 | -4.59973 | 1.30229  | H | 3.43084  | 0.42278  | -1.84962 |
| H | -3.76620 | -2.46754 | 1.49727  | H | 4.01123  | 1.16994  | -3.36834 |
| C | -2.36889 | -5.33909 | -0.74685 | H | 4.68270  | -0.38862 | -2.82292 |
| H | -1.82806 | -3.78480 | -2.15440 | C | 3.12275  | -0.74906 | -5.13605 |
| C | -2.95081 | -5.63636 | 0.49630  | H | 4.06466  | -1.32475 | -5.17800 |
| H | -3.89961 | -4.82504 | 2.27428  | H | 3.30656  | 0.21946  | -5.63345 |
| H | -1.97286 | -6.14281 | -1.37573 | H | 2.37305  | -1.30098 | -5.72685 |
| H | -3.01406 | -6.67482 | 0.83763  | C | -0.80534 | 3.12086  | -1.05434 |
| C | -4.05143 | -0.24030 | -0.34800 | C | 0.42702  | 3.83995  | -1.16558 |
| C | -3.89738 | 1.16132  | -0.27786 | C | 0.53171  | 5.11305  | -0.57122 |
| C | -5.31235 | -0.83070 | -0.11483 | H | 1.46580  | 5.67574  | -0.67484 |
| C | -5.00503 | 1.95518  | 0.06054  | C | -0.53341 | 5.67535  | 0.14483  |
| H | -2.93433 | 1.63783  | -0.51322 | H | -0.43805 | 6.67323  | 0.58756  |
| C | -6.40807 | -0.02437 | 0.22995  | C | -1.71918 | 4.94642  | 0.28743  |
| H | -5.44508 | -1.91343 | -0.20246 | H | -2.54926 | 5.37507  | 0.86092  |
| C | -6.25342 | 1.36864  | 0.32398  | C | -1.88140 | 3.67397  | -0.29668 |
| H | -4.88438 | 3.04175  | 0.11574  | C | -3.19840 | 2.92961  | -0.07675 |
| H | -7.38236 | -0.48613 | 0.42102  | H | -3.16995 | 1.99079  | -0.65484 |
| H | -7.10961 | 1.99651  | 0.59240  | C | -4.42360 | 3.74622  | -0.54759 |
| O | -1.25288 | -0.57293 | -0.51314 | H | -4.56885 | 4.65522  | 0.06371  |

## 11

SCF (BP86) Energy = -2428.22000193  
 Enthalpy 0K = -2427.155010  
 Enthalpy 298K = -2427.086613  
 Free Energy 298K = -2427.262358  
 Lowest Frequency = 11.1260 cm<sup>-1</sup>  
 Second Frequency = 12.3752 cm<sup>-1</sup>  
 SCF (BP86-D3BJ) Energy = -2428.56495539  
 SCF (Toluene) Energy = -2428.22597178  
 SCF (BS2) Energy = -2962.88917904

|   |          |          |          |   |          |          |          |
|---|----------|----------|----------|---|----------|----------|----------|
| B | -2.75717 | -0.86481 | 0.22020  | H | -5.34077 | 3.13832  | -0.46165 |
| C | -2.08628 | 2.92149  | -3.56019 | H | -4.32596 | 4.06863  | -1.59814 |
| H | -3.07429 | 3.09979  | -3.10001 | C | -3.36252 | 2.53983  | 1.40949  |
| H | -2.23506 | 2.76146  | -4.63839 | H | -2.54559 | 1.87608  | 1.73916  |
| H | -1.49928 | 3.84230  | -3.41360 | H | -4.31452 | 2.00181  | 1.55755  |
| C | -1.41323 | 1.71975  | -2.90663 | H | -3.36749 | 3.43100  | 2.06281  |
| C | -1.37814 | 0.53270  | -3.68521 | C | 1.61752  | 3.26274  | -1.93472 |
| H | -1.89969 | 0.60459  | -4.64397 | H | 1.46454  | 2.16955  | -1.98416 |
| C | -0.62206 | -0.65924 | -3.52124 | C | 1.66340  | 3.79294  | -3.38733 |
| C | -0.54037 | -1.54103 | -4.76428 | H | 0.75197  | 3.52693  | -3.94638 |
| H | -0.21920 | -2.56574 | -4.52605 | H | 2.52745  | 3.36928  | -3.92998 |
| H | 0.17382  | -1.12514 | -5.49650 | H | 1.76226  | 4.89350  | -3.40062 |
|   |          |          |          | C | 2.96603  | 3.52733  | -1.23142 |
|   |          |          |          | H | 3.23387  | 4.59905  | -1.23803 |
|   |          |          |          | H | 3.77718  | 2.98906  | -1.74967 |
|   |          |          |          | H | 2.95185  | 3.19059  | -0.18112 |
|   |          |          |          | C | -4.43745 | -1.98733 | 1.43055  |
|   |          |          |          | C | -5.05776 | -1.33335 | 0.13879  |
|   |          |          |          | C | -5.29741 | -2.33806 | -1.00387 |
|   |          |          |          | H | -5.53617 | -1.77998 | -1.92380 |
|   |          |          |          | H | -6.13574 | -3.02238 | -0.78550 |
|   |          |          |          | H | -4.39271 | -2.93617 | -1.19905 |
|   |          |          |          | C | -6.32533 | -0.50328 | 0.37287  |
|   |          |          |          | H | -6.15459 | 0.30962  | 1.09480  |

|    |          |          |          |   |          |          |          |
|----|----------|----------|----------|---|----------|----------|----------|
| H  | -7.15056 | -1.13535 | 0.74677  | C | 6.08878  | -2.39520 | 1.08625  |
| H  | -6.65070 | -0.04996 | -0.57817 | H | 6.06851  | -3.49339 | 0.97670  |
| C  | -4.78268 | -3.46695 | 1.63700  | H | 6.64886  | -2.14960 | 2.00085  |
| H  | -4.46000 | -4.08362 | 0.78481  | H | 6.63917  | -2.00951 | 0.21185  |
| H  | -5.86978 | -3.60446 | 1.77672  | C | 4.67109  | -1.83752 | 1.13456  |
| H  | -4.27859 | -3.84710 | 2.54182  | C | 4.27147  | -1.25589 | 2.37498  |
| C  | -4.72968 | -1.19960 | 2.72097  | H | 5.07377  | -1.17329 | 3.11369  |
| H  | -4.11337 | -1.60703 | 3.53982  | C | 2.97266  | -0.99064 | 2.88612  |
| H  | -5.78954 | -1.27623 | 3.01973  | C | 2.89338  | -0.71801 | 4.38542  |
| H  | -4.47178 | -0.13516 | 2.60325  | H | 2.20628  | 0.11814  | 4.59742  |
| C  | 1.06349  | -1.46707 | 3.04632  | H | 3.88847  | -0.48583 | 4.79641  |
| C  | -0.29108 | -1.85436 | 3.00666  | H | 2.50350  | -1.59246 | 4.93240  |
| H  | -1.00027 | -1.37609 | 2.32173  | C | 0.58142  | -1.06767 | 2.82111  |
| C  | -0.73279 | -2.89833 | 3.83434  | C | 0.17422  | -2.29682 | 3.43284  |
| H  | -1.78101 | -3.20695 | 3.78015  | C | -1.07749 | -2.36329 | 4.07378  |
| C  | 0.16112  | -3.54694 | 4.70137  | H | -1.38070 | -3.30443 | 4.54735  |
| H  | -0.19092 | -4.36100 | 5.34387  | C | -1.94257 | -1.26350 | 4.11458  |
| C  | 1.51268  | -3.16397 | 4.73435  | H | -2.90734 | -1.33131 | 4.62895  |
| H  | 2.21596  | -3.67894 | 5.39702  | C | -1.55430 | -0.07513 | 3.48799  |
| C  | 1.96930  | -2.12983 | 3.90308  | H | -2.22644 | 0.79028  | 3.51061  |
| H  | 3.02861  | -1.85201 | 3.90815  | C | -0.30752 | 0.04845  | 2.84362  |
| C  | 1.50374  | 1.45650  | 3.03028  | C | 0.04921  | 1.39793  | 2.22353  |
| C  | 1.77298  | 1.43077  | 4.41537  | H | 1.06297  | 1.31051  | 1.79302  |
| H  | 2.02711  | 0.48818  | 4.91139  | C | 0.09585  | 2.51151  | 3.29460  |
| C  | 1.68938  | 2.61490  | 5.16319  | H | -0.89626 | 2.66586  | 3.75503  |
| H  | 1.89557  | 2.59354  | 6.23833  | H | 0.40968  | 3.46946  | 2.84543  |
| C  | 1.32705  | 3.81949  | 4.53628  | H | 0.80597  | 2.26789  | 4.10268  |
| H  | 1.25500  | 4.74018  | 5.12488  | C | -0.92795 | 1.77545  | 1.08813  |
| C  | 1.04515  | 3.84190  | 3.16102  | H | -1.96581 | 1.84700  | 1.45857  |
| H  | 0.74513  | 4.76939  | 2.66407  | H | -0.90870 | 1.03307  | 0.27276  |
| C  | 1.13303  | 2.66314  | 2.40346  | H | -0.66296 | 2.75737  | 0.65873  |
| H  | 0.89794  | 2.68017  | 1.33469  | C | 1.00965  | -3.57757 | 3.35752  |
| C  | 3.39179  | -0.37517 | 1.62773  | H | 1.98363  | -3.32838 | 2.90403  |
| C  | 4.43210  | 0.30589  | 2.29171  | C | 1.27893  | -4.21077 | 4.74177  |
| H  | 4.19905  | 1.07346  | 3.03648  | H | 0.34520  | -4.55757 | 5.21910  |
| C  | 5.76934  | 0.00309  | 1.98783  | H | 1.76223  | -3.50481 | 5.43854  |
| H  | 6.57641  | 0.53541  | 2.50174  | H | 1.94047  | -5.08865 | 4.63855  |
| C  | 6.06843  | -0.97318 | 1.02396  | C | 0.31184  | -4.60315 | 2.43515  |
| H  | 7.11219  | -1.20625 | 0.78836  | H | -0.67206 | -4.89485 | 2.84433  |
| C  | 5.03093  | -1.64582 | 0.35596  | H | 0.92062  | -5.51970 | 2.33908  |
| H  | 5.25373  | -2.39934 | -0.40548 | H | 0.14896  | -4.18755 | 1.42795  |
| C  | 3.69243  | -1.35112 | 0.65232  | C | 4.32500  | -2.72216 | -1.06326 |
| H  | 2.88997  | -1.86952 | 0.11697  | C | 4.01083  | -4.11185 | -1.13033 |
| Mg | -0.73193 | -0.02742 | -0.63139 | C | 4.48348  | -4.86628 | -2.22205 |
| N  | -0.90817 | 1.82462  | -1.66097 | H | 4.25382  | -5.93723 | -2.26481 |
| N  | 0.01070  | -1.00628 | -2.38488 | C | 5.22494  | -4.28092 | -3.25313 |
| O  | -2.99316 | -1.87464 | 1.18016  | H | 5.58598  | -4.88666 | -4.09143 |
| O  | -3.98668 | -0.43733 | -0.31021 | C | 5.47756  | -2.90620 | -3.20992 |
| O  | 0.79325  | 0.09224  | 0.68931  | H | 6.02969  | -2.43328 | -4.03034 |
| P  | 1.61790  | -0.06219 | 1.99948  | C | 5.03751  | -2.10893 | -2.13522 |
|    |          |          |          | C | 3.14118  | -4.81086 | -0.08489 |
|    |          |          |          | H | 2.82713  | -4.04941 | 0.65011  |
|    |          |          |          | C | 3.91595  | -5.91306 | 0.67220  |
|    |          |          |          | H | 4.25207  | -6.71209 | -0.01269 |
|    |          |          |          | H | 3.27464  | -6.38195 | 1.43971  |
|    |          |          |          | H | 4.81005  | -5.51067 | 1.17896  |
|    |          |          |          | C | 1.86578  | -5.38474 | -0.74606 |
|    |          |          |          | H | 1.26325  | -4.58159 | -1.20238 |
|    |          |          |          | H | 1.24181  | -5.90531 | 0.00039  |
|    |          |          |          | H | 2.11833  | -6.11649 | -1.53403 |
|    |          |          |          | C | 5.29627  | -0.60428 | -2.18818 |
|    |          |          |          | H | 4.96507  | -0.16665 | -1.23109 |
|    |          |          |          | C | 4.44304  | 0.03276  | -3.30991 |
|    |          |          |          | H | 4.61633  | 1.12142  | -3.36223 |
|    |          |          |          | H | 3.36712  | -0.13798 | -3.13547 |
|    |          |          |          | H | 4.69821  | -0.39719 | -4.29506 |
|    |          |          |          | C | 6.79106  | -0.26329 | -2.37568 |

**B**

SCF (BP86) Energy = -3204.96294345  
 Enthalpy 0K = -3203.626884  
 Energy 298K = -3203.540637  
 Free Energy 298K = -3203.763105  
 Lowest Frequency = -2.8909 cm<sup>-1</sup>  
 Second Frequency = 3.4976 cm<sup>-1</sup>  
 SCF (BP86-D3BJ) Energy = -3205.40170247  
 SCF (Toluene) Energy = -3204.97429330  
 SCF (BS2) Energy = -4074.65841376

|    |          |          |          |
|----|----------|----------|----------|
| Mg | 2.13507  | -0.72108 | 0.04390  |
| O  | -0.02941 | -2.34524 | -1.80313 |
| O  | -0.28101 | -0.10370 | -2.24599 |
| N  | 3.87316  | -1.93940 | 0.05992  |
| N  | 1.84610  | -0.98400 | 2.14395  |

|   |           |          |          |
|---|-----------|----------|----------|
| H | 7.41406   | -0.71506 | -1.58430 |
| H | 6.94426   | 0.82910  | -2.34680 |
| H | 7.17467   | -0.62687 | -3.34576 |
| C | -1.08644  | -0.80119 | -3.26312 |
| C | -0.26104  | -0.77554 | -4.56377 |
| H | -0.81518  | -1.21655 | -5.41062 |
| H | 0.68884   | -1.32082 | -4.44145 |
| H | -0.02269  | 0.27092  | -4.81641 |
| C | -2.40371  | -0.04360 | -3.46138 |
| H | -2.19896  | 0.95195  | -3.89255 |
| H | -2.96218  | 0.10145  | -2.52436 |
| H | -3.05343  | -0.58100 | -4.17604 |
| C | -1.22975  | -2.24124 | -2.64650 |
| C | -1.20774  | -3.38909 | -3.66211 |
| H | -0.27582  | -3.39780 | -4.24717 |
| H | -2.06174  | -3.31632 | -4.35910 |
| H | -1.28472  | -4.35351 | -3.13296 |
| C | -2.44307  | -2.38480 | -1.71135 |
| H | -3.39436  | -2.39773 | -2.27030 |
| H | -2.48091  | -1.56044 | -0.98240 |
| H | -2.35529  | -3.33178 | -1.15430 |
| B | 0.43105   | -1.05710 | -1.49192 |
| P | -6.39838  | 0.52663  | -0.47099 |
| C | -7.71666  | 0.23549  | -1.73888 |
| C | -7.28084  | -0.12016 | -3.03135 |
| C | -9.09542  | 0.36452  | -1.47528 |
| C | -8.21889  | -0.36545 | -4.04562 |
| H | -6.20571  | -0.18134 | -3.22848 |
| C | -10.03045 | 0.11515  | -2.49302 |
| H | -9.43928  | 0.67919  | -0.48407 |
| C | -9.59329  | -0.25324 | -3.77616 |
| H | -7.87673  | -0.63955 | -5.04919 |
| H | -11.10092 | 0.21853  | -2.28585 |
| H | -10.32441 | -0.44321 | -4.56914 |
| C | -6.29188  | -1.02382 | 0.53085  |
| C | -5.06502  | -1.27986 | 1.17787  |
| C | -7.35713  | -1.93807 | 0.66026  |
| C | -4.91024  | -2.43517 | 1.95882  |
| H | -4.23242  | -0.58061 | 1.05186  |
| C | -7.19846  | -3.09130 | 1.44616  |
| H | -8.30084  | -1.76207 | 0.13306  |
| C | -5.97793  | -3.33858 | 2.09587  |
| H | -3.95229  | -2.62435 | 2.45413  |
| H | -8.02620  | -3.80227 | 1.54135  |
| H | -5.85561  | -4.24231 | 2.70246  |
| C | -7.07450  | 1.81722  | 0.67144  |
| C | -6.67175  | 3.14799  | 0.44011  |
| C | -7.94585  | 1.52342  | 1.73969  |
| C | -7.15493  | 4.17910  | 1.25997  |
| H | -5.96641  | 3.35414  | -0.37152 |
| C | -8.42961  | 2.55958  | 2.55503  |
| H | -8.22877  | 0.48583  | 1.94822  |
| C | -8.03761  | 3.88667  | 2.31353  |
| H | -6.83787  | 5.21186  | 1.08021  |
| H | -9.10416  | 2.32846  | 3.38632  |
| H | -8.41225  | 4.69234  | 2.95386  |
| O | -5.05914  | 0.93835  | -1.09933 |
| P | 3.32830   | 2.69102  | -0.15605 |
| C | 4.99326   | 3.13769  | -0.83175 |
| C | 5.14552   | 3.52099  | -2.18151 |
| C | 6.12893   | 3.07983  | 0.00456  |
| C | 6.41569   | 3.84565  | -2.68381 |
| H | 4.27164   | 3.57489  | -2.83727 |
| C | 7.39657   | 3.39775  | -0.50422 |
| H | 6.02172   | 2.79780  | 1.05646  |
| C | 7.54145   | 3.78535  | -1.84690 |
| H | 6.52325   | 4.14546  | -3.73120 |

|   |          |         |          |
|---|----------|---------|----------|
| H | 8.27137  | 3.35032 | 0.15222  |
| H | 8.53088  | 4.04138 | -2.23971 |
| C | 2.10560  | 3.58464 | -1.19511 |
| C | 1.01440  | 2.85035 | -1.69936 |
| C | 2.23992  | 4.95819 | -1.50480 |
| C | 0.04790  | 3.49715 | -2.48696 |
| H | 0.91582  | 1.77743 | -1.50426 |
| C | 1.26609  | 5.59492 | -2.28783 |
| H | 3.11193  | 5.52412 | -1.16003 |
| C | 0.16645  | 4.86536 | -2.77401 |
| H | -0.79500 | 2.91300 | -2.86760 |
| H | 1.37125  | 6.65856 | -2.52569 |
| H | -0.59171 | 5.36555 | -3.38585 |
| C | 3.33498  | 3.38331 | 1.55522  |
| C | 3.79531  | 2.53705 | 2.58714  |
| C | 2.97140  | 4.71373 | 1.84622  |
| C | 3.91038  | 3.03464 | 3.89532  |
| H | 4.04414  | 1.49144 | 2.36747  |
| C | 3.08241  | 5.19915 | 3.15838  |
| H | 2.58504  | 5.36738 | 1.05884  |
| C | 3.55923  | 4.36385 | 4.18172  |
| H | 4.26769  | 2.37593 | 4.69327  |
| H | 2.79061  | 6.23068 | 3.38099  |
| H | 3.64702  | 4.74622 | 5.20399  |
| O | 3.05999  | 1.15906 | -0.11978 |

#### TS (B-C)

SCF (BP86) Energy = -3204.91745163  
 Enthalpy 0K = -3203.583095  
 Energy 298K = -3203.497501  
 Free Energy 298K = -3203.709877  
 Lowest Frequency = -219.2312 cm<sup>-1</sup>  
 Second Frequency = 9.3553 cm<sup>-1</sup>  
 SCF (BP86-D3BJ) Energy = -3205.39778279  
 SCF (Toluene) Energy = -3204.92639750  
 SCF (BS2) Energy = -4074.60758034

|    |          |          |          |
|----|----------|----------|----------|
| Mg | 0.53503  | 0.39440  | 0.34295  |
| O  | -1.24771 | -2.15904 | 1.78049  |
| O  | -0.63008 | -2.75239 | -0.38865 |
| N  | 0.91887  | 1.76381  | 1.97804  |
| N  | 0.57473  | 2.06253  | -1.06485 |
| C  | 2.54445  | 3.43422  | 2.85925  |
| H  | 1.80821  | 3.93294  | 3.51079  |
| H  | 3.24511  | 4.19285  | 2.47982  |
| H  | 3.09730  | 2.73213  | 3.50652  |
| C  | 1.85359  | 2.69648  | 1.71627  |
| C  | 2.26581  | 3.06577  | 0.40759  |
| H  | 3.12091  | 3.74626  | 0.37550  |
| C  | 1.62675  | 2.88254  | -0.84569 |
| C  | 2.20046  | 3.72522  | -1.98254 |
| H  | 2.01758  | 3.25902  | -2.96249 |
| H  | 3.28541  | 3.85195  | -1.84119 |
| H  | 1.75238  | 4.73285  | -2.00963 |
| C  | -0.22019 | 2.35004  | -2.22715 |
| C  | -0.99172 | 3.55772  | -2.28527 |
| C  | -1.74141 | 3.84086  | -3.44206 |
| H  | -2.32218 | 4.76957  | -3.48092 |
| C  | -1.77009 | 2.96762  | -4.53486 |
| H  | -2.34978 | 3.21347  | -5.43162 |
| C  | -1.04266 | 1.77613  | -4.46240 |
| H  | -1.05414 | 1.08606  | -5.31402 |
| C  | -0.26470 | 1.44975  | -3.33300 |
| C  | 0.54651  | 0.15717  | -3.37873 |
| H  | 1.06836  | 0.05229  | -2.41030 |
| C  | 1.62637  | 0.21717  | -4.48422 |
| H  | 1.16893  | 0.31714  | -5.48471 |

|   |          |          |          |   |          |          |          |
|---|----------|----------|----------|---|----------|----------|----------|
| H | 2.23191  | -0.70647 | -4.48424 | C | -5.83828 | -2.02197 | 1.21386  |
| H | 2.30274  | 1.07711  | -4.34027 | C | -4.71406 | -1.16354 | 3.64328  |
| C | -0.36904 | -1.07028 | -3.56889 | H | -3.08092 | -0.39097 | 2.43738  |
| H | -0.95866 | -0.99122 | -4.49946 | C | -6.48091 | -2.31121 | 2.42734  |
| H | -1.06320 | -1.17402 | -2.72101 | H | -6.27544 | -2.36657 | 0.27155  |
| H | 0.22791  | -1.99522 | -3.63512 | C | -5.92515 | -1.87627 | 3.64243  |
| C | -1.09787 | 4.53975  | -1.11409 | H | -4.26563 | -0.83640 | 4.58681  |
| H | -0.37808 | 4.23444  | -0.33680 | H | -7.41876 | -2.87684 | 2.42227  |
| C | -0.77557 | 5.99898  | -1.51157 | H | -6.43032 | -2.10149 | 4.58768  |
| H | -1.52602 | 6.40391  | -2.21380 | C | -4.55199 | 0.73223  | -0.85738 |
| H | 0.21156  | 6.09480  | -1.99404 | C | -4.33082 | 1.21966  | -2.16923 |
| H | -0.78040 | 6.64769  | -0.61818 | C | -5.38528 | 1.46623  | 0.02034  |
| C | -2.51405 | 4.47110  | -0.50069 | C | -4.96254 | 2.39275  | -2.59905 |
| H | -3.27776 | 4.77905  | -1.23565 | H | -3.66424 | 0.68316  | -2.85163 |
| H | -2.59497 | 5.14428  | 0.37128  | C | -6.00475 | 2.64578  | -0.41734 |
| H | -2.76357 | 3.44795  | -0.17771 | H | -5.56348 | 1.10214  | 1.03602  |
| C | 0.46618  | 1.64760  | 3.34157  | C | -5.80736 | 3.10658  | -1.72990 |
| C | -0.66677 | 2.39912  | 3.77775  | H | -4.78104 | 2.75494  | -3.61537 |
| C | -1.07690 | 2.30153  | 5.12212  | H | -6.65594 | 3.19852  | 0.26822  |
| H | -1.93523 | 2.89344  | 5.45986  | H | -6.30282 | 4.02118  | -2.07207 |
| C | -0.41213 | 1.47496  | 6.03384  | C | -4.28075 | -2.02923 | -1.66988 |
| H | -0.74353 | 1.41752  | 7.07644  | C | -3.36434 | -3.01587 | -2.09261 |
| C | 0.67512  | 0.71532  | 5.59161  | C | -5.55216 | -1.94347 | -2.28434 |
| H | 1.18960  | 0.05042  | 6.29503  | C | -3.73386 | -3.92396 | -3.09883 |
| C | 1.12955  | 0.78238  | 4.26012  | H | -2.36276 | -3.04653 | -1.64088 |
| C | -1.43857 | 3.33071  | 2.84196  | C | -5.90949 | -2.85476 | -3.28926 |
| H | -1.09130 | 3.12647  | 1.81398  | H | -6.25504 | -1.15823 | -1.98824 |
| C | -1.14413 | 4.81549  | 3.16125  | C | -5.00292 | -3.84968 | -3.69462 |
| H | -1.43288 | 5.06031  | 4.19933  | H | -3.01829 | -4.68638 | -3.42468 |
| H | -1.71208 | 5.48252  | 2.48860  | H | -6.89644 | -2.78448 | -3.75902 |
| H | -0.07384 | 5.05368  | 3.04505  | H | -5.28312 | -4.55674 | -4.48277 |
| C | -2.95924 | 3.06567  | 2.89425  | O | -2.12020 | -0.68386 | -0.14137 |
| H | -3.19007 | 2.01086  | 2.67222  | P | 3.91296  | -0.64926 | -0.59740 |
| H | -3.48666 | 3.69172  | 2.15546  | C | 5.07801  | -1.33312 | 0.66255  |
| H | -3.38253 | 3.30022  | 3.88719  | C | 4.58347  | -2.34428 | 1.51438  |
| C | 2.28712  | -0.12244 | 3.84087  | C | 6.43743  | -0.96330 | 0.74072  |
| H | 2.54643  | 0.11856  | 2.79491  | C | 5.43419  | -2.96448 | 2.44034  |
| C | 1.81659  | -1.59252 | 3.88188  | H | 3.53289  | -2.64146 | 1.44750  |
| H | 2.62359  | -2.27325 | 3.55924  | C | 7.28342  | -1.58513 | 1.67330  |
| H | 0.93960  | -1.73591 | 3.22893  | H | 6.83719  | -0.18922 | 0.07943  |
| H | 1.52471  | -1.88397 | 4.90696  | C | 6.78486  | -2.58418 | 2.52418  |
| C | 3.55255  | 0.06807  | 4.70624  | H | 5.04044  | -3.74674 | 3.09737  |
| H | 3.90412  | 1.11443  | 4.70325  | H | 8.33545  | -1.28686 | 1.73196  |
| H | 4.37256  | -0.56725 | 4.32840  | H | 7.44734  | -3.06867 | 3.24892  |
| H | 3.37140  | -0.21510 | 5.75851  | C | 3.83532  | -1.97508 | -1.87631 |
| C | -0.41626 | -3.92109 | 0.44694  | C | 2.59641  | -2.58561 | -2.14869 |
| C | 1.08428  | -4.01155 | 0.79427  | C | 5.00767  | -2.43456 | -2.51515 |
| H | 1.30796  | -4.89544 | 1.41667  | C | 2.53638  | -3.64599 | -3.07066 |
| H | 1.40191  | -3.10382 | 1.33125  | H | 1.69054  | -2.25150 | -1.62973 |
| H | 1.67345  | -4.09055 | -0.13305 | C | 4.93580  | -3.48503 | -3.44077 |
| C | -0.82018 | -5.18075 | -0.33411 | H | 5.97635  | -1.97780 | -2.28546 |
| H | -0.18100 | -5.28522 | -1.22785 | C | 3.69825  | -4.09138 | -3.71954 |
| H | -1.86905 | -5.14670 | -0.66466 | H | 1.57274  | -4.12312 | -3.27601 |
| H | -0.68184 | -6.08636 | 0.28340  | H | 5.84601  | -3.83561 | -3.93822 |
| C | -1.29971 | -3.61286 | 1.71422  | H | 3.64350  | -4.91629 | -4.43772 |
| C | -0.76452 | -4.18698 | 3.03554  | C | 4.78498  | 0.79056  | -1.34586 |
| H | 0.24790  | -3.82694 | 3.26508  | C | 5.25549  | 1.81954  | -0.49711 |
| H | -0.74685 | -5.29153 | 3.00624  | C | 4.97225  | 0.90288  | -2.74001 |
| H | -1.42677 | -3.88210 | 3.86324  | C | 5.93320  | 2.92231  | -1.03700 |
| C | -2.75923 | -4.08255 | 1.55238  | H | 5.09294  | 1.75492  | 0.58251  |
| H | -2.83323 | -5.18371 | 1.60770  | C | 5.64108  | 2.01536  | -3.27497 |
| H | -3.19480 | -3.75989 | 0.59421  | H | 4.60091  | 0.11988  | -3.40677 |
| H | -3.37152 | -3.65825 | 2.36332  | C | 6.12939  | 3.02137  | -2.42599 |
| B | -0.92425 | -1.60693 | 0.48257  | H | 6.30532  | 3.70827  | -0.37182 |
| P | -3.76534 | -0.84230 | -0.35098 | H | 5.78278  | 2.09209  | -4.35775 |
| C | -4.62305 | -1.30517 | 1.21239  | H | 6.65839  | 3.88390  | -2.84443 |
| C | -4.05551 | -0.88609 | 2.43538  | O | 2.49735  | -0.37250 | -0.00362 |

## C

SCF (BP86) Energy = -3205.07974721  
 Enthalpy 0K = -3203.742409  
 Energy 298K = -3203.655586  
 Free Energy 298K = -3203.880885  
 Lowest Frequency = 3.1023 cm<sup>-1</sup>  
 Second Frequency = 6.7670 cm<sup>-1</sup>  
 SCF (BP86-D3BJ) Energy = -3205.52051569  
 SCF (Toluene) Energy = -3205.08979613  
 SCF (BS2) Energy = -4074.76690958

|    |          |          |          |
|----|----------|----------|----------|
| Mg | -1.91703 | 0.69641  | 0.36113  |
| O  | 0.58129  | 2.52341  | -1.88532 |
| O  | 1.27199  | 0.39465  | -2.53658 |
| N  | -3.39285 | 2.17413  | 0.37470  |
| N  | -1.58585 | 0.80426  | 2.42670  |
| C  | -5.57083 | 2.82881  | 1.37525  |
| H  | -5.40921 | 3.91920  | 1.32316  |
| H  | -6.17918 | 2.61001  | 2.26516  |
| H  | -6.14379 | 2.56007  | 0.47179  |
| C  | -4.23796 | 2.09269  | 1.41861  |
| C  | -3.96373 | 1.36498  | 2.61466  |
| H  | -4.80049 | 1.31948  | 3.31692  |
| C  | -2.73074 | 0.89091  | 3.13798  |
| C  | -2.73935 | 0.48467  | 4.60734  |
| H  | -2.17550 | -0.45115 | 4.75849  |
| H  | -3.76914 | 0.35472  | 4.97451  |
| H  | -2.25262 | 1.24826  | 5.23667  |
| C  | -0.34228 | 0.66815  | 3.14019  |
| C  | 0.21206  | 1.79080  | 3.83200  |
| C  | 1.44778  | 1.64582  | 4.49066  |
| H  | 1.87108  | 2.50771  | 5.01922  |
| C  | 2.15200  | 0.43715  | 4.47445  |
| H  | 3.11006  | 0.34551  | 4.99758  |
| C  | 1.61470  | -0.65126 | 3.78083  |
| H  | 2.16195  | -1.60034 | 3.75803  |
| C  | 0.37533  | -0.56318 | 3.11695  |
| C  | -0.15470 | -1.80272 | 2.40145  |
| H  | -1.17436 | -1.56939 | 2.04572  |
| C  | -0.26332 | -3.01349 | 3.35475  |
| H  | 0.73074  | -3.33531 | 3.71237  |
| H  | -0.72427 | -3.87217 | 2.83722  |
| H  | -0.87749 | -2.77994 | 4.24099  |
| C  | 0.71569  | -2.14778 | 1.17259  |
| H  | 1.75631  | -2.36401 | 1.47055  |
| H  | 0.73276  | -1.31426 | 0.45073  |
| H  | 0.32426  | -3.04274 | 0.65706  |
| C  | -0.44493 | 3.17341  | 3.83438  |
| H  | -1.41964 | 3.09288  | 3.32411  |
| C  | -0.69798 | 3.71721  | 5.25926  |
| H  | 0.24869  | 3.88369  | 5.80310  |
| H  | -1.31018 | 3.02922  | 5.86691  |
| H  | -1.22601 | 4.68572  | 5.21213  |
| C  | 0.42264  | 4.17221  | 3.03506  |
| H  | 1.41522  | 4.29715  | 3.50309  |
| H  | -0.05878 | 5.16554  | 2.99938  |
| H  | 0.58033  | 3.82576  | 2.00112  |
| C  | -3.70427 | 3.09972  | -0.68830 |
| C  | -3.21765 | 4.43825  | -0.62487 |
| C  | -3.57058 | 5.33985  | -1.64809 |
| H  | -3.21054 | 6.37340  | -1.59090 |
| C  | -4.35499 | 4.94448  | -2.73615 |
| H  | -4.62081 | 5.66266  | -3.51937 |
| C  | -4.77275 | 3.61276  | -2.82338 |
| H  | -5.35753 | 3.28660  | -3.69116 |
| C  | -4.45885 | 2.67505  | -1.82021 |

|   |          |          |          |
|---|----------|----------|----------|
| C | -2.28900 | 4.92386  | 0.48830  |
| H | -2.06906 | 4.05887  | 1.13827  |
| C | -2.94702 | 6.01830  | 1.35865  |
| H | -3.19424 | 6.91294  | 0.75953  |
| H | -2.26326 | 6.33714  | 2.16537  |
| H | -3.88022 | 5.66263  | 1.82835  |
| C | -0.95086 | 5.42059  | -0.10807 |
| H | -0.44972 | 4.61869  | -0.67588 |
| H | -0.27171 | 5.75927  | 0.69268  |
| H | -1.10943 | 6.27536  | -0.78954 |
| C | -4.88901 | 1.22223  | -2.01510 |
| H | -4.65027 | 0.66772  | -1.09160 |
| C | -4.06880 | 0.58881  | -3.16363 |
| H | -4.36696 | -0.46153 | -3.32350 |
| H | -2.98851 | 0.61197  | -2.94220 |
| H | -4.22970 | 1.13288  | -4.11139 |
| C | -6.40382 | 1.07452  | -2.27738 |
| H | -7.00309 | 1.53011  | -1.47009 |
| H | -6.68050 | 0.00840  | -2.34611 |
| H | -6.70429 | 1.55686  | -3.22460 |
| C | 1.83673  | 1.33150  | -3.49696 |
| C | 0.93013  | 1.30695  | -4.74378 |
| H | 1.32553  | 1.94232  | -5.55457 |
| H | -0.08852 | 1.64920  | -4.49708 |
| H | 0.86256  | 0.27220  | -5.11897 |
| C | 3.25236  | 0.87909  | -3.86814 |
| H | 3.21292  | -0.09916 | -4.37687 |
| H | 3.89399  | 0.77596  | -2.98010 |
| H | 3.72725  | 1.59808  | -4.55828 |
| C | 1.75945  | 2.70618  | -2.71552 |
| C | 1.55105  | 3.93974  | -3.60229 |
| H | 0.61343  | 3.87229  | -4.17446 |
| H | 2.39023  | 4.06506  | -4.30892 |
| H | 1.49952  | 4.84467  | -2.97417 |
| C | 2.95837  | 2.92624  | -1.77391 |
| H | 3.88291  | 3.15527  | -2.33118 |
| H | 3.14335  | 2.03959  | -1.14524 |
| H | 2.73613  | 3.77656  | -1.10844 |
| B | 0.39614  | 1.13641  | -1.69542 |
| P | 5.71769  | -0.03942 | -0.11374 |
| C | 6.96566  | 0.22158  | -1.48713 |
| C | 7.42488  | 1.54495  | -1.68134 |
| C | 7.42297  | -0.78819 | -2.35919 |
| C | 8.33548  | 1.84577  | -2.70466 |
| H | 7.06410  | 2.34452  | -1.02348 |
| C | 8.32499  | -0.48286 | -3.39290 |
| H | 7.07105  | -1.81647 | -2.22939 |
| C | 8.78652  | 0.83126  | -3.56639 |
| H | 8.68570  | 2.87538  | -2.83602 |
| H | 8.66901  | -1.27822 | -4.06339 |
| H | 9.48979  | 1.06633  | -4.37242 |
| C | 6.84032  | -0.15206 | 1.38278  |
| C | 6.22547  | -0.00809 | 2.64686  |
| C | 8.23791  | -0.33703 | 1.32224  |
| C | 6.98853  | -0.06987 | 3.82287  |
| H | 5.14323  | 0.15776  | 2.70758  |
| C | 9.00117  | -0.38874 | 2.50069  |
| H | 8.72942  | -0.43428 | 0.34871  |
| C | 8.37898  | -0.25873 | 3.75269  |
| H | 6.49832  | 0.04115  | 4.79622  |
| H | 10.08579 | -0.53117 | 2.43872  |
| H | 8.97585  | -0.29713 | 4.67025  |
| C | 5.23645  | -1.83322 | -0.35434 |
| C | 4.00100  | -2.08352 | -0.99214 |
| C | 6.01654  | -2.92612 | 0.08173  |
| C | 3.56687  | -3.40272 | -1.20499 |
| H | 3.36821  | -1.24788 | -1.31458 |



C 5.57740 -4.24299 -0.12859  
 H 6.96609 -2.74294 0.59565  
 C 4.35312 -4.48353 -0.77446  
 H 2.60305 -3.58161 -1.69311  
 H 6.19128 -5.08239 0.21664  
 H 4.00870 -5.51140 -0.93256  
 O -0.48568 0.57977 -0.86608  
 P -3.33298 -2.46821 -0.35972  
 C -5.01708 -2.68745 -1.09530  
 C -5.19238 -2.90257 -2.47853  
 C -6.14984 -2.61320 -0.25574  
 C -6.48369 -3.04562 -3.01167  
 H -4.32231 -2.96485 -3.13824  
 C -7.43713 -2.74781 -0.79464  
 H -6.02663 -2.46013 0.82083  
 C -7.60600 -2.96845 -2.17217  
 H -6.60965 -3.21551 -4.08576  
 H -8.30941 -2.68787 -0.13593  
 H -8.61181 -3.08153 -2.58966  
 C -2.13570 -3.16532 -1.56311  
 C -1.05161 -2.35000 -1.94620  
 C -2.29522 -4.45180 -2.13081  
 C -0.12557 -2.82828 -2.88960  
 H -0.91821 -1.33849 -1.53183  
 C -1.35663 -4.92266 -3.06046  
 H -3.15952 -5.07394 -1.87453  
 C -0.27189 -4.11092 -3.44023  
 H 0.69787 -2.16774 -3.18061  
 H -1.48059 -5.91842 -3.49870  
 H 0.45087 -4.47955 -4.17617  
 C -3.38799 -3.46594 1.19128  
 C -3.79874 -2.79682 2.36502  
 C -3.12080 -4.84902 1.22712  
 C -3.96437 -3.51945 3.55709  
 H -3.96820 -1.71409 2.34136  
 C -3.28139 -5.56172 2.42577  
 H -2.77207 -5.36967 0.33059  
 C -3.71210 -4.90072 3.58772  
 H -4.28288 -2.99831 4.46553  
 H -3.06500 -6.63461 2.45137  
 H -3.83911 -5.46043 4.52008  
 O -3.02945 -0.98274 -0.00176

## 12

SCF (BP86) Energy = -2503.58652475  
 Enthalpy 0K = -2502.515935  
 Enthalpy 298K = -2502.446716  
 Free Energy 298K = -2502.625057  
 Lowest Frequency = 8.4027 cm<sup>-1</sup>  
 Second Frequency = 13.0097 cm<sup>-1</sup>  
 SCF (BP86-D3BJ) Energy = -2503.93245599  
 SCF (Toluene) Energy = -2503.59346698  
 SCF (BS2) Energy = -3038.28081376

B -3.24900 -0.34401 0.55714  
 C -0.95883 -1.49745 -4.66561  
 H -1.75961 -1.13598 -5.32833  
 H -1.19470 -2.52284 -4.33961  
 H -0.03157 -1.55638 -5.26296  
 C -0.77751 -0.56281 -3.47717  
 C -1.25500 0.76292 -3.65156  
 H -1.81385 0.92547 -4.57658  
 C -1.01432 1.93866 -2.89471  
 C -1.52204 3.23938 -3.50435  
 H -1.80482 3.10625 -4.55898  
 H -0.77252 4.04333 -3.43305  
 H -2.41195 3.59003 -2.95153

C -0.00717 3.22004 -1.12860  
 C 1.28995 3.74504 -1.42504  
 C 1.66582 4.98362 -0.86751  
 H 2.64749 5.40359 -1.11381  
 C 0.81039 5.68973 -0.01162  
 H 1.11644 6.65669 0.40300  
 C -0.43832 5.14538 0.30864  
 H -1.10330 5.68685 0.99116  
 C -0.87129 3.91925 -0.23409  
 C -2.24510 3.37909 0.16636  
 H -2.42381 2.45088 -0.40290  
 C -2.27603 3.00847 1.66712  
 H -1.49779 2.26810 1.90976  
 H -3.24647 2.55894 1.93859  
 H -2.11907 3.89909 2.30207  
 C -3.37969 4.37451 -0.16676  
 H -3.29220 5.30291 0.42560  
 H -4.36242 3.92738 0.06218  
 H -3.37682 4.66099 -1.23230  
 C 2.26661 3.00542 -2.34433  
 H 1.90592 1.96459 -2.42612  
 C 3.70072 2.96826 -1.77241  
 H 4.15402 3.97443 -1.72702  
 H 4.35111 2.34930 -2.41364  
 H 3.72466 2.54217 -0.75552  
 C 2.28194 3.61061 -3.76800  
 H 1.28913 3.56282 -4.24330  
 H 2.99163 3.06501 -4.41506  
 H 2.59453 4.67010 -3.74187  
 C 0.50160 -2.27504 -2.37561  
 C 1.79627 -2.39645 -2.96814  
 C 2.46261 -3.63558 -2.90211  
 H 3.45553 -3.73026 -3.35701  
 C 1.88415 -4.74566 -2.27349  
 H 2.41356 -5.70440 -2.24270  
 C 0.61559 -4.61850 -1.69561  
 H 0.15415 -5.48700 -1.21208  
 C -0.09447 -3.40138 -1.73218  
 C -1.49438 -3.34136 -1.11874  
 H -1.83591 -2.29251 -1.14301  
 C -2.50133 -4.17729 -1.94276  
 H -2.55147 -3.83778 -2.99102  
 H -3.51471 -4.09099 -1.51335  
 H -2.22470 -5.24711 -1.94869  
 C -1.49564 -3.79342 0.35706  
 H -1.20307 -4.85363 0.46231  
 H -2.50325 -3.68273 0.79230  
 H -0.80611 -3.18704 0.96579  
 C 2.50171 -1.21294 -3.63435  
 H 1.77596 -0.38572 -3.70977  
 C 3.67579 -0.71811 -2.75984  
 H 3.32487 -0.40264 -1.76366  
 H 4.18264 0.13945 -3.23669  
 H 4.42705 -1.51484 -2.61550  
 C 2.99318 -1.54160 -5.06203  
 H 3.78999 -2.30645 -5.05459  
 H 3.41004 -0.63888 -5.54178  
 H 2.17733 -1.92094 -5.70066  
 C 0.80804 -1.33577 3.09898  
 C -0.59119 -1.16338 3.05751  
 H -1.06679 -0.55280 2.27508  
 C -1.39414 -1.84024 3.98964  
 H -2.47884 -1.70698 3.93105  
 C -0.81037 -2.67427 4.95677  
 H -1.44138 -3.19848 5.68269  
 C 0.58394 -2.85256 4.98758  
 H 1.03857 -3.51739 5.72950

|    |          |          |          |   |          |          |          |
|----|----------|----------|----------|---|----------|----------|----------|
| C  | 1.39833  | -2.18935 | 4.05694  | N | 0.40108  | 2.04054  | -1.09514 |
| H  | 2.48204  | -2.34834 | 4.06639  | N | -2.26708 | 0.45999  | -1.09207 |
| C  | 3.38825  | -1.32724 | 1.65978  | C | 0.32569  | 3.81422  | -2.86964 |
| C  | 3.33311  | -2.38263 | 0.72353  | H | 1.14792  | 4.28793  | -2.31723 |
| H  | 2.41175  | -2.58529 | 0.16798  | H | -0.48264 | 4.55107  | -3.00746 |
| C  | 4.47427  | -3.16332 | 0.48977  | H | 0.69269  | 3.54904  | -3.87644 |
| H  | 4.42335  | -3.97475 | -0.24254 | C | -0.21582 | 2.57123  | -2.16726 |
| C  | 5.66747  | -2.89718 | 1.18266  | C | -1.42115 | 2.07954  | -2.73280 |
| H  | 6.55650  | -3.50883 | 0.99628  | H | -1.72253 | 2.59590  | -3.64947 |
| C  | 5.72469  | -1.84224 | 2.10764  | C | -2.41213 | 1.22666  | -2.19949 |
| H  | 6.65687  | -1.62591 | 2.63962  | C | -3.75034 | 1.28793  | -2.93397 |
| C  | 4.58789  | -1.05339 | 2.34711  | H | -4.37103 | 0.39762  | -2.76376 |
| H  | 4.63826  | -0.22096 | 3.05617  | H | -3.57905 | 1.40715  | -4.01601 |
| C  | 2.28196  | 1.20046  | 2.80270  | H | -4.33162 | 2.16544  | -2.60066 |
| C  | 2.59279  | 1.21836  | 4.17936  | C | -3.47500 | -0.06272 | -0.50421 |
| H  | 2.54892  | 0.29586  | 4.76793  | C | -4.32669 | 0.80629  | 0.24519  |
| C  | 2.92995  | 2.42982  | 4.80119  | C | -5.46640 | 0.26454  | 0.87191  |
| H  | 3.16972  | 2.44324  | 5.86942  | H | -6.11634 | 0.92369  | 1.45875  |
| C  | 2.94008  | 3.62337  | 4.05900  | C | -5.78759 | -1.09107 | 0.75595  |
| H  | 3.19324  | 4.56871  | 4.55037  | H | -6.67999 | -1.49293 | 1.24764  |
| C  | 2.60987  | 3.60810  | 2.69457  | C | -4.96278 | -1.93010 | -0.00364 |
| H  | 2.58805  | 4.53425  | 2.11256  | H | -5.22608 | -2.98720 | -0.10229 |
| C  | 2.28267  | 2.39846  | 2.06177  | C | -3.80272 | -1.44740 | -0.64264 |
| H  | 2.00553  | 2.38925  | 1.00337  | C | -2.94506 | -2.39413 | -1.48870 |
| C  | -5.50554 | -0.39690 | 0.03525  | H | -1.88308 | -2.13119 | -1.32924 |
| C  | -5.28367 | -0.90734 | 1.52129  | C | -3.22192 | -2.23590 | -3.00368 |
| C  | -6.21474 | -0.28105 | 2.56740  | H | -4.28815 | -2.41616 | -3.23100 |
| H  | -6.10239 | 0.81304  | 2.60356  | H | -2.62766 | -2.97025 | -3.57611 |
| H  | -5.97250 | -0.67880 | 3.56748  | H | -2.95376 | -1.23431 | -3.37070 |
| H  | -7.27127 | -0.52058 | 2.35443  | C | -3.10303 | -3.87806 | -1.10248 |
| C  | -5.33160 | -2.44364 | 1.63298  | H | -4.08632 | -4.28184 | -1.40493 |
| H  | -6.35451 | -2.83752 | 1.50577  | H | -2.98422 | -4.04187 | -0.01899 |
| H  | -4.96799 | -2.74431 | 2.62963  | H | -2.33368 | -4.47535 | -1.61873 |
| H  | -4.68098 | -2.91203 | 0.87612  | C | -4.05439 | 2.30795  | 0.40050  |
| C  | -5.98374 | 1.06718  | -0.02643 | H | -3.21965 | 2.57716  | -0.26812 |
| H  | -7.02757 | 1.17889  | 0.31383  | C | -5.27742 | 3.16417  | -0.00505 |
| H  | -5.91793 | 1.41938  | -1.06886 | H | -6.11824 | 3.03080  | 0.69826  |
| H  | -5.34251 | 1.71561  | 0.59357  | H | -5.64672 | 2.90555  | -1.01142 |
| C  | -6.42329 | -1.27702 | -0.82293 | H | -5.01337 | 4.23605  | -0.00115 |
| H  | -6.03422 | -2.30273 | -0.90994 | C | -3.62280 | 2.66805  | 1.84035  |
| H  | -6.49449 | -0.85587 | -1.83970 | H | -4.39440 | 2.37453  | 2.57439  |
| H  | -7.44263 | -1.32055 | -0.40066 | H | -3.46496 | 3.75696  | 1.93746  |
| Mg | -0.40468 | 0.15345  | -0.64154 | H | -2.68108 | 2.16620  | 2.11727  |
| N  | -0.16237 | -1.00281 | -2.36174 | C | 1.57933  | 2.69550  | -0.57684 |
| N  | -0.39487 | 1.95718  | -1.69475 | C | 1.45759  | 3.47895  | 0.61051  |
| O  | 1.16034  | -0.05850 | 0.57210  | C | 2.61085  | 4.06784  | 1.16171  |
| O  | -1.93794 | -0.14819 | 0.43971  | H | 2.52093  | 4.67359  | 2.06948  |
| O  | -4.16658 | -0.43942 | -0.51695 | C | 3.86740  | 3.90189  | 0.56853  |
| O  | -3.92290 | -0.48999 | 1.79998  | H | 4.75471  | 4.36534  | 1.01246  |
| P  | 1.84694  | -0.36368 | 1.93994  | C | 3.97589  | 3.14663  | -0.60329 |
|    |          |          |          | H | 4.95695  | 3.02744  | -1.07662 |
|    |          |          |          | C | 2.85429  | 2.53595  | -1.20105 |
|    |          |          |          | C | 0.09395  | 3.75460  | 1.24569  |
|    |          |          |          | H | -0.59870 | 2.96647  | 0.89804  |
|    |          |          |          | C | -0.46972 | 5.10674  | 0.74645  |
|    |          |          |          | H | 0.19523  | 5.93783  | 1.04196  |
|    |          |          |          | H | -1.46802 | 5.30009  | 1.17807  |
|    |          |          |          | H | -0.56275 | 5.12584  | -0.35182 |
|    |          |          |          | C | 0.11883  | 3.71768  | 2.78684  |
|    |          |          |          | H | 0.56163  | 2.77918  | 3.15844  |
|    |          |          |          | H | -0.90728 | 3.79976  | 3.18573  |
|    |          |          |          | H | 0.69651  | 4.55720  | 3.21214  |
|    |          |          |          | C | 3.06698  | 1.75701  | -2.50329 |
|    |          |          |          | H | 2.08998  | 1.35280  | -2.82136 |
|    |          |          |          | C | 4.03051  | 0.56450  | -2.31088 |
|    |          |          |          | H | 4.16378  | 0.02919  | -3.26852 |
|    |          |          |          | H | 3.65126  | -0.15505 | -1.56995 |

**TS (9-D)**  
SCF (BP86) Energy = -2220.55559966  
Enthalpy 0K = -2219.464203  
Enthalpy 298K = -2219.398983  
Free Energy 298K = -2219.561574  
Lowest Frequency = -135.2496 cm<sup>-1</sup>  
Second Frequency = 16.4369 cm<sup>-1</sup>  
SCF (BP86-D3BJ) Energy = -2220.87424985  
SCF (Toluene) Energy = -2220.56037645  
SCF (BS2) Energy = -2420.33788036

|    |          |          |          |
|----|----------|----------|----------|
| Mg | -0.32142 | 0.19964  | -0.27727 |
| O  | 1.10101  | -2.09990 | 2.39477  |
| O  | -0.20968 | -0.24940 | 1.79385  |
| O  | 2.44987  | -1.96098 | -0.81597 |
| O  | 0.34966  | -2.86043 | -1.02158 |

|   |          |          |          |    |          |                   |
|---|----------|----------|----------|----|----------|-------------------|
| H | 5.02868  | 0.91067  | -1.98817 |    |          |                   |
| C | 3.60356  | 2.67210  | -3.63188 | Mg | 0.32233  | 0.05980 -0.40496  |
| H | 2.96905  | 3.55753  | -3.79589 | O  | -1.54899 | 0.56611 3.62572   |
| H | 3.66456  | 2.11233  | -4.58186 | O  | -0.21797 | -0.19885 1.88484  |
| H | 4.62069  | 3.03263  | -3.39677 | O  | -1.76725 | 2.66086 -0.04460  |
| C | 1.23944  | -3.76249 | -1.77344 | O  | -0.17843 | 3.10699 -1.64336  |
| C | 1.03885  | -3.43631 | -3.26414 | N  | -0.36795 | -1.63443 -1.53458 |
| H | 1.61899  | -4.11466 | -3.91295 | N  | 2.35332  | -0.25679 -1.04354 |
| H | 1.33350  | -2.39800 | -3.48653 | C  | -0.34979 | -2.82155 -3.73955 |
| H | -0.02837 | -3.54818 | -3.51634 | H  | -1.03052 | -3.55462 -3.28318 |
| C | 0.82715  | -5.20968 | -1.48806 | H  | 0.44476  | -3.35743 -4.28160 |
| H | -0.18063 | -5.40135 | -1.89234 | H  | -0.92913 | -2.25113 -4.48686 |
| H | 0.80782  | -5.42004 | -0.40859 | C  | 0.25270  | -1.87364 -2.70552 |
| H | 1.52311  | -5.91761 | -1.97177 | C  | 1.48795  | -1.29235 -3.09386 |
| C | 2.65928  | -3.35889 | -1.22779 | H  | 1.78374  | -1.52003 -4.12176 |
| C | 3.78699  | -3.39818 | -2.26416 | C  | 2.48870  | -0.64521 -2.33186 |
| H | 3.57714  | -2.74660 | -3.12525 | C  | 3.81868  | -0.44950 -3.05125 |
| H | 3.94351  | -4.42769 | -2.63168 | H  | 4.29780  | 0.49978 -2.76776  |
| H | 4.72783  | -3.05792 | -1.80155 | H  | 3.67413  | -0.46791 -4.14211 |
| C | 3.07303  | -4.13633 | 0.03461  | H  | 4.52946  | -1.25402 -2.79456 |
| H | 3.25872  | -5.20095 | -0.18814 | C  | 3.55762  | 0.08915 -0.33532  |
| H | 2.30505  | -4.05720 | 0.82023  | C  | 4.37852  | -0.94937 0.20865  |
| H | 4.00353  | -3.70367 | 0.43593  | C  | 5.50345  | -0.59631 0.97953  |
| C | -0.86999 | -0.89772 | 2.95694  | H  | 6.12838  | -1.39066 1.40437  |
| C | -2.38583 | -0.89613 | 2.79095  | C  | 5.84316  | 0.74198 1.20867   |
| H | -2.78399 | 0.12866  | 2.83219  | H  | 6.72314  | 0.99555 1.80956   |
| H | -2.84509 | -1.46243 | 3.62018  | C  | 5.05479  | 1.75125 0.64520   |
| H | -2.70854 | -1.35212 | 1.84429  | H  | 5.33344  | 2.80023 0.79898   |
| C | -0.47077 | -0.07349 | 4.19375  | C  | 3.91568  | 1.45582 -0.13062  |
| H | 0.61982  | -0.08205 | 4.35102  | C  | 3.13869  | 2.61096 -0.76673  |
| H | -0.95841 | -0.45773 | 5.10532  | H  | 2.25197  | 2.19550 -1.27428  |
| H | -0.79012 | 0.97093  | 4.04958  | C  | 3.99052  | 3.34293 -1.83128  |
| C | -0.22450 | -2.34043 | 2.94223  | H  | 4.87982  | 3.81780 -1.37902  |
| C | -0.04214 | -2.95270 | 4.33884  | H  | 3.39389  | 4.13387 -2.31765  |
| H | 0.42695  | -3.94562 | 4.24442  | H  | 4.34455  | 2.65655 -2.61857  |
| H | -1.01587 | -3.08370 | 4.84206  | C  | 2.63120  | 3.62507 0.27997   |
| H | 0.60553  | -2.33173 | 4.97529  | H  | 3.46009  | 4.08119 0.85022   |
| C | -0.95800 | -3.33682 | 2.03150  | H  | 1.94110  | 3.15145 0.99861   |
| H | -1.05989 | -2.95395 | 1.00573  | H  | 2.07690  | 4.43488 -0.22248  |
| H | -1.95494 | -3.58890 | 2.43022  | C  | 4.08310  | -2.43737 -0.01432 |
| H | -0.36728 | -4.26609 | 1.97770  | H  | 3.20605  | -2.51256 -0.67899 |
| B | 1.11696  | -0.89995 | 1.67268  | C  | 5.26464  | -3.16671 -0.69644 |
| B | 1.08933  | -1.75114 | -0.57522 | H  | 6.15421  | -3.19216 -0.04237 |
| C | 2.44500  | -0.01238 | 1.69895  | H  | 5.56399  | -2.67916 -1.63907 |
| H | 2.55932  | 0.62351  | 0.80403  | H  | 4.99178  | -4.21158 -0.92616 |
| H | 2.27248  | 0.70454  | 2.53394  | C  | 3.72923  | -3.15478 1.30770  |
| C | 3.76113  | -0.77000 | 1.96501  | H  | 4.56350  | -3.10349 2.02974  |
| H | 3.62270  | -1.46528 | 2.81516  | H  | 3.50892  | -4.22175 1.12610  |
| H | 3.98931  | -1.39839 | 1.08572  | H  | 2.84516  | -2.70352 1.78730  |
| C | 4.95397  | 0.15885  | 2.25356  | C  | -1.57772 | -2.34939 -1.22792 |
| H | 4.72648  | 0.78100  | 3.14204  | C  | -1.51389 | -3.42907 -0.29228 |
| H | 5.07291  | 0.86983  | 1.41350  | C  | -2.70289 | -4.09129 0.06577  |
| C | 6.27056  | -0.60000 | 2.48289  | H  | -2.66269 | -4.91956 0.77995  |
| H | 7.10897  | 0.08682  | 2.69321  | C  | -3.93813 | -3.71601 -0.47827 |
| H | 6.18747  | -1.29647 | 3.33678  | H  | -4.85269 | -4.24420 -0.18847 |
| H | 6.54495  | -1.19940 | 1.59621  | C  | -3.99035 | -2.66556 -1.39950 |
|   |          |          |          | H  | -4.95565 | -2.37588 -1.82984 |
|   |          |          |          | C  | -2.83081 | -1.96640 -1.79379 |
|   |          |          |          | C  | -0.16980 | -3.90044 0.26706  |
|   |          |          |          | H  | 0.47778  | -3.00702 0.35243  |
|   |          |          |          | C  | 0.52857  | -4.87259 -0.71463 |
|   |          |          |          | H  | -0.09759 | -5.76638 -0.88565 |
|   |          |          |          | H  | 1.49717  | -5.20994 -0.30431 |
|   |          |          |          | H  | 0.72195  | -4.39895 -1.68957 |
|   |          |          |          | C  | -0.27364 | -4.55480 1.65886  |
|   |          |          |          | H  | -0.83585 | -3.92631 2.36914  |
|   |          |          |          | H  | 0.73531  | -4.72587 2.07244  |

**D**

SCF (BP86) Energy = -2220.56913551  
 Enthalpy 0K = -2219.478107  
 Enthalpy 298K = -2219.411349  
 Free Energy 298K = -2219.580199  
 Lowest Frequency = 14.3165 cm<sup>-1</sup>  
 Second Frequency = 17.9582 cm<sup>-1</sup>  
 SCF (BP86-D3BJ) Energy = -2220.87954776  
 SCF (Toluene) Energy = -2220.57479419  
 SCF (BS2) Energy = -2420.35330441

|   |          |          |          |
|---|----------|----------|----------|
| H | -0.77018 | -5.54046 | 1.61308  |
| C | -2.97837 | -0.83620 | -2.81742 |
| H | -1.96867 | -0.46608 | -3.06582 |
| C | -3.77781 | 0.35525  | -2.24269 |
| H | -3.94372 | 1.11479  | -3.02794 |
| H | -3.24391 | 0.83697  | -1.40837 |
| H | -4.76917 | 0.03270  | -1.87849 |
| C | -3.64836 | -1.32987 | -4.12266 |
| H | -3.14349 | -2.21584 | -4.54149 |
| H | -3.63440 | -0.53211 | -4.88579 |
| H | -4.70503 | -1.60218 | -3.95262 |
| C | -1.16109 | 4.19277  | -1.76496 |
| C | -1.98416 | 3.89902  | -3.03245 |
| H | -2.71669 | 4.69764  | -3.24209 |
| H | -2.52087 | 2.94178  | -2.94286 |
| H | -1.29880 | 3.82354  | -3.89247 |
| C | -0.40857 | 5.51741  | -1.94068 |
| H | 0.18433  | 5.48446  | -2.86972 |
| H | 0.27942  | 5.71556  | -1.10512 |
| H | -1.11332 | 6.36423  | -2.01879 |
| C | -1.98709 | 4.06566  | -0.42654 |
| C | -3.49620 | 4.29605  | -0.56735 |
| H | -3.94911 | 3.60062  | -1.28953 |
| H | -3.70993 | 5.32928  | -0.89370 |
| H | -3.98762 | 4.14125  | 0.40760  |
| C | -1.43451 | 4.92599  | 0.72409  |
| H | -1.61223 | 6.00207  | 0.55463  |
| H | -0.35232 | 4.76561  | 0.85667  |
| H | -1.93932 | 4.63728  | 1.66052  |
| C | 0.64939  | -0.11222 | 3.10983  |
| C | 2.03852  | 0.38260  | 2.73542  |
| H | 2.57753  | -0.35472 | 2.12122  |
| H | 2.63426  | 0.54349  | 3.65047  |
| H | 2.00631  | 1.33159  | 2.18160  |
| C | 0.70773  | -1.53081 | 3.69303  |
| H | -0.28753 | -1.87316 | 4.02021  |
| H | 1.39527  | -1.57770 | 4.55364  |
| H | 1.07390  | -2.22814 | 2.92417  |
| C | -0.17281 | 0.88009  | 4.00654  |
| C | -0.02201 | 0.65371  | 5.51401  |
| H | -0.65144 | 1.37620  | 6.05835  |
| H | 1.02371  | 0.80811  | 5.83065  |
| H | -0.33501 | -0.35890 | 5.80884  |
| C | 0.06085  | 2.35883  | 3.65422  |
| H | -0.04922 | 2.53080  | 2.57070  |
| H | 1.05923  | 2.70124  | 3.97305  |
| H | -0.69546 | 2.96950  | 4.17320  |
| B | -1.53971 | 0.06512  | 2.34276  |
| B | -0.63196 | 2.16298  | -0.71059 |
| C | -2.86120 | -0.16500 | 1.53490  |
| H | -2.95811 | 0.71527  | 0.86573  |
| H | -2.77929 | -1.04130 | 0.86709  |
| C | -4.12365 | -0.27883 | 2.42161  |
| H | -4.04483 | -1.17512 | 3.06793  |
| H | -4.16773 | 0.58405  | 3.11268  |
| C | -5.43178 | -0.35692 | 1.61609  |
| H | -5.37440 | -1.21412 | 0.91835  |
| H | -5.51923 | 0.54644  | 0.98135  |
| C | -6.68031 | -0.48860 | 2.50198  |
| H | -7.60438 | -0.53879 | 1.90043  |
| H | -6.63608 | -1.40218 | 3.12180  |
| H | -6.77606 | 0.37084  | 3.18965  |

**E**  
SCF (BP86) Energy = -1651.45464809  
Enthalpy 0K = -1650.660452  
Energy 298K = -1650.611955

Free Energy 298K = -1650.745687  
Lowest Frequency = 12.0457 cm<sup>-1</sup>  
Second Frequency = 14.6873 cm<sup>-1</sup>  
SCF (BP86-D3BJ) Energy = -1651.66661971  
SCF (Toluene) Energy = -1651.46147315  
SCF (BS2) Energy = -1851.09994995

|    |          |          |          |
|----|----------|----------|----------|
| Mg | 0.00022  | -0.20716 | -0.00034 |
| O  | 0.07130  | 2.85693  | 1.14925  |
| O  | -0.07424 | 2.85648  | -1.15121 |
| N  | -1.50049 | -1.61801 | 0.01359  |
| N  | 1.50215  | -1.61678 | -0.01289 |
| C  | -2.47650 | -3.89532 | 0.02029  |
| H  | -3.10506 | -3.72554 | 0.91133  |
| H  | -2.15520 | -4.94693 | 0.01097  |
| H  | -3.12594 | -3.71571 | -0.85364 |
| C  | -1.28561 | -2.94966 | 0.01130  |
| C  | 0.00158  | -3.54358 | 0.00115  |
| H  | 0.00204  | -4.63614 | 0.00166  |
| C  | 1.28828  | -2.94860 | -0.00935 |
| C  | 2.47992  | -3.89334 | -0.01699 |
| H  | 3.10873  | -3.72396 | -0.90792 |
| H  | 2.15944  | -4.94520 | -0.00677 |
| H  | 3.12883  | -3.71235 | 0.85704  |
| C  | -2.84904 | -1.10895 | 0.02548  |
| C  | -3.48200 | -0.81666 | 1.26838  |
| C  | -2.78645 | -1.07402 | 2.60688  |
| H  | -1.86045 | -1.63768 | 2.39612  |
| C  | -2.38221 | 0.25927  | 3.28013  |
| H  | -1.73919 | 0.87314  | 2.62548  |
| H  | -1.83606 | 0.07183  | 4.22166  |
| H  | -3.27472 | 0.86278  | 3.52348  |
| C  | -3.64265 | -1.93136 | 3.56504  |
| H  | -3.08123 | -2.15192 | 4.48970  |
| H  | -3.93208 | -2.89178 | 3.10521  |
| H  | -4.57059 | -1.41026 | 3.85944  |
| C  | -4.76525 | -0.23688 | 1.25184  |
| H  | -5.25912 | -0.00675 | 2.20273  |
| C  | -5.41743 | 0.05630  | 0.04817  |
| H  | -6.41595 | 0.50617  | 0.05698  |
| C  | -4.77971 | -0.22163 | -1.16674 |
| H  | -5.28482 | 0.02034  | -2.10877 |
| C  | -3.49661 | -0.80066 | -1.20591 |
| C  | -2.81784 | -1.04194 | -2.55588 |
| H  | -1.88431 | -1.59935 | -2.36208 |
| C  | -3.68076 | -1.90072 | -3.50682 |
| H  | -4.61892 | -1.38689 | -3.78097 |
| H  | -3.95233 | -2.86787 | -3.05020 |
| H  | -3.13271 | -2.10780 | -4.44256 |
| C  | -2.43504 | 0.29920  | -3.22617 |
| H  | -1.89894 | 0.12160  | -4.17539 |
| H  | -1.79078 | 0.91713  | -2.57662 |
| H  | -3.33694 | 0.89396  | -3.45638 |
| C  | 2.85034  | -1.10676 | -0.02489 |
| C  | 3.49730  | -0.79656 | 1.20631  |
| C  | 2.81839  | -1.03688 | 2.55640  |
| H  | 1.88532  | -1.59519 | 2.36301  |
| C  | 2.43442  | 0.30468  | 3.22517  |
| H  | 1.89843  | 0.12772  | 4.17457  |
| H  | 1.78966  | 0.92133  | 2.57490  |
| H  | 3.33581  | 0.90046  | 3.45475  |
| C  | 3.68174  | -1.89405 | 3.50840  |
| H  | 4.61949  | -1.37926 | 3.78219  |
| H  | 3.95411  | -2.86147 | 3.05282  |
| H  | 3.13367  | -2.10057 | 4.44426  |
| C  | 4.77999  | -0.21659 | 1.16687  |
| H  | 5.28460  | 0.02684  | 2.10879  |

|   |          |          |          |   |          |          |          |
|---|----------|----------|----------|---|----------|----------|----------|
| C | 5.41788  | 0.06037  | -0.04814 | C | -3.89947 | 1.72162  | 2.69688  |
| H | 6.41606  | 0.51099  | -0.05721 | H | -2.86680 | 1.40500  | 2.92246  |
| C | 4.76629  | -0.23471 | -1.25169 | H | -4.58456 | 0.91275  | 3.00230  |
| H | 5.26030  | -0.00528 | -2.20269 | H | -4.12396 | 2.60424  | 3.32130  |
| C | 3.48349  | -0.81543 | -1.26797 | C | -5.52737 | 2.39847  | 0.85550  |
| C | 2.78847  | -1.07472 | -2.60634 | H | -6.20583 | 1.57486  | 1.13962  |
| H | 1.86315  | -1.63941 | -2.39532 | H | -5.65868 | 2.59049  | -0.22308 |
| C | 3.64596  | -1.93157 | -3.56378 | H | -5.85632 | 3.30238  | 1.39808  |
| H | 3.08498  | -2.15355 | -4.48837 | C | -3.22283 | 4.41026  | 1.37557  |
| H | 3.93667  | -2.89127 | -3.10325 | H | -4.01045 | 4.56337  | 2.12213  |
| H | 4.57322  | -1.40940 | -3.85845 | C | -2.37063 | 5.46851  | 1.04758  |
| C | 2.38253  | 0.25755  | -3.28061 | H | -2.48833 | 6.44626  | 1.52688  |
| H | 1.73856  | 0.87099  | -2.62649 | C | -1.35697 | 5.25634  | 0.10836  |
| H | 1.83681  | 0.06868  | -4.22210 | H | -0.67192 | 6.07568  | -0.13753 |
| H | 3.27426  | 0.86209  | -3.52421 | C | -1.18515 | 4.01190  | -0.52928 |
| B | -0.00097 | 2.06807  | -0.00087 | C | -0.00377 | 3.85296  | -1.48767 |
| C | 0.26139  | 4.26020  | 0.74192  | H | -0.05478 | 2.84442  | -1.93314 |
| C | -0.26622 | 4.25960  | -0.74433 | C | -0.01062 | 4.88528  | -2.63854 |
| C | -0.52143 | 5.15156  | 1.71172  | H | 0.11416  | 5.91490  | -2.25906 |
| H | -0.10486 | 5.04895  | 2.72740  | H | -0.94724 | 4.86069  | -3.22120 |
| H | -0.44598 | 6.21380  | 1.41952  | H | 0.82330  | 4.68252  | -3.33242 |
| H | -1.58518 | 4.87368  | 1.75176  | C | 1.32080  | 3.95832  | -0.69904 |
| C | 1.76932  | 4.54706  | 0.85856  | H | 2.18684  | 3.81065  | -1.36558 |
| H | 2.09565  | 4.33127  | 1.88888  | H | 1.36645  | 3.20210  | 0.09996  |
| H | 2.35024  | 3.90426  | 0.17764  | H | 1.42055  | 4.95118  | -0.22552 |
| H | 2.00397  | 5.60203  | 0.63531  | C | -2.43183 | -2.74158 | -0.52735 |
| C | 0.51539  | 5.15172  | -1.71441 | C | -3.75704 | -2.97411 | -0.04333 |
| H | 0.43852  | 6.21395  | -1.42254 | C | -4.80925 | -1.86657 | 0.05996  |
| H | 1.57951  | 4.87526  | -1.75438 | H | -4.37283 | -0.94090 | -0.35248 |
| H | 0.09894  | 5.04824  | -2.73006 | C | -5.16127 | -1.60561 | 1.54265  |
| C | -1.77455 | 4.54440  | -0.86109 | H | -5.88348 | -0.77503 | 1.63379  |
| H | -2.10054 | 4.32782  | -1.89135 | H | -4.26194 | -1.35015 | 2.12704  |
| H | -2.35463 | 3.90105  | -0.17998 | H | -5.61796 | -2.49760 | 2.00656  |
| H | -2.01062 | 5.59914  | -0.63821 | C | -6.09216 | -2.17963 | -0.74335 |

#### TS (11-F)

SCF (BP86) Energy = -2428.16496127  
 Enthalpy 0K = -2427.101889  
 Energy 298K = -2427.035036  
 Free Energy 298K = -2427.205962  
 Lowest Frequency = -543.8482 cm<sup>-1</sup>  
 Second Frequency = 14.1791 cm<sup>-1</sup>  
 SCF (BP86-D3BJ) Energy = -2428.51462255  
 SCF (Toluene) Energy = -2428.17292045  
 SCF (BS2) Energy = -2962.82939725

|    |          |          |          |   |          |          |          |
|----|----------|----------|----------|---|----------|----------|----------|
| Mg | -1.01004 | 0.01301  | 0.09097  | H | -5.88042 | -2.34512 | -1.81306 |
| O  | 0.48596  | -1.46153 | 2.66338  | H | -6.80760 | -1.34198 | -0.66802 |
| O  | 0.73732  | 0.83528  | 2.87157  | C | -4.10548 | -4.26193 | 0.40549  |
| N  | -1.95514 | 1.65049  | -0.84713 | H | -5.12275 | -4.43957 | 0.77314  |
| N  | -2.08040 | -1.42424 | -1.01222 | C | -3.18373 | -5.31384 | 0.39709  |
| C  | -3.16943 | 2.66582  | -2.76560 | H | -3.47535 | -6.31116 | 0.74343  |
| H  | -3.98242 | 3.07980  | -2.14420 | C | -1.88144 | -5.07009 | -0.04659 |
| H  | -3.59075 | 2.36769  | -3.73660 | H | -1.15050 | -5.88629 | -0.04328 |
| H  | -2.45480 | 3.48852  | -2.92515 | C | -1.47884 | -3.79942 | -0.50558 |
| C  | -2.52162 | 1.48314  | -2.05823 | C | -0.03393 | -3.62895 | -0.97173 |
| C  | -2.61176 | 0.23658  | -2.73814 | H | 0.11605  | -2.56174 | -1.21638 |
| H  | -2.99477 | 0.30950  | -3.75941 | C | 0.25259  | -4.45294 | -2.24854 |
| C  | -2.52106 | -1.09042 | -2.24662 | H | 1.29578  | -4.30192 | -2.57573 |
| C  | -3.02004 | -2.17780 | -3.19172 | H | -0.41358 | -4.16973 | -3.08205 |
| H  | -2.35726 | -3.05774 | -3.16983 | H | 0.11181  | -5.53280 | -2.06407 |
| H  | -3.08771 | -1.80032 | -4.22333 | C | 0.95952  | -3.99623 | 0.15280  |
| H  | -4.02021 | -2.53579 | -2.89459 | H | 0.81475  | -3.34977 | 1.03381  |
| C  | -2.07994 | 2.94608  | -0.21338 | H | 1.99722  | -3.87915 | -0.19950 |
| C  | -3.09721 | 3.14643  | 0.76625  | H | 0.83395  | -5.04758 | 0.46783  |
| C  | -4.06231 | 2.04028  | 1.19323  | B | 0.31402  | -0.21897 | 2.02038  |
| H  | -3.80418 | 1.12953  | 0.62391  | C | 1.20957  | -1.23993 | 3.91790  |
|    |          |          |          | C | 0.90726  | 0.27862  | 4.21479  |
|    |          |          |          | C | 0.67580  | -2.22739 | 4.96142  |
|    |          |          |          | H | 0.90953  | -3.25908 | 4.64995  |
|    |          |          |          | H | 1.14418  | -2.05506 | 5.94680  |
|    |          |          |          | H | -0.41597 | -2.14753 | 5.07114  |
|    |          |          |          | C | 2.70059  | -1.51505 | 3.64927  |
|    |          |          |          | H | 2.80425  | -2.52191 | 3.21270  |
|    |          |          |          | H | 3.11184  | -0.78319 | 2.93476  |
|    |          |          |          | H | 3.30123  | -1.47429 | 4.57496  |
|    |          |          |          | C | 2.03275  | 1.03907  | 4.92574  |
|    |          |          |          | H | 2.22285  | 0.61329  | 5.92691  |

|   |          |          |          |   |          |          |          |
|---|----------|----------|----------|---|----------|----------|----------|
| H | 2.97152  | 1.01339  | 4.35200  | H | -4.42779 | -4.50844 | -1.66541 |
| H | 1.74063  | 2.09445  | 5.05877  | H | -6.06636 | -3.96397 | -2.14606 |
| C | -0.42120 | 0.49268  | 4.96567  | H | -5.64623 | -4.20439 | -0.42409 |
| H | -0.67231 | 1.56572  | 4.94686  | C | -4.32447 | 2.09330  | -1.70384 |
| H | -1.24096 | -0.05894 | 4.47790  | C | -5.05251 | 2.94211  | -0.82182 |
| H | -0.35538 | 0.16996  | 6.01910  | C | -5.97267 | 2.38252  | 0.26557  |
| O | 1.06307  | -0.13890 | 0.36797  | H | -6.03284 | 1.28929  | 0.12080  |
| P | 2.58152  | -0.08254 | -0.54749 | C | -5.38749 | 2.63837  | 1.67481  |
| C | 3.81706  | 0.99779  | 0.30063  | H | -4.38148 | 2.20064  | 1.79633  |
| C | 5.16744  | 1.02268  | -0.12163 | H | -6.04364 | 2.20586  | 2.45087  |
| C | 3.40887  | 1.81011  | 1.37894  | H | -5.30359 | 3.72161  | 1.87375  |
| C | 6.08847  | 1.87065  | 0.51138  | C | -7.40884 | 2.94401  | 0.16471  |
| H | 5.49956  | 0.37049  | -0.93558 | H | -8.06155 | 2.46977  | 0.91823  |
| C | 4.34045  | 2.65435  | 2.00779  | H | -7.85059 | 2.76322  | -0.83019 |
| H | 2.37894  | 1.74810  | 1.75018  | H | -7.43258 | 4.03300  | 0.34557  |
| C | 5.67459  | 2.69215  | 1.57399  | C | -4.88722 | 4.33565  | -0.94222 |
| H | 7.13101  | 1.88576  | 0.17627  | H | -5.44083 | 4.99878  | -0.26786 |
| H | 4.01670  | 3.27955  | 2.84630  | C | -4.02730 | 4.88749  | -1.89905 |
| H | 6.39523  | 3.35225  | 2.06837  | H | -3.91230 | 5.97388  | -1.97561 |
| C | 3.54473  | -1.60760 | -0.91417 | C | -3.30919 | 4.04120  | -2.75247 |
| C | 3.49550  | -2.24960 | -2.17573 | H | -2.62771 | 4.47420  | -3.49311 |
| C | 4.29826  | -2.20795 | 0.12695  | C | -3.43837 | 2.64114  | -2.67551 |
| C | 4.19083  | -3.44863 | -2.38818 | C | -2.60108 | 1.75038  | -3.59604 |
| H | 2.92876  | -1.80067 | -2.99678 | H | -2.97441 | 0.71622  | -3.48624 |
| C | 4.99046  | -3.40490 | -0.09550 | C | -2.74633 | 2.13375  | -5.08520 |
| H | 4.34625  | -1.73010 | 1.11007  | H | -2.34117 | 3.14032  | -5.28934 |
| C | 4.94048  | -4.03311 | -1.35262 | H | -3.80158 | 2.12719  | -5.40810 |
| H | 4.15531  | -3.92269 | -3.37501 | H | -2.19051 | 1.42177  | -5.71972 |
| H | 5.57268  | -3.84973 | 0.71850  | C | -1.11384 | 1.76177  | -3.16632 |
| H | 5.48226  | -4.96868 | -1.52398 | H | -0.51813 | 1.09176  | -3.81148 |
| C | 2.26450  | 0.64942  | -2.21342 | H | -0.98357 | 1.43961  | -2.11824 |
| C | 3.10503  | 1.62503  | -2.79387 | H | -0.69015 | 2.77780  | -3.25592 |
| C | 1.13031  | 0.20581  | -2.93210 | C | -3.15946 | -3.12472 | 0.32221  |
| C | 2.82147  | 2.13327  | -4.07074 | C | -3.67794 | -3.41562 | 1.61692  |
| H | 3.98146  | 1.98673  | -2.24797 | C | -4.92296 | -2.71446 | 2.16571  |
| C | 0.85504  | 0.71342  | -4.21133 | H | -5.37524 | -2.13971 | 1.33845  |
| H | 0.45322  | -0.53703 | -2.49538 | C | -4.54568 | -1.70924 | 3.27994  |
| C | 1.69979  | 1.67761  | -4.78459 | H | -5.44339 | -1.18030 | 3.64653  |
| H | 3.48375  | 2.88662  | -4.51065 | H | -3.82037 | -0.95319 | 2.93204  |
| H | -0.03373 | 0.36271  | -4.74454 | H | -4.09004 | -2.23253 | 4.13954  |
| H | 1.48233  | 2.07739  | -5.78037 | C | -5.98748 | -3.71214 | 2.67399  |

## F

SCF (BP86) Energy = -2428.31094711  
 Enthalpy 0K = -2427.245123  
 Energy 298K = -2427.177011  
 Free Energy 298K = -2427.364509  
 Lowest Frequency = 2.6620 cm<sup>-1</sup>  
 Second Frequency = 3.1129 cm<sup>-1</sup>  
 SCF (BP86-D3BJ) Energy = -2428.61240846  
 SCF (Toluene) Energy = -2428.32231814  
 SCF (BS2) Energy = -2962.97465215

|    |          |          |          |   |          |          |          |
|----|----------|----------|----------|---|----------|----------|----------|
| Mg | -3.01232 | -0.22607 | -0.36227 | H | -6.27367 | -4.43849 | 1.89410  |
| O  | -1.99937 | 1.07562  | 2.51883  | H | -6.89848 | -3.17452 | 2.98970  |
| O  | 0.19472  | 1.43239  | 1.82391  | C | -2.99337 | -4.34828 | 2.41968  |
| N  | -4.40099 | 0.66091  | -1.54115 | H | -3.37955 | -4.57765 | 3.41921  |
| N  | -3.77914 | -2.09695 | -0.48005 | C | -1.82775 | -4.98020 | 1.96989  |
| C  | -6.29235 | 0.68099  | -3.13745 | H | -1.30897 | -5.70057 | 2.61114  |
| H  | -6.88335 | 1.43141  | -2.58497 | C | -1.32604 | -4.68073 | 0.69784  |
| H  | -6.98332 | -0.01693 | -3.63166 | H | -0.40905 | -5.16966 | 0.35069  |
| H  | -5.73361 | 1.23608  | -3.91032 | C | -1.97260 | -3.75727 | -0.14638 |
| C  | -5.33946 | -0.04750 | -2.20460 | C | -1.37322 | -3.43498 | -1.51706 |
| C  | -5.50056 | -1.45222 | -2.09214 | H | -2.10656 | -2.81159 | -2.06032 |
| H  | -6.30160 | -1.86930 | -2.70672 | C | -1.13349 | -4.70301 | -2.36639 |
| C  | -4.80734 | -2.40271 | -1.29988 | H | -0.77386 | -4.42759 | -3.37304 |
| C  | -5.26933 | -3.84698 | -1.39779 | H | -2.05635 | -5.29667 | -2.48374 |
|    |          |          |          | H | -0.36990 | -5.35877 | -1.91272 |
|    |          |          |          | C | -0.06934 | -2.61336 | -1.37270 |
|    |          |          |          | H | -0.23316 | -1.67104 | -0.82111 |
|    |          |          |          | H | 0.34343  | -2.36409 | -2.36636 |
|    |          |          |          | H | 0.69839  | -3.18929 | -0.82646 |
|    |          |          |          | B | -1.06907 | 0.94222  | 1.45461  |
|    |          |          |          | C | -1.24225 | 1.44939  | 3.70927  |
|    |          |          |          | C | 0.03658  | 2.14489  | 3.08453  |
|    |          |          |          | C | -2.11063 | 2.35840  | 4.58469  |
|    |          |          |          | H | -2.98490 | 1.79678  | 4.95403  |
|    |          |          |          | H | -1.54438 | 2.71767  | 5.46153  |

|                                            |          |          |          |   |         |          |          |
|--------------------------------------------|----------|----------|----------|---|---------|----------|----------|
| H                                          | -2.47826 | 3.23026  | 4.02297  | C | 6.27733 | 1.95812  | 1.33112  |
| C                                          | -0.90254 | 0.14957  | 4.46183  | H | 6.25906 | 2.79474  | 0.61884  |
| H                                          | -1.83634 | -0.38976 | 4.68957  | H | 7.27198 | 1.48618  | 1.30713  |
| H                                          | -0.26860 | -0.50908 | 3.84562  | H | 6.13781 | 2.37490  | 2.34435  |
| H                                          | -0.37930 | 0.35032  | 5.41207  | C | 5.18972 | 0.93066  | 1.03171  |
| C                                          | 1.32280  | 1.98776  | 3.90251  | C | 5.42476 | -0.34971 | 1.61176  |
| H                                          | 1.22091  | 2.46389  | 4.89322  | H | 6.28094 | -0.36678 | 2.29376  |
| H                                          | 1.58380  | 0.92859  | 4.04648  | C | 4.97266 | -1.64369 | 1.24632  |
| H                                          | 2.16040  | 2.47433  | 3.37600  | C | 5.84987 | -2.77394 | 1.78222  |
| C                                          | -0.19812 | 3.62824  | 2.74133  | H | 5.37851 | -3.76084 | 1.68677  |
| H                                          | 0.63994  | 3.98831  | 2.12286  | H | 6.08985 | -2.58671 | 2.84229  |
| H                                          | -1.12897 | 3.75853  | 2.16487  | H | 6.81045 | -2.80698 | 1.23992  |
| H                                          | -0.25468 | 4.25641  | 3.64652  | C | 3.81984 | -3.23789 | -0.11594 |
| O                                          | -1.38088 | 0.41828  | 0.26255  | C | 4.61360 | -3.57399 | -1.25520 |
| P                                          | 6.88733  | -0.32279 | 0.81128  | C | 4.51881 | -4.87188 | -1.79581 |
| C                                          | 5.63549  | 0.91569  | 0.17752  | H | 5.13191 | -5.12927 | -2.66688 |
| C                                          | 5.93256  | 1.96414  | -0.71899 | C | 3.66761 | -5.83535 | -1.24869 |
| C                                          | 4.31531  | 0.78765  | 0.66448  | H | 3.61199 | -6.83919 | -1.68267 |
| C                                          | 4.92556  | 2.85582  | -1.12447 | C | 2.88594 | -5.49831 | -0.13958 |
| H                                          | 6.95395  | 2.08468  | -1.09468 | H | 2.21784 | -6.24941 | 0.29426  |
| C                                          | 3.30425  | 1.67127  | 0.25285  | C | 2.93988 | -4.21569 | 0.44068  |
| H                                          | 4.07767  | -0.01232 | 1.37579  | C | 2.09249 | -3.93784 | 1.68155  |
| C                                          | 3.61416  | 2.70918  | -0.64314 | H | 2.01859 | -2.84143 | 1.78215  |
| H                                          | 5.16887  | 3.66766  | -1.81923 | C | 2.77111 | -4.48958 | 2.95893  |
| H                                          | 2.28505  | 1.55704  | 0.64030  | H | 2.92561 | -5.57969 | 2.87108  |
| H                                          | 2.83166  | 3.40653  | -0.96137 | H | 2.13895 | -4.31173 | 3.84676  |
| C                                          | 8.50561  | 0.52521  | 0.39432  | H | 3.75309 | -4.02577 | 3.14381  |
| C                                          | 9.21703  | 0.34381  | -0.81046 | C | 0.66066 | -4.50614 | 1.57889  |
| C                                          | 9.04893  | 1.37596  | 1.38295  | H | 0.65367 | -5.60944 | 1.62230  |
| C                                          | 10.43788 | 1.00584  | -1.02345 | H | 0.15884 | -4.19885 | 0.64850  |
| H                                          | 8.81463  | -0.32105 | -1.58155 | H | 0.04784 | -4.15224 | 2.42677  |
| C                                          | 10.26248 | 2.04541  | 1.16494  | C | 5.57113 | -2.58862 | -1.93098 |
| H                                          | 8.51562  | 1.51035  | 2.33151  | H | 5.48781 | -1.61882 | -1.41116 |
| C                                          | 10.96173 | 1.85962  | -0.03946 | C | 7.04277 | -3.05594 | -1.83374 |
| H                                          | 10.98026 | 0.85377  | -1.96321 | H | 7.19906 | -3.99809 | -2.38843 |
| H                                          | 10.66783 | 2.70458  | 1.94028  | H | 7.35208 | -3.23236 | -0.79078 |
| H                                          | 11.91418 | 2.37365  | -0.20733 | H | 7.71880 | -2.29796 | -2.26665 |
| C                                          | 6.81584  | -1.65296 | -0.50662 | C | 5.19388 | -2.37023 | -3.41404 |
| C                                          | 6.16108  | -1.51196 | -1.74810 | H | 5.25110 | -3.31178 | -3.98744 |
| C                                          | 7.43167  | -2.88698 | -0.19861 | H | 5.88659 | -1.65377 | -3.88876 |
| C                                          | 6.13310  | -2.57792 | -2.66313 | H | 4.16890 | -1.97800 | -3.52091 |
| H                                          | 5.66865  | -0.56601 | -1.99542 | C | 4.07502 | 2.51944  | -0.41056 |
| C                                          | 7.41331  | -3.94673 | -1.11777 | C | 4.33762 | 2.55662  | -1.81481 |
| H                                          | 7.92596  | -3.01654 | 0.77156  | C | 4.21917 | 3.77860  | -2.50248 |
| C                                          | 6.76096  | -3.79491 | -2.35296 | H | 4.41672 | 3.80714  | -3.57795 |
| H                                          | 5.61854  | -2.45485 | -3.62257 | C | 3.85954 | 4.95823  | -1.84304 |
| H                                          | 7.89944  | -4.89536 | -0.86519 | H | 3.76662 | 5.89774  | -2.39755 |
| H                                          | 6.73688  | -4.62449 | -3.06769 | C | 3.62886 | 4.92159  | -0.46709 |
| <b>G</b>                                   |          |          |          | H | 3.35898 | 5.84483  | 0.05739  |
| SCF (BP86) Energy = -2997.33241049         |          |          |          | C | 3.73117 | 3.72528  | 0.27239  |
| Enthalpy 0K = -2995.969546                 |          |          |          | C | 4.83179 | 1.32308  | -2.57077 |
| Energy 298K = -2995.885630                 |          |          |          | H | 4.39670 | 0.43106  | -2.08200 |
| Free Energy 298K = -2996.095517            |          |          |          | C | 6.37126 | 1.21013  | -2.44879 |
| Lowest Frequency = 4.1733 cm <sup>-1</sup> |          |          |          | H | 6.85663 | 2.10339  | -2.88057 |
| Second Frequency = 9.5333 cm <sup>-1</sup> |          |          |          | H | 6.74657 | 0.32460  | -2.99140 |
| SCF (BP86-D3BJ) Energy = -2997.75644120    |          |          |          | H | 6.69222 | 1.12583  | -1.39787 |
| SCF (Toluene) Energy = -2997.34230932      |          |          |          | C | 4.41418 | 1.30138  | -4.05504 |
| SCF (BS2) Energy = -3532.14042606          |          |          |          | H | 3.33395 | 1.48437  | -4.17703 |
|                                            |          |          |          | H | 4.65116 | 0.32201  | -4.50208 |
|                                            |          |          |          | H | 4.95588 | 2.06143  | -4.64546 |
| Mg                                         | 2.61926  | -0.25072 | 0.20705  | C | 3.47397 | 3.80821  | 1.77818  |
| O                                          | -1.22350 | 0.43200  | -0.98487 | H | 3.65086 | 2.80719  | 2.20503  |
| O                                          | 1.13535  | -0.02492 | -1.07422 | C | 2.01277 | 4.21122  | 2.08410  |
| O                                          | -0.57642 | 1.26625  | 2.29143  | H | 1.85150 | 4.29300  | 3.17479  |
| O                                          | 1.26214  | -0.04586 | 1.84363  | H | 1.28792 | 3.48775  | 1.67793  |
| N                                          | 4.12547  | 1.23730  | 0.26654  | H | 1.77537 | 5.19571  | 1.64526  |
| N                                          | 3.90854  | -1.90586 | 0.44964  | C | 4.43714 | 4.79970  | 2.47560  |

|   |           |          |          |
|---|-----------|----------|----------|
| H | 5.49405   | 4.58020  | 2.25427  |
| H | 4.29992   | 4.76295  | 3.57089  |
| H | 4.24125   | 5.83793  | 2.15570  |
| C | 1.17771   | 0.02569  | 3.34134  |
| C | 2.26155   | 0.99874  | 3.81413  |
| H | 2.29524   | 1.03996  | 4.91598  |
| H | 2.08463   | 2.01380  | 3.43434  |
| H | 3.24704   | 0.65225  | 3.45724  |
| C | 1.43618   | -1.35516 | 3.93866  |
| H | 2.47508   | -1.66672 | 3.74510  |
| H | 0.75702   | -2.11781 | 3.53321  |
| H | 1.29761   | -1.31607 | 5.03344  |
| C | -0.29726  | 0.55291  | 3.54111  |
| C | -0.46506  | 1.53852  | 4.70271  |
| H | 0.16467   | 2.43150  | 4.57532  |
| H | -0.21346  | 1.06097  | 5.66554  |
| H | -1.51587  | 1.86617  | 4.75192  |
| C | -1.34718  | -0.56825 | 3.64441  |
| H | -1.27269  | -1.11285 | 4.60083  |
| H | -1.25256  | -1.28865 | 2.81587  |
| H | -2.34965  | -0.11715 | 3.57665  |
| C | 0.44643   | -0.83859 | -2.07857 |
| C | 1.11947   | -2.20858 | -2.17450 |
| H | 2.14528   | -2.11752 | -2.57187 |
| H | 0.55919   | -2.86510 | -2.86248 |
| H | 1.17649   | -2.71669 | -1.19927 |
| C | 0.54537   | -0.11739 | -3.43496 |
| H | 0.00137   | 0.83824  | -3.41336 |
| H | 0.13413   | -0.73934 | -4.24827 |
| H | 1.60472   | 0.08789  | -3.66181 |
| C | -1.03333  | -0.87590 | -1.52483 |
| C | -2.09052  | -1.11114 | -2.61746 |
| H | -3.08580  | -1.19207 | -2.14977 |
| H | -1.89592  | -2.05167 | -3.16458 |
| H | -2.10390  | -0.27813 | -3.33690 |
| C | -1.22653  | -1.93099 | -0.41275 |
| H | -0.47167  | -1.81370 | 0.38429  |
| H | -1.16625  | -2.96262 | -0.80243 |
| H | -2.23100  | -1.79889 | 0.02032  |
| B | 0.04855   | 0.99166  | -0.45850 |
| B | 0.21908   | 0.77726  | 1.27609  |
| C | 0.25522   | 2.51704  | -0.99390 |
| H | 1.22808   | 2.94099  | -0.67146 |
| H | 0.29826   | 2.50279  | -2.10295 |
| C | -0.87486  | 3.47670  | -0.56830 |
| H | -1.84763  | 3.04286  | -0.87137 |
| H | -0.91069  | 3.54781  | 0.53921  |
| C | -0.75203  | 4.89700  | -1.15069 |
| H | -0.74010  | 4.83177  | -2.25664 |
| H | 0.23126   | 5.32199  | -0.86712 |
| C | -1.87589  | 5.84606  | -0.70454 |
| H | -1.76519  | 6.85330  | -1.14412 |
| H | -2.86621  | 5.45787  | -1.00319 |
| H | -1.88854  | 5.96157  | 0.39464  |
| P | -6.04596  | -0.74244 | -0.39267 |
| C | -7.56532  | -1.58089 | 0.25971  |
| C | -7.37003  | -2.79953 | 0.94049  |
| C | -8.86997  | -1.07456 | 0.09128  |
| C | -8.46988  | -3.49459 | 1.46606  |
| H | -6.35364  | -3.19668 | 1.03025  |
| C | -9.96751  | -1.77218 | 0.62149  |
| H | -9.03157  | -0.14805 | -0.47030 |
| C | -9.76794  | -2.97937 | 1.31160  |
| H | -8.31457  | -4.44277 | 1.99177  |
| H | -10.98019 | -1.37745 | 0.48638  |
| H | -10.62596 | -3.52394 | 1.72002  |
| C | -5.62018  | 0.58323  | 0.82191  |

|   |          |          |          |
|---|----------|----------|----------|
| C | -4.27967 | 1.02455  | 0.86187  |
| C | -6.57317 | 1.14002  | 1.70062  |
| C | -3.90500 | 2.02368  | 1.77565  |
| H | -3.52334 | 0.59584  | 0.19299  |
| C | -6.19244 | 2.14570  | 2.60336  |
| H | -7.60651 | 0.77736  | 1.69351  |
| C | -4.85937 | 2.58649  | 2.64046  |
| H | -2.85918 | 2.34256  | 1.81265  |
| H | -6.93558 | 2.57576  | 3.28366  |
| H | -4.56283 | 3.36829  | 3.34855  |
| C | -6.58866 | 0.12808  | -1.93267 |
| C | -6.41035 | -0.55332 | -3.15369 |
| C | -7.15913 | 1.41674  | -1.92484 |
| C | -6.81662 | 0.04491  | -4.35584 |
| H | -5.93559 | -1.53979 | -3.14757 |
| C | -7.56750 | 2.00958  | -3.13076 |
| H | -7.26388 | 1.96439  | -0.98204 |
| C | -7.39939 | 1.32359  | -4.34476 |
| H | -6.67230 | -0.48445 | -5.30363 |
| H | -8.00582 | 3.01320  | -3.12276 |
| H | -7.71297 | 1.79054  | -5.28451 |
| O | -4.90692 | -1.74476 | -0.64092 |

#### TS (G-H)

SCF (BP86) Energy = -2997.28547065

Enthalpy 0K = -2995.922906

Energy 298K = -2995.840994

Free Energy 298K = -2996.039171

Lowest Frequency = -342.3941 cm<sup>-1</sup>

Second Frequency = 8.4959 cm<sup>-1</sup>

SCF (BP86-D3BJ) Energy = -2997.73978307

SCF (Toluene) Energy = -2997.29272996

SCF (BS2) Energy = -3532.08520790

|    |          |          |          |
|----|----------|----------|----------|
| Mg | 1.61771  | -0.15600 | 0.40253  |
| O  | -0.76583 | 1.68329  | -2.52542 |
| O  | 1.01822  | 0.75641  | -1.28965 |
| O  | -1.88890 | 2.05773  | 1.23465  |
| O  | -0.09725 | 0.52656  | 1.32845  |
| N  | 3.59599  | 0.45732  | 0.97741  |
| N  | 1.97313  | -2.25414 | 0.82061  |
| C  | 5.27466  | 0.27173  | 2.84532  |
| H  | 5.68418  | 1.21607  | 2.46475  |
| H  | 6.07503  | -0.48647 | 2.83610  |
| H  | 4.98637  | 0.40894  | 3.90253  |
| C  | 4.06072  | -0.21568 | 2.05336  |
| C  | 3.51709  | -1.42937 | 2.55019  |
| H  | 3.98180  | -1.76117 | 3.48432  |
| C  | 2.72755  | -2.43342 | 1.92720  |
| C  | 2.80826  | -3.79094 | 2.62297  |
| H  | 2.48277  | -4.61281 | 1.97076  |
| H  | 2.16053  | -3.79151 | 3.51741  |
| H  | 3.83517  | -3.99225 | 2.96586  |
| C  | 1.38719  | -3.41860 | 0.17855  |
| C  | 2.03570  | -3.98581 | -0.96697 |
| C  | 1.40187  | -5.03091 | -1.66722 |
| H  | 1.89084  | -5.45440 | -2.54891 |
| C  | 0.17084  | -5.55189 | -1.25612 |
| H  | -0.30466 | -6.36298 | -1.81794 |
| C  | -0.41799 | -5.05102 | -0.09415 |
| H  | -1.35351 | -5.49129 | 0.26830  |
| C  | 0.17250  | -4.00676 | 0.64888  |
| C  | -0.49720 | -3.63436 | 1.97290  |
| H  | 0.09670  | -2.82659 | 2.43415  |
| C  | -0.52068 | -4.83814 | 2.94881  |
| H  | -1.19370 | -5.63144 | 2.57905  |
| H  | -0.89871 | -4.52053 | 3.93654  |



|   |          |          |          |                     |                |          |          |
|---|----------|----------|----------|---------------------|----------------|----------|----------|
| H | 0.47433  | -5.28897 | 3.08921  | C                   | 2.28336        | 1.61376  | -3.19522 |
| C | -1.93565 | -3.11997 | 1.77347  | H                   | 1.83596        | 2.61802  | -3.16286 |
| H | -2.55356 | -3.86766 | 1.24710  | H                   | 2.61525        | 1.41555  | -4.22900 |
| H | -1.94929 | -2.18566 | 1.19044  | H                   | 3.17095        | 1.61033  | -2.54082 |
| H | -2.42054 | -2.92059 | 2.74356  | C                   | -0.14704       | 0.68817  | -3.35198 |
| C | 3.44360  | -3.56403 | -1.39461 | C                   | -0.13372       | 1.20956  | -4.79883 |
| H | 3.54939  | -2.48725 | -1.17363 | H                   | -1.17104       | 1.29466  | -5.16267 |
| C | 4.51521  | -4.30875 | -0.56031 | H                   | 0.40423        | 0.51765  | -5.47111 |
| H | 4.41695  | -5.40123 | -0.68970 | H                   | 0.33075        | 2.20480  | -4.86705 |
| H | 4.43219  | -4.08387 | 0.51380  | C                   | -0.96253       | -0.61536 | -3.28448 |
| H | 5.52954  | -4.01872 | -0.88797 | H                   | -0.98524       | -1.00951 | -2.25891 |
| C | 3.72498  | -3.78830 | -2.89521 | H                   | -0.56975       | -1.38862 | -3.96737 |
| H | 3.82455  | -4.86214 | -3.13338 | H                   | -2.00249       | -0.39916 | -3.57575 |
| H | 4.67668  | -3.31074 | -3.17875 | B                   | -0.17415       | 1.73624  | -1.20555 |
| H | 2.93073  | -3.37174 | -3.53528 | B                   | -1.19690       | 1.10360  | 0.40093  |
| C | 4.49257  | 1.42385  | 0.36731  | C                   | 0.20725        | 3.28204  | -0.83274 |
| C | 5.57300  | 0.96082  | -0.44930 | H                   | 0.58384        | 3.38409  | 0.19628  |
| C | 6.44429  | 1.90016  | -1.03717 | H                   | 1.06318        | 3.55213  | -1.48924 |
| H | 7.27423  | 1.53904  | -1.65446 | C                   | -0.93289       | 4.28923  | -1.06973 |
| C | 6.27993  | 3.27237  | -0.84591 | H                   | -1.30627       | 4.16122  | -2.10420 |
| H | 6.96677  | 3.98703  | -1.31140 | H                   | -1.77857       | 4.04340  | -0.40099 |
| C | 5.22446  | 3.72127  | -0.04718 | C                   | -0.53055       | 5.76122  | -0.86220 |
| H | 5.09687  | 4.79588  | 0.10839  | H                   | 0.33565        | 6.00017  | -1.51143 |
| C | 4.32518  | 2.82987  | 0.57126  | H                   | -0.17404       | 5.90232  | 0.17735  |
| C | 5.86662  | -0.51973 | -0.70809 | C                   | -1.67214       | 6.75033  | -1.14837 |
| H | 5.04312  | -1.11444 | -0.27680 | H                   | -1.36104       | 7.79737  | -0.98615 |
| C | 7.18498  | -0.96623 | -0.03043 | H                   | -2.01973       | 6.66369  | -2.19368 |
| H | 8.04966  | -0.43543 | -0.46696 | H                   | -2.54217       | 6.55348  | -0.49680 |
| H | 7.34852  | -2.04860 | -0.17573 | P                   | -3.82263       | -0.13900 | -0.05918 |
| H | 7.18568  | -0.76321 | 1.05154  | C                   | -4.65132       | 1.38235  | -0.70764 |
| C | 5.94866  | -0.83004 | -2.21966 | C                   | -5.98725       | 1.70913  | -0.38212 |
| H | 5.02613  | -0.54579 | -2.75142 | C                   | -3.94791       | 2.18607  | -1.63220 |
| H | 6.12453  | -1.90747 | -2.38061 | C                   | -6.59969       | 2.83655  | -0.95241 |
| H | 6.78470  | -0.29083 | -2.69787 | H                   | -6.55221       | 1.08469  | 0.31548  |
| C | 3.24685  | 3.40889  | 1.48928  | C                   | -4.57224       | 3.30622  | -2.20079 |
| H | 2.36704  | 2.74167  | 1.41535  | H                   | -2.91801       | 1.93653  | -1.91103 |
| C | 2.80238  | 4.83119  | 1.08921  | C                   | -5.89378       | 3.64015  | -1.86147 |
| H | 1.91088  | 5.12349  | 1.66869  | H                   | -7.63364       | 3.08120  | -0.68574 |
| H | 2.54861  | 4.90238  | 0.02029  | H                   | -4.01318       | 3.92436  | -2.91075 |
| H | 3.58456  | 5.57789  | 1.31398  | H                   | -6.37262       | 4.51922  | -2.30606 |
| C | 3.70251  | 3.43111  | 2.96886  | C                   | -4.10664       | -1.39779 | -1.39492 |
| H | 3.90155  | 2.42361  | 3.36201  | C                   | -3.22046       | -2.48280 | -1.55534 |
| H | 2.92639  | 3.89515  | 3.60298  | C                   | -5.23974       | -1.30905 | -2.23175 |
| H | 4.62590  | 4.02758  | 3.07630  | C                   | -3.47072       | -3.46864 | -2.52366 |
| C | -0.44099 | 0.87707  | 2.72354  | H                   | -2.32650       | -2.55293 | -0.93181 |
| C | 0.84493  | 1.05806  | 3.53389  | C                   | -5.48406       | -2.29277 | -3.20262 |
| H | 0.60511  | 1.35636  | 4.56949  | H                   | -5.92833       | -0.46493 | -2.12783 |
| H | 1.50482  | 1.82411  | 3.10457  | C                   | -4.60267       | -3.37674 | -3.34849 |
| H | 1.40641  | 0.10742  | 3.58491  | H                   | -2.76803       | -4.30111 | -2.63385 |
| C | -1.25350 | -0.27265 | 3.33329  | H                   | -6.36590       | -2.20967 | -3.84688 |
| H | -0.65829 | -1.19718 | 3.30206  | H                   | -4.79494       | -4.14311 | -4.10701 |
| H | -2.19252 | -0.44331 | 2.78745  | C                   | -4.94275       | -0.73856 | 1.30546  |
| H | -1.49530 | -0.06499 | 4.38959  | C                   | -5.30274       | -2.10453 | 1.42654  |
| C | -1.30975 | 2.19251  | 2.54655  | C                   | -5.27737       | 0.14321  | 2.36689  |
| C | -0.48826 | 3.49333  | 2.63891  | C                   | -5.99312       | -2.56184 | 2.55809  |
| H | 0.41539  | 3.45999  | 2.01716  | H                   | -5.05891       | -2.80378 | 0.62092  |
| H | -0.18580 | 3.70223  | 3.67981  | C                   | -5.97703       | -0.31959 | 3.48896  |
| H | -1.11084 | 4.33059  | 2.28477  | H                   | -4.99987       | 1.19991  | 2.29634  |
| C | -2.46282 | 2.31328  | 3.56082  | C                   | -6.33593       | -1.67581 | 3.59422  |
| H | -2.07898 | 2.39141  | 4.59340  | H                   | -6.27691       | -3.61815 | 2.62425  |
| H | -3.15294 | 1.45997  | 3.50770  | H                   | -6.24359       | 0.38305  | 4.28623  |
| H | -3.03416 | 3.23101  | 3.34292  | H                   | -6.87737       | -2.03734 | 4.47436  |
| C | 1.29112  | 0.53673  | -2.72044 | O                   | -2.04589       | 0.19997  | -0.30872 |
| C | 1.91125  | -0.84506 | -2.90386 |                     |                |          |          |
| H | 2.92307  | -0.87045 | -2.46612 | <b>H</b>            |                |          |          |
| H | 2.01615  | -1.07634 | -3.97797 | SCF (BP86) Energy = | -2295.93172227 |          |          |
| H | 1.30476  | -1.63986 | -2.44145 | Enthalpy 0K =       | -2294.834434   |          |          |

Energy 298K = -2294.769155  
 Free Energy 298K = -2294.934065  
 Lowest Frequency = 11.0147 cm<sup>-1</sup>  
 Second Frequency = 16.2041 cm<sup>-1</sup>  
 SCF (BP86-D3BJ) Energy = -2296.24915893  
 SCF (Toluene) Energy = -2295.93884723  
 SCF (BS2) Energy = -2495.73851316

|    |          |          |          |
|----|----------|----------|----------|
| Mg | -0.54090 | 0.23947  | -0.07344 |
| O  | 1.08937  | -1.49104 | 2.73513  |
| O  | -0.08897 | 0.36521  | 1.89209  |
| O  | 3.27014  | -1.97071 | -0.14657 |
| O  | 2.14993  | -0.95415 | -1.91355 |
| N  | -0.69779 | 1.99897  | -1.18094 |
| N  | -2.01011 | -0.78939 | -1.12206 |
| C  | -1.19363 | 3.15317  | -3.34373 |
| H  | -1.12593 | 4.09382  | -2.77841 |
| H  | -2.09782 | 3.17323  | -3.97175 |
| H  | -0.32390 | 3.10863  | -4.02267 |
| C  | -1.20490 | 1.93457  | -2.42802 |
| C  | -1.78182 | 0.76982  | -3.00056 |
| H  | -2.03880 | 0.87553  | -4.05809 |
| C  | -2.20494 | -0.44721 | -2.41840 |
| C  | -2.91610 | -1.41234 | -3.35936 |
| H  | -3.74890 | -1.93484 | -2.86529 |
| H  | -2.20493 | -2.18806 | -3.69546 |
| H  | -3.29604 | -0.89477 | -4.25277 |
| C  | -2.76331 | -1.89776 | -0.58434 |
| C  | -4.03507 | -1.62525 | 0.01570  |
| C  | -4.75869 | -2.69306 | 0.57979  |
| H  | -5.73265 | -2.49627 | 1.03908  |
| C  | -4.25908 | -4.00139 | 0.56689  |
| H  | -4.83788 | -4.81738 | 1.01248  |
| C  | -3.01614 | -4.25554 | -0.01896 |
| H  | -2.62577 | -5.27937 | -0.02949 |
| C  | -2.24843 | -3.22633 | -0.60242 |
| C  | -0.90814 | -3.59339 | -1.24585 |
| H  | -0.47282 | -2.67108 | -1.67106 |
| C  | -1.09777 | -4.61088 | -2.39660 |
| H  | -1.45305 | -5.58394 | -2.01388 |
| H  | -0.13981 | -4.79034 | -2.91513 |
| H  | -1.83169 | -4.26315 | -3.14257 |
| C  | 0.09012  | -4.15604 | -0.20718 |
| H  | -0.32601 | -5.04228 | 0.30367  |
| H  | 0.35306  | -3.41140 | 0.55924  |
| H  | 1.02508  | -4.47493 | -0.70056 |
| C  | -4.63341 | -0.21334 | 0.02132  |
| H  | -3.78606 | 0.49757  | -0.00199 |
| C  | -5.48446 | 0.05320  | -1.24460 |
| H  | -6.30798 | -0.67920 | -1.31977 |
| H  | -4.88567 | -0.00805 | -2.16583 |
| H  | -5.93088 | 1.06250  | -1.20233 |
| C  | -5.48047 | 0.09247  | 1.27515  |
| H  | -6.43294 | -0.46671 | 1.27320  |
| H  | -5.74128 | 1.16471  | 1.29858  |
| H  | -4.94787 | -0.15149 | 2.20851  |
| C  | -0.22543 | 3.26079  | -0.66042 |
| C  | -1.04907 | 3.96281  | 0.27321  |
| C  | -0.56464 | 5.15379  | 0.84479  |
| H  | -1.18850 | 5.69815  | 1.56024  |
| C  | 0.69969  | 5.65829  | 0.51663  |
| H  | 1.06097  | 6.58425  | 0.97629  |
| C  | 1.49278  | 4.97136  | -0.40582 |
| H  | 2.47945  | 5.36931  | -0.66837 |
| C  | 1.05657  | 3.77567  | -1.01249 |
| C  | -2.45974 | 3.47231  | 0.60671  |
| H  | -2.44485 | 2.36637  | 0.55358  |

|   |          |          |          |
|---|----------|----------|----------|
| C | -3.48157 | 3.95753  | -0.44972 |
| H | -3.51170 | 5.06117  | -0.47896 |
| H | -4.49613 | 3.59563  | -0.20519 |
| H | -3.22865 | 3.59639  | -1.45874 |
| C | -2.93942 | 3.86729  | 2.01741  |
| H | -2.20079 | 3.60437  | 2.79323  |
| H | -3.88602 | 3.35108  | 2.25303  |
| H | -3.13894 | 4.95074  | 2.09526  |
| C | 1.98183  | 3.09948  | -2.02810 |
| H | 1.46694  | 2.20758  | -2.42443 |
| C | 3.29104  | 2.61881  | -1.36621 |
| H | 3.95066  | 2.14748  | -2.11603 |
| H | 3.08949  | 1.88405  | -0.57114 |
| H | 3.84599  | 3.45954  | -0.91436 |
| C | 2.31515  | 4.03763  | -3.21340 |
| H | 1.40912  | 4.44294  | -3.69242 |
| H | 2.89757  | 3.49684  | -3.97989 |
| H | 2.92459  | 4.89691  | -2.88238 |
| C | 3.22921  | -1.73217 | -2.52607 |
| C | 3.87019  | -0.88559 | -3.63092 |
| H | 4.72383  | -1.41706 | -4.08560 |
| H | 4.22405  | 0.08296  | -3.24823 |
| H | 3.13017  | -0.69046 | -4.42453 |
| C | 2.58977  | -2.98789 | -3.14125 |
| H | 1.81591  | -2.67889 | -3.86273 |
| H | 2.10894  | -3.61028 | -2.37018 |
| H | 3.33366  | -3.60357 | -3.67399 |
| C | 4.18144  | -2.04607 | -1.28814 |
| C | 5.26551  | -0.97734 | -1.06529 |
| H | 4.83032  | 0.03414  | -1.02853 |
| H | 6.03200  | -1.00232 | -1.85801 |
| H | 5.75993  | -1.16720 | -0.09924 |
| C | 4.81560  | -3.44122 | -1.30033 |
| H | 5.48195  | -3.56318 | -2.17155 |
| H | 4.05433  | -4.23504 | -1.32429 |
| H | 5.41905  | -3.57800 | -0.38827 |
| C | -0.70215 | 0.03289  | 3.17387  |
| C | -2.22369 | 0.13077  | 3.03787  |
| H | -2.52456 | 1.17174  | 2.83332  |
| H | -2.71558 | -0.18006 | 3.97571  |
| H | -2.60406 | -0.51447 | 2.22978  |
| C | -0.21249 | 1.06204  | 4.21023  |
| H | 0.87418  | 0.99490  | 4.36830  |
| H | -0.71474 | 0.92028  | 5.18177  |
| H | -0.44048 | 2.07713  | 3.84511  |
| C | -0.16096 | -1.44009 | 3.44032  |
| C | 0.11534  | -1.73436 | 4.92688  |
| H | 0.50079  | -2.76258 | 5.02534  |
| H | -0.80440 | -1.65701 | 5.53373  |
| H | 0.87238  | -1.05177 | 5.34092  |
| C | -1.09573 | -2.53466 | 2.89137  |
| H | -1.35998 | -2.36849 | 1.83553  |
| H | -2.03216 | -2.61427 | 3.47026  |
| H | -0.57228 | -3.50238 | 2.95346  |
| B | 1.26911  | -0.38106 | 1.83332  |
| B | 2.17900  | -1.21738 | -0.54400 |
| C | 2.59587  | 0.51631  | 2.11537  |
| H | 2.97201  | 0.98973  | 1.18609  |
| H | 2.30694  | 1.37343  | 2.75731  |
| C | 3.76045  | -0.23152 | 2.79912  |
| H | 3.38540  | -0.71023 | 3.72387  |
| H | 4.09408  | -1.06411 | 2.15132  |
| C | 4.96384  | 0.66608  | 3.13818  |
| H | 4.62455  | 1.50581  | 3.77733  |
| H | 5.34564  | 1.13478  | 2.20908  |
| C | 6.10725  | -0.08314 | 3.84126  |
| H | 6.95746  | 0.58297  | 4.07090  |

H 5.76513 -0.52908 4.79241  
H 6.48920 -0.90846 3.21350  
O 1.18338 -0.75756 0.27853

**TS (H-I)**

SCF (BP86) Energy = -2295.92347492  
Enthalpy 0K = -2294.826719  
Energy 298K = -2294.761692  
Free Energy 298K = -2294.925822  
Lowest Frequency = -45.8396 cm<sup>-1</sup>  
Second Frequency = 6.2262 cm<sup>-1</sup>  
SCF (BP86-D3BJ) Energy = -2296.24107548  
SCF (Toluene) Energy = -2295.93027322  
SCF (BS2) Energy = -2495.73202606

Mg -0.41050 0.17930 -0.09953  
O 0.67742 -0.54463 3.60495  
O -0.34491 0.75097 1.96512  
O 2.93958 -2.47518 0.36814  
O 2.29705 -1.38719 -1.58696  
N -0.32010 1.79834 -1.42286  
N -1.95744 -0.79479 -1.13674  
C -0.40283 2.63818 -3.77839  
H -0.23479 3.63710 -3.35105  
H -1.23664 2.68817 -4.49625  
H 0.50180 2.35955 -4.34696  
C -0.68286 1.59342 -2.70377  
C -1.33617 0.42404 -3.17304  
H -1.45470 0.38617 -4.25955  
C -1.95976 -0.64043 -2.48246  
C -2.64881 -1.67236 -3.36909  
H -3.54045 -2.10473 -2.89187  
H -1.94962 -2.50464 -3.56688  
H -2.93435 -1.24026 -4.34014  
C -2.87186 -1.74450 -0.55120  
C -4.17813 -1.28898 -0.17542  
C -5.04994 -2.18829 0.46797  
H -6.04929 -1.84972 0.75945  
C -4.66478 -3.50584 0.74711  
H -5.35612 -4.18726 1.25442  
C -3.39605 -3.94566 0.35990  
H -3.10209 -4.98247 0.55903  
C -2.48564 -3.09426 -0.30069  
C -1.15588 -3.68487 -0.78033  
H -0.59454 -2.88268 -1.29155  
C -1.40248 -4.82738 -1.79662  
H -1.87845 -5.69688 -1.30955  
H -0.44632 -5.17207 -2.22763  
H -2.05929 -4.51328 -2.62450  
C -0.28107 -4.20179 0.38389  
H -0.83154 -4.92646 1.00970  
H 0.07073 -3.37779 1.02156  
H 0.61440 -4.71648 -0.00526  
C -4.64728 0.13832 -0.48432  
H -3.74651 0.78080 -0.48074  
C -5.27682 0.24734 -1.89521  
H -6.13366 -0.44299 -1.99242  
H -4.55452 0.01320 -2.69081  
H -5.64633 1.27320 -2.07119  
C -5.64729 0.69829 0.55031  
H -6.63715 0.21571 0.46418  
H -5.80357 1.77681 0.37529  
H -5.29921 0.56563 1.58732  
C 0.25925 3.05755 -1.02644  
C -0.56504 3.99180 -0.32460  
C 0.01489 5.17883 0.15923  
H -0.60669 5.90041 0.69823

C 1.37389 5.45744 -0.03584  
H 1.80885 6.38331 0.35527  
C 2.16544 4.54973 -0.74415  
H 3.22439 4.77664 -0.91204  
C 1.63644 3.34779 -1.25898  
C -2.06550 3.73933 -0.15293  
H -2.19881 2.64893 -0.01157  
C -2.84934 4.12472 -1.43121  
H -2.70926 5.19581 -1.66123  
H -3.93039 3.94523 -1.29224  
H -2.52159 3.54109 -2.30461  
C -2.68698 4.45704 1.06146  
H -2.11433 4.28214 1.98748  
H -3.71968 4.10273 1.22305  
H -2.74451 5.54903 0.90566  
C 2.55985 2.44085 -2.07998  
H 1.97624 1.57128 -2.42637  
C 3.73671 1.89008 -1.24600  
H 4.41739 1.30622 -1.88953  
H 3.38144 1.22523 -0.44436  
H 4.32418 2.70454 -0.78664  
C 3.11408 3.18550 -3.31984  
H 2.31394 3.63976 -3.92641  
H 3.68192 2.49026 -3.96266  
H 3.80221 3.99650 -3.02235  
C 3.24663 -2.41081 -1.99310  
C 4.18040 -1.82726 -3.06062  
H 4.94735 -2.56308 -3.35927  
H 4.68800 -0.91886 -2.70358  
H 3.59752 -1.56209 -3.95854  
C 2.43793 -3.57302 -2.59903  
H 1.82826 -3.18740 -3.43269  
H 1.75676 -4.01105 -1.85189  
H 3.09147 -4.37228 -2.98804  
C 3.95498 -2.79147 -0.62170  
C 5.18435 -1.91520 -0.31646  
H 4.94114 -0.84386 -0.40407  
H 6.02935 -2.13992 -0.98944  
H 5.50807 -2.10664 0.71971  
C 4.32856 -4.27253 -0.47836  
H 5.06420 -4.57242 -1.24494  
H 3.44585 -4.92399 -0.56399  
H 4.78044 -4.44461 0.51256  
C -1.30311 0.63139 3.09732  
C -2.72069 0.51821 2.55384  
H -3.00439 1.44778 2.03297  
H -3.43059 0.37374 3.38638  
H -2.84068 -0.32903 1.86093  
C -1.14609 1.91191 3.93450  
H -0.13539 1.99103 4.36606  
H -1.87957 1.94192 4.75695  
H -1.31225 2.78798 3.28876  
C -0.76014 -0.65031 3.83492  
C -0.99193 -0.65248 5.35119  
H -0.56475 -1.57118 5.78485  
H -2.07063 -0.63660 5.58453  
H -0.51036 0.20784 5.83932  
C -1.25787 -1.96498 3.22192  
H -1.13427 -1.97720 2.12913  
H -2.32021 -2.14789 3.45421  
H -0.66348 -2.79620 3.63351  
B 0.91836 0.26044 2.50802  
B 2.04759 -1.55013 -0.20267  
C 2.29217 1.01236 2.34612  
H 2.43262 1.38626 1.31814  
H 2.19114 1.93016 2.96882  
C 3.52753 0.22289 2.82555

|   |         |          |         |
|---|---------|----------|---------|
| H | 3.33408 | -0.16517 | 3.84407 |
| H | 3.66078 | -0.66797 | 2.18441 |
| C | 4.82105 | 1.05682  | 2.84009 |
| H | 4.66420 | 1.96150  | 3.46096 |
| H | 5.03019 | 1.42753  | 1.81744 |
| C | 6.03869 | 0.28078  | 3.36567 |
| H | 6.95120 | 0.90197  | 3.36690 |
| H | 5.87099 | -0.07049 | 4.39958 |
| H | 6.24177 | -0.61033 | 2.74549 |
| O | 1.07287 | -0.90376 | 0.45925 |

**I**

SCF (BP86) Energy = -2295.93401651  
 Enthalpy 0K = -2294.837658  
 Energy 298K = -2294.770999  
 Free Energy 298K = -2294.943304  
 Lowest Frequency = 8.2984 cm<sup>-1</sup>  
 Second Frequency = 13.6700 cm<sup>-1</sup>  
 SCF (BP86-D3BJ) Energy = -2296.24478231  
 SCF (Toluene) Energy = -2295.93942306  
 SCF (BS2) Energy = -2495.74466500

|    |          |          |          |
|----|----------|----------|----------|
| Mg | -0.21176 | 0.14614  | -0.11824 |
| O  | 0.01190  | -1.75203 | 3.81917  |
| O  | -0.41203 | -0.56337 | 1.88189  |
| O  | 3.90129  | -0.27977 | -0.92628 |
| O  | 3.19547  | 1.91157  | -1.29012 |
| N  | -1.34721 | 1.81748  | -0.63801 |
| N  | -1.03804 | -1.05873 | -1.61993 |
| C  | -1.37639 | 3.44400  | -2.52858 |
| H  | -2.06921 | 4.06860  | -1.94588 |
| H  | -1.69099 | 3.43920  | -3.58311 |
| H  | -0.38392 | 3.92773  | -2.47392 |
| C  | -1.27182 | 2.03042  | -1.97155 |
| C  | -1.03640 | 1.00903  | -2.92801 |
| H  | -0.92477 | 1.37027  | -3.95409 |
| C  | -1.00620 | -0.40517 | -2.80117 |
| C  | -0.86205 | -1.17218 | -4.11110 |
| H  | -1.22795 | -2.20557 | -4.03233 |
| H  | 0.20934  | -1.22160 | -4.37896 |
| H  | -1.38316 | -0.66256 | -4.93659 |
| C  | -1.25111 | -2.48101 | -1.59577 |
| C  | -2.58693 | -2.99300 | -1.66284 |
| C  | -2.78192 | -4.38631 | -1.58606 |
| H  | -3.80011 | -4.78607 | -1.64590 |
| C  | -1.70627 | -5.26963 | -1.43441 |
| H  | -1.88187 | -6.34924 | -1.37653 |
| C  | -0.40587 | -4.75894 | -1.35986 |
| H  | 0.43966  | -5.44746 | -1.24945 |
| C  | -0.14952 | -3.37530 | -1.44089 |
| C  | 1.29823  | -2.88607 | -1.40572 |
| H  | 1.29652  | -1.78330 | -1.37722 |
| C  | 2.07273  | -3.31069 | -2.67539 |
| H  | 2.17494  | -4.40953 | -2.73477 |
| H  | 3.08455  | -2.87125 | -2.65899 |
| H  | 1.56509  | -2.97472 | -3.59504 |
| C  | 2.05563  | -3.36099 | -0.14688 |
| H  | 2.20985  | -4.45521 | -0.14607 |
| H  | 1.50890  | -3.10194 | 0.77627  |
| H  | 3.04205  | -2.87041 | -0.10490 |
| C  | -3.80094 | -2.07336 | -1.83931 |
| H  | -3.47892 | -1.05569 | -1.55363 |
| C  | -4.27402 | -2.02122 | -3.31240 |
| H  | -4.57292 | -3.02657 | -3.65956 |
| H  | -3.48775 | -1.65220 | -3.98793 |
| H  | -5.14850 | -1.35441 | -3.41500 |
| C  | -4.99538 | -2.47008 | -0.94227 |

|   |          |          |          |
|---|----------|----------|----------|
| H | -5.45693 | -3.41789 | -1.27129 |
| H | -5.78093 | -1.69611 | -0.99292 |
| H | -4.70175 | -2.59213 | 0.11279  |
| C | -1.77904 | 2.88657  | 0.22339  |
| C | -3.17632 | 3.07338  | 0.46680  |
| C | -3.57956 | 4.08911  | 1.35596  |
| H | -4.64866 | 4.24394  | 1.53939  |
| C | -2.64603 | 4.90307  | 2.00898  |
| H | -2.98166 | 5.68539  | 2.69820  |
| C | -1.28148 | 4.70894  | 1.76869  |
| H | -0.54760 | 5.34886  | 2.27201  |
| C | -0.82189 | 3.71697  | 0.87951  |
| C | -4.24185 | 2.22030  | -0.22881 |
| H | -3.72476 | 1.34544  | -0.66344 |
| C | -4.91729 | 2.98502  | -1.39265 |
| H | -5.41966 | 3.89616  | -1.02141 |
| H | -5.68007 | 2.35366  | -1.88186 |
| H | -4.18980 | 3.29099  | -2.16079 |
| C | -5.32369 | 1.70571  | 0.74729  |
| H | -4.88191 | 1.20002  | 1.62169  |
| H | -5.99057 | 0.98940  | 0.23638  |
| H | -5.95826 | 2.52716  | 1.12384  |
| C | 0.68033  | 3.57790  | 0.63424  |
| H | 0.84437  | 2.77040  | -0.09865 |
| C | 1.43405  | 3.17419  | 1.92059  |
| H | 2.49946  | 3.00225  | 1.69342  |
| H | 1.02534  | 2.24400  | 2.34984  |
| H | 1.36815  | 3.96017  | 2.69466  |
| C | 1.29308  | 4.86603  | 0.03952  |
| H | 0.75144  | 5.19431  | -0.86368 |
| H | 2.34323  | 4.68068  | -0.24088 |
| H | 1.26955  | 5.70109  | 0.76301  |
| C | 4.44988  | 1.75654  | -2.00355 |
| C | 5.26959  | 3.04331  | -1.85105 |
| H | 6.26227  | 2.94055  | -2.32333 |
| H | 5.41044  | 3.30859  | -0.79223 |
| H | 4.74540  | 3.87917  | -2.34423 |
| C | 4.10668  | 1.52285  | -3.48809 |
| H | 3.48451  | 2.35941  | -3.84626 |
| H | 3.53148  | 0.59075  | -3.61465 |
| H | 5.00991  | 1.46656  | -4.11960 |
| C | 5.07863  | 0.47619  | -1.31359 |
| C | 5.85213  | 0.81704  | -0.02507 |
| H | 5.24499  | 1.45224  | 0.64076  |
| H | 6.80203  | 1.33737  | -0.23629 |
| H | 6.08254  | -0.11763 | 0.51210  |
| C | 5.94680  | -0.39425 | -2.23022 |
| H | 6.82465  | 0.16656  | -2.59616 |
| H | 5.37762  | -0.76003 | -3.09830 |
| H | 6.31442  | -1.27117 | -1.67126 |
| C | -1.73393 | -0.74138 | 2.58281  |
| C | -2.80493 | -1.02579 | 1.53869  |
| H | -2.95223 | -0.15065 | 0.88464  |
| H | -3.76673 | -1.22919 | 2.03922  |
| H | -2.54877 | -1.89152 | 0.90984  |
| C | -2.00456 | 0.57510  | 3.32246  |
| H | -1.22918 | 0.77848  | 4.07905  |
| H | -2.98313 | 0.54312  | 3.82916  |
| H | -2.02101 | 1.41196  | 2.60570  |
| C | -1.41273 | -1.94688 | 3.53904  |
| C | -2.17066 | -1.91997 | 4.86977  |
| H | -1.86492 | -2.78294 | 5.48289  |
| H | -3.25884 | -1.99097 | 4.70182  |
| H | -1.95998 | -1.00389 | 5.44097  |
| C | -1.55181 | -3.32321 | 2.86686  |
| H | -1.03499 | -3.35987 | 1.89389  |
| H | -2.60920 | -3.59101 | 2.70762  |

|   |          |          |          |
|---|----------|----------|----------|
| H | -1.09883 | -4.08363 | 3.52286  |
| B | 0.58333  | -1.03886 | 2.79527  |
| B | 2.82654  | 0.63638  | -0.79445 |
| C | 2.11984  | -0.76181 | 2.69236  |
| H | 2.42093  | -0.75009 | 1.62861  |
| H | 2.28455  | 0.28561  | 3.02499  |
| C | 3.00211  | -1.71368 | 3.52887  |
| H | 2.66188  | -1.71808 | 4.58221  |
| H | 2.86801  | -2.75196 | 3.16780  |
| C | 4.49645  | -1.35295 | 3.47394  |
| H | 4.63335  | -0.31823 | 3.84552  |
| H | 4.82331  | -1.33991 | 2.41661  |
| C | 5.38263  | -2.31257 | 4.28264  |
| H | 6.44733  | -2.02763 | 4.22748  |
| H | 5.09409  | -2.32146 | 5.34909  |
| H | 5.29467  | -3.34834 | 3.90875  |
| O | 1.64700  | 0.33085  | -0.26198 |

### J

SCF (BP86) Energy = -1726.80531598  
 Enthalpy 0K = -1726.005559  
 Energy 298K = -1725.956469  
 Free Energy 298K = -1726.090799  
 Lowest Frequency = 12.5754 cm<sup>-1</sup>  
 Second Frequency = 13.1118 cm<sup>-1</sup>  
 SCF (BP86-D3BJ) Energy = -1727.02112890  
 SCF (Toluene) Energy = -1726.81471062  
 SCF (BS2) Energy = -1926.47609891

|    |          |          |          |
|----|----------|----------|----------|
| Mg | 0.03421  | -0.46528 | -0.31445 |
| N  | -1.40217 | -1.75343 | 0.30641  |
| N  | 1.61324  | -1.60360 | 0.24810  |
| C  | -2.24905 | -3.93093 | 1.12304  |
| H  | -2.85554 | -3.51093 | 1.94378  |
| H  | -1.87290 | -4.91642 | 1.43313  |
| H  | -2.93471 | -4.06327 | 0.26878  |
| C  | -1.11168 | -2.99125 | 0.75918  |
| C  | 1.46318  | -2.86431 | 0.70779  |
| C  | 2.70098  | -3.68720 | 1.02386  |
| H  | 3.37722  | -3.72579 | 0.15296  |
| H  | 2.43694  | -4.71373 | 1.31609  |
| H  | 3.27834  | -3.22642 | 1.84382  |
| C  | 2.93249  | -1.03653 | 0.10220  |
| C  | 3.56816  | -1.06268 | -1.17215 |
| C  | 4.80953  | -0.41337 | -1.31669 |
| H  | 5.30571  | -0.42272 | -2.29354 |
| C  | 5.41681  | 0.24565  | -0.24137 |
| H  | 6.38229  | 0.74492  | -0.37520 |
| C  | 4.77898  | 0.26778  | 1.00479  |
| H  | 5.25139  | 0.79229  | 1.84296  |
| C  | 3.53599  | -0.36340 | 1.20341  |
| C  | 2.85197  | -0.27349 | 2.56969  |
| H  | 1.97356  | -0.94210 | 2.54871  |
| C  | 3.76706  | -0.74521 | 3.72164  |
| H  | 4.64363  | -0.08483 | 3.84246  |
| H  | 4.14366  | -1.76872 | 3.55317  |
| H  | 3.21557  | -0.73820 | 4.67791  |
| C  | 2.33900  | 1.16177  | 2.83679  |
| H  | 3.18082  | 1.87620  | 2.87380  |
| H  | 1.81318  | 1.21230  | 3.80686  |
| H  | 1.64517  | 1.50932  | 2.05165  |
| C  | 2.92554  | -1.74540 | -2.38169 |
| H  | 2.04431  | -2.30368 | -2.01668 |
| C  | 3.87072  | -2.76927 | -3.04880 |
| H  | 4.75861  | -2.27955 | -3.48565 |
| H  | 3.34950  | -3.29552 | -3.86730 |
| H  | 4.22731  | -3.52565 | -2.32868 |

|   |          |          |          |
|---|----------|----------|----------|
| C | 2.42988  | -0.70015 | -3.41032 |
| H | 1.70068  | 0.00136  | -2.96844 |
| H | 1.94954  | -1.20102 | -4.26969 |
| H | 3.27394  | -0.10343 | -3.79934 |
| C | -2.77652 | -1.32589 | 0.19400  |
| C | -3.45143 | -1.45981 | -1.05333 |
| C | -4.75849 | -0.94838 | -1.16771 |
| H | -5.28573 | -1.04164 | -2.12364 |
| C | -5.39201 | -0.31891 | -0.08967 |
| H | -6.40889 | 0.07240  | -0.20004 |
| C | -4.71405 | -0.18585 | 1.12785  |
| H | -5.20708 | 0.31662  | 1.96773  |
| C | -3.40535 | -0.67830 | 1.29590  |
| C | -2.68659 | -0.47094 | 2.63106  |
| H | -1.73290 | -1.02581 | 2.58621  |
| C | -3.49205 | -1.02847 | 3.82599  |
| H | -2.91376 | -0.92687 | 4.76086  |
| H | -3.73788 | -2.09586 | 3.69196  |
| H | -4.44240 | -0.48390 | 3.96524  |
| C | -2.35015 | 1.02303  | 2.85263  |
| H | -3.27268 | 1.62816  | 2.90606  |
| H | -1.72974 | 1.43752  | 2.03911  |
| H | -1.80388 | 1.16086  | 3.80263  |
| C | -2.78156 | -2.10281 | -2.26978 |
| H | -1.83686 | -2.56065 | -1.92475 |
| C | -3.63771 | -3.23074 | -2.88716 |
| H | -3.89376 | -4.00425 | -2.14279 |
| H | -3.09084 | -3.71873 | -3.71259 |
| H | -4.58359 | -2.84276 | -3.30401 |
| C | -2.42683 | -1.03413 | -3.33222 |
| H | -3.33973 | -0.53903 | -3.70814 |
| H | -1.91883 | -1.50042 | -4.19523 |
| H | -1.76662 | -0.24921 | -2.92329 |
| O | -0.10493 | 1.02887  | -1.41659 |
| B | -0.17073 | 2.31760  | -1.05339 |
| O | -0.35201 | 3.40326  | -1.91932 |
| O | -0.06602 | 2.74703  | 0.29910  |
| C | -0.62607 | 4.57189  | -1.10010 |
| C | 0.06731  | 4.20015  | 0.27550  |
| C | 1.57338  | 4.52173  | 0.28567  |
| H | 1.76036  | 5.60821  | 0.32890  |
| H | 2.03632  | 4.05637  | 1.17111  |
| H | 2.06864  | 4.11679  | -0.61221 |
| C | -0.60823 | 4.78279  | 1.52085  |
| H | -0.07266 | 4.45249  | 2.42665  |
| H | -0.58728 | 5.88636  | 1.49944  |
| H | -1.65488 | 4.45365  | 1.60464  |
| C | -2.15758 | 4.69560  | -0.98161 |
| H | -2.45845 | 5.60947  | -0.44137 |
| H | -2.59020 | 4.73234  | -1.99458 |
| H | -2.58503 | 3.82287  | -0.46074 |
| C | -0.04964 | 5.80690  | -1.80204 |
| H | -0.17827 | 6.71173  | -1.18274 |
| H | 1.02037  | 5.68110  | -2.02581 |
| H | -0.57797 | 5.96997  | -2.75604 |
| C | 0.20733  | -3.48749 | 0.92147  |
| H | 0.26544  | -4.51530 | 1.28695  |

## References

1. Dove, A. P.; Gibson, V. C.; Hormnirun, P.; Marshall, E. L.; Segal, J. A.; White, A. J. P.; Williams, D. *J. Dalton Trans.* **2003**, 3088-3097.
2. Bourhis, L. J.; Dolomanov, O. V.; Gildea, R. J.; Howard, J. A. K.; Puschmann, H. *Acta Cryst. A* **2015**, *71*, 59-75.
3. Sheldrick, G. M. *Acta Cryst. C*, **2015**, *71*, 3-8.
4. Frisch, M. J.; Trucks, G. W.; Schlegel, H. B.; Scuseria, G. E.; Robb, M. A.; Cheeseman, J. R.; Scalmani, G.; Barone, V.; Mennucci, B.; Petersson, G. A.; Nakatsuji, H.; Caricato, M.; Li, X.; Hratchian, H. P.; Izmaylov, A. F.; Bloino, J.; Zheng, G.; Sonnenberg, J. L.; Hada, M.; Ehara, M.; Toyota, K.; Fukuda, R.; Hasegawa, J.; Ishida, M.; Nakajima, T.; Honda, Y.; Kitao, O.; Nakai, H.; Vreven, T.; Montgomery, J. A., Jr.; Peralta, J. E.; Ogliaro, F.; Bearpark, M.; Heyd, J. J.; Brothers, E.; Kudin, K. N.; Staroverov, V. N.; Kobayashi, R.; Normand, J.; Raghavachari, K.; Rendell, A.; Burant, J. C.; Iyengar, S. S.; Tomasi, J.; Cossi, M.; Rega, N.; Millam, J. M.; Klene, M.; Knox, J. E.; Cross, J. B.; Bakken, V.; Adamo, C.; Jaramillo, J.; Gomperts, R.; Stratmann, R. E.; Yazyev, O.; Austin, A. J.; Cammi, R.; Pomelli, C.; Ochterski, J. W.; Martin, R. L.; Morokuma, K.; Zakrzewski, V. G.; Voth, G. A.; Salvador, P.; Dannenberg, J. J.; Dapprich, S.; Daniels, A. D.; Farkas, O.; Foresman, J. B.; Ortiz, J. V.; Cioslowski, J.; Fox, D. J. *Gaussian 09 (Revision D.01)*; Gaussian Inc.: Wallingford, CT, 2009.
5. Andrae, D., Häußermann, U., Dolg, M., Stoll, H., Preuß, H., *Theor. Chim. Acta* **77**, 123–141 (1990).
6. (a) Hariharan, P. C., Pople, J. A. *Theor. Chim. Acta* **28**, 213–222 (1973). (b) Hehre, W. J., Ditchfield, R., Pople, J. A. *J. Chem. Phys.* **56**, 2257 (1972).
7. (a) Becke, A. D. *Phys. Rev. A: At., Mol., Opt. Phys.* **38**, 3098 (1988). (b) Perdew, J. P. *Phys. Rev. B: Condens. Matter Mater. Phys.* **33**, 8822–8824 (1986).
8. Tomasi, J., Mennucci, B., Cammi, R. *Chem. Rev.* **105**, 2999–3094 (2005).
9. S. Grimme, S. Ehrlich and L. Goerigk, “Effect of the damping function in dispersion corrected density functional theory,” *J. Comp. Chem.* **32**, 1456-1465 (2011).
